# Supplementary material for: Identification and validation of a tear fluid-derived protein biomarker signature in patients with amyotrophic lateral sclerosis
Source: Acta Neuropathol Commun. 2025 Sep 2;13:187. doi: 10.1186/s40478-025-02109-6 (PMC12403336; doi:10.1186/s40478-025-02109-6)
Supplement: Supplementary file 2 — Supplementary Material 2 [file 40478_2025_2109_MOESM2_ESM.xlsx]

## Sheet: FDR cutoff 0.1
STATS			PROTEIN ANNOTATIONS
Significant	-LOG(FDR)	Difference (log2FC)	PG.Genes	PG.ProteinDescriptions
+	3.87796	0.742675	TMEM189-UBE2V1;UBE2V1;UBE2V1;UBE2V1;UBE2V1	HCG2044781;Ubiquitin-conjugating enzyme E2 variant 1;Isoform 1 of Ubiquitin-conjugating enzyme E2 variant 1;Isoform 2 of Ubiquitin-conjugating enzyme E2 variant 1;Isoform 5 of Ubiquitin-conjugating enzyme E2 variant 1
+	2.08046	0.572002	DDB1	DNA damage-binding protein 1
+	1.65228	0.55994	WARS	Tryptophan--tRNA ligase, cytoplasmic
+	1.93281	0.541144	PSAPL1	Proactivator polypeptide-like 1
+	2.2026	0.485597	FBP2	Fructose-1,6-bisphosphatase isozyme 2
+	1.63932	0.454637	LGALS7	Galectin-7
+	1.67079	0.408318	HSPA1L	Heat shock 70 kDa protein 1-like;HSPA1L (Fragment)
+	2.30546	0.389775	SUMO3;SUMO3;SUMO3;SUMO3;SUMO2;SUMO2;SUMO4	Small ubiquitin-related modifier 3;SMT3 suppressor of mif two 3 homolog 3 (Yeast), isoform CRA_d;Small ubiquitin-related modifier 3;Isoform 2 of Small ubiquitin-related modifier 3;Small ubiquitin-related modifier 2;Isoform 2 of Small ubiquitin-related modifier 2;Small ubiquitin-related modifier 4
+	1.97346	0.337406	SH3BGRL	SH3 domain-binding glutamic acid-rich-like protein
+	3.14642	0.317056	PSMB2	Proteasome subunit beta type-2
+	1.98318	0.31599	HNRNPD	Heterogeneous nuclear ribonucleoprotein D0 (Fragment);Heterogeneous nuclear ribonucleoprotein D0 (Fragment);Heterogeneous nuclear ribonucleoprotein D0;Isoform 2 of Heterogeneous nuclear ribonucleoprotein D0;Isoform 3 of Heterogeneous nuclear ribonucleoprotein D0;Isoform 4 of Heterogeneous nuclear ribonucleoprotein D0
+	2.29537	0.309134	GSN	Isoform 2 of Gelsolin
+	2.82543	-1.5001	EIF2S2	Eukaryotic translation initiation factor 2 subunit 2
+	6.47634	-0.958687	HP	Haptoglobin
+	2.93258	-0.704123	AMY1A	Alpha-amylase 1
+	1.53415	-0.685036	ALDH16A1	Aldehyde dehydrogenase family 16 member A1
+	3.76342	-0.669977		Ig-like domain-containing protein (Fragment)
+	2.72335	-0.668717	CXCL17	C-X-C motif chemokine 17
+	3.09872	-0.650682	MSLN	Isoform 3 of Mesothelin;Isoform 2 of Mesothelin;Isoform 4 of Mesothelin
+	2.58937	-0.64074	IGHV1-2	Immunoglobulin heavy variable 1-2
+	3.42814	-0.639504	GALNT5	Polypeptide N-acetylgalactosaminyltransferase 5
+	2.51003	-0.59395	SCGB1D1	Secretoglobin family 1D member 1
+	2.11037	-0.592711	IGLV2-18	Immunoglobulin lambda variable 2-18
+	2.64104	-0.581964	IGHV3-7	Immunoglobulin heavy variable 3-7
+	3.62143	-0.579866	GLG1	Golgi apparatus protein 1;Isoform 2 of Golgi apparatus protein 1;Isoform 3 of Golgi apparatus protein 1
+	2.35772	-0.573238	DKK4	Dickkopf-related protein 4
+	2.54581	-0.568784	LACRT	Extracellular glycoprotein lacritin
+	1.7074	-0.561901	IGHV1OR15-1	Immunoglobulin heavy variable 1/OR15-1 (non-functional) (Fragment)
+	2.74146	-0.552378	MFGE8	Lactadherin
+	2.8723	-0.550751	RNASET2	Ribonuclease T2;Ribonuclease T2 (Fragment);Ribonuclease T2
+	2.75824	-0.547425	SIL1	Nucleotide exchange factor SIL1
+	3.01675	-0.536866	TCN1	Transcobalamin-1
+	3.142	-0.536215	AQP5	Aquaporin-5
+	2.84055	-0.535175	FMOD	Fibromodulin
+	2.05419	-0.52898	IGKV1-8	Immunoglobulin kappa variable 1-8
+	2.59499	-0.524628	LTF	Lactotransferrin
+	1.93102	-0.512633	A2M	Alpha-2-macroglobulin
+	1.77617	-0.505014	PLA2G2A	Phospholipase A(2);Phospholipase A2, membrane associated
+	2.1736	-0.504939	LCN1	Lipocalin-1
+	3.19192	-0.501686	IGKV3D-15	Immunoglobulin kappa variable 3D-15
+	1.70798	-0.495752	LACRT	Extracellular glycoprotein lacritin (Fragment)
+	1.93512	-0.495004	CD9	Tetraspanin;Tetraspanin;Tetraspanin;CD9 antigen
+	2.3751	-0.492625	FOLH1	Glutamate carboxypeptidase 2;Isoform PSMA' of Glutamate carboxypeptidase 2;Isoform PSMA-7 of Glutamate carboxypeptidase 2;Isoform PSMA-8 of Glutamate carboxypeptidase 2;Isoform PSMA-9 of Glutamate carboxypeptidase 2
+	2.32881	-0.492402	DPP4	Dipeptidyl peptidase 4
+	2.61769	-0.486326	PIP	Prolactin-inducible protein
+	2.80791	-0.483809	IGHV3-15	Immunoglobulin heavy variable 3-15
+	3.10869	-0.482377	TIMP1	Metalloproteinase inhibitor 1
+	2.29346	-0.481846	IGHV3-64D	Immunoglobulin heavy variable 3-64D
+	2.09778	-0.472706	IGHV4-34	Immunoglobulin heavy variable 4-34
+	2.16613	-0.469033	HYOU1	Hypoxia up-regulated protein 1
+	2.7143	-0.469009	SERPINC1	Antithrombin-III
+	1.84679	-0.464754	JCHAIN	Immunoglobulin J chain
+	2.28035	-0.462767	IGKV1-16	Immunoglobulin kappa variable 1-16
+	5.07629	-0.460748	CALM1;CALM2;CALM3	Calmodulin-1;Calmodulin-2;Calmodulin-3
+	2.20014	-0.460592	RNASE4	Ribonuclease 4
+	1.46751	-0.455882	PRSS3	Trypsin-3 (Fragment);Trypsin-3;Isoform 2 of Trypsin-3;Isoform 3 of Trypsin-3;Isoform 4 of Trypsin-3;Isoform 5 of Trypsin-3
+	2.48449	-0.453853	IGKV4-1	Immunoglobulin kappa variable 4-1
+	2.66243	-0.449496	SDCBP	Syntenin-1;Isoform 3 of Syntenin-1
+	1.73255	-0.449206	PLOD1	Procollagen-lysine,2-oxoglutarate 5-dioxygenase 1;Isoform 2 of Procollagen-lysine,2-oxoglutarate 5-dioxygenase 1
+	2.31513	-0.448486	GRN	Progranulin
+	2.17895	-0.445573	HTRA1	Serine protease HTRA1
+	1.98315	-0.445552	IGLV6-57	Immunoglobulin lambda variable 6-57
+	2.32075	-0.442684	IGHV3-49	Immunoglobulin heavy variable 3-49
+	2.84183	-0.441244	IGKC	Immunoglobulin kappa constant
+	2.06896	-0.439618	PAM	Peptidyl-glycine alpha-amidating monooxygenase;Isoform 2 of Peptidyl-glycine alpha-amidating monooxygenase;Isoform 3 of Peptidyl-glycine alpha-amidating monooxygenase;Isoform 4 of Peptidyl-glycine alpha-amidating monooxygenase;Isoform 5 of Peptidyl-glycine alpha-amidating monooxygenase;Isoform 6 of Peptidyl-glycine alpha-amidating monooxygenase
+	1.70971	-0.437084	OAF	Out at first protein homolog
+	2.14328	-0.435292	SERPINI1	Neuroserpin
+	1.94196	-0.434862	IGHV1-46	Immunoglobulin heavy variable 1-46
+	2.06096	-0.434558	IGHV3-35	Probable non-functional immunoglobulin heavy variable 3-35
+	1.48236	-0.434466	KRT4	Keratin, type II cytoskeletal 4
+	1.65314	-0.432823	IGLV1-47	Immunoglobulin lambda variable 1-47
+	1.83483	-0.426761	IGKV2D-24;IGKV2-24	Probable non-functional immunoglobulin kappa variable 2D-24;Immunoglobulin kappa variable 2-24
+	2.06158	-0.426556	PIGR	Polymeric immunoglobulin receptor
+	2.18354	-0.425018	CD44	CD44 antigen (Fragment);CD44 antigen (Fragment);CD44 antigen;CD44 antigen (Fragment);CD44 antigen;Isoform 10 of CD44 antigen;Isoform 11 of CD44 antigen;Isoform 12 of CD44 antigen;Isoform 13 of CD44 antigen;Isoform 14 of CD44 antigen;Isoform 15 of CD44 antigen;Isoform 16 of CD44 antigen;Isoform 17 of CD44 antigen;Isoform 18 of CD44 antigen;Isoform 3 of CD44 antigen;Isoform 4 of CD44 antigen;Isofor…
+	1.92583	-0.423418	SLPI	Antileukoproteinase
+	1.67109	-0.422303	SCGB2A1	Mammaglobin-B
+	1.5639	-0.421422	IGKV1-27	Immunoglobulin kappa variable 1-27
+	3.9981	-0.420296	CP	Ceruloplasmin
+	2.01387	-0.419149	LGALS3BP	Galectin-3-binding protein
+	1.78579	-0.415347	IGKV3-7	Probable non-functional immunoglobulin kappa variable 3-7
+	1.50176	-0.415164	PODXL	Podocalyxin;Isoform 2 of Podocalyxin
+	1.59318	-0.414677	NUCB2	Nucleobindin-2;Isoform 2 of Nucleobindin-2
+	1.8666	-0.413738	SPARCL1	SPARC-like protein 1;Isoform 2 of SPARC-like protein 1
+	2.32734	-0.408113	CRYM	Ketimine reductase mu-crystallin
+	2.1084	-0.407495	CST3	Cystatin-C
+	1.57001	-0.407084	CHID1	Chitinase domain-containing protein 1;Isoform 2 of Chitinase domain-containing protein 1;Isoform 3 of Chitinase domain-containing protein 1
+	2.92289	-0.401089	GMPPA	Mannose-1-phosphate guanyltransferase alpha;Isoform 2 of Mannose-1-phosphate guanyltransferase alpha
+	2.45865	-0.400444	LCN2	Neutrophil gelatinase-associated lipocalin
+	1.97575	-0.398392	CD59;;CD59;CD59	CD59 glycoprotein (Fragment);UPAR/Ly6 domain-containing protein;CD59 glycoprotein;Isoform 2 of CD59 glycoprotein
+	2.05509	-0.393013	IGHV3OR16-9	Immunoglobulin heavy variable 3/OR16-9 (non-functional) (Fragment)
+	1.6637	-0.391837	IGKV3D-11;IGKV3-11	Immunoglobulin kappa variable 3D-11;Immunoglobulin kappa variable 3-11
+	1.97696	-0.384836	IGHA1	Immunoglobulin heavy constant alpha 1
+	1.79737	-0.383875	CALU	Calumenin;Isoform 3 of Calumenin
+	1.8841	-0.381527	IGKV1-39;IGKV1D-39	Immunoglobulin kappa variable 1-39;Immunoglobulin kappa variable 1D-39
+	2.57481	-0.380462	BPNT1	3'(2'),5'-bisphosphate nucleotidase 1;Isoform 4 of 3'(2'),5'-bisphosphate nucleotidase 1
+	1.89302	-0.380315	IGKV1D-33	Immunoglobulin kappa variable 1-33
+	1.65185	-0.379682	IGHV3-74	Immunoglobulin heavy variable 3-74
+	1.74789	-0.379026	HSPA13	Heat shock 70 kDa protein 13
+	2.1039	-0.375485	CLU	Clusterin;Isoform 2 of Clusterin;Isoform 4 of Clusterin;Isoform 5 of Clusterin;Isoform 6 of Clusterin
+	3.80895	-0.371987	CAPZA2	F-actin-capping protein subunit alpha-2
+	2.49668	-0.34091	SERPINA3	Alpha-1-antichymotrypsin
+	1.83359	-0.335763	QSOX1	Sulfhydryl oxidase 1
+	2.10585	-0.335686	LYPD2	Ly6/PLAUR domain-containing protein 2
+	2.63666	-0.331193	ACTR1B	Beta-centractin
+	2.79063	-0.330512	GPS1	COP9 signalosome complex subunit 1;COP9 signalosome complex subunit 1;Isoform 4 of COP9 signalosome complex subunit 1;Isoform 2 of COP9 signalosome complex subunit 1
+	3.52371	-0.235444	PFKL	ATP-dependent 6-phosphofructokinase, liver type
-	1.17463	-0.521123	IGKV2D-28	Immunoglobulin kappa variable 2D-28
-	1.13983	-0.467956	DYNC1H1	Cytoplasmic dynein 1 heavy chain 1
-	1.16185	-0.434378	PRR4	Proline-rich protein 4
-	1.21135	-0.420715	IGKV1D-16	Immunoglobulin kappa variable 1D-16
-	1.26828	-0.419744	IGHV6-1	Immunoglobulin heavy variable 6-1
-	1.06913	-0.410729	IGHV3-64	Immunoglobulin heavy variable 3-64
-	1.4331	-0.395183	DMBT1	Deleted in malignant brain tumors 1 protein;Deleted in malignant brain tumors 1 protein;Isoform 3 of Deleted in malignant brain tumors 1 protein;Isoform 5 of Deleted in malignant brain tumors 1 protein;Isoform 6 of Deleted in malignant brain tumors 1 protein;Isoform 7 of Deleted in malignant brain tumors 1 protein
-	0.854822	-0.390424	NSFL1C	NSFL1 cofactor p47;Isoform 3 of NSFL1 cofactor p47;Isoform 4 of NSFL1 cofactor p47
-	1.44852	-0.38693	IGLV2-8	Immunoglobulin lambda variable 2-8
-	1.37502	-0.381757	IGKV2-40	Immunoglobulin kappa variable 2-40
-	1.4221	-0.379943		Ig-like domain-containing protein (Fragment)
-	1.06821	-0.37954	IGLV9-49	Immunoglobulin lambda variable 9-49
-	1.10735	-0.371705	IGLL1	Immunoglobulin lambda-like polypeptide 1
-	1.49876	-0.371036	AZGP1	Zinc-alpha-2-glycoprotein
-	1.5764	-0.370286	PRSS8	Prostasin
-	1.40274	-0.366994	GALNT6	Polypeptide N-acetylgalactosaminyltransferase 6
-	1.49294	-0.355824	IGHV3-38	Probable non-functional immunoglobulin heavy variable 3-38
-	1.19257	-0.355683	C4BPA	C4b-binding protein alpha chain
-	1.34266	-0.353524	IGHV3-43D	Immunoglobulin heavy variable 3-43D
-	1.20844	-0.351741	IGHV3-72	Immunoglobulin heavy variable 3-72
-	1.21887	-0.349722	IGHV3OR15-7	Immunoglobulin heavy variable 3/OR15-7 (pseudogene) (Fragment)
-	1.72111	-0.348122	IGLC2;IGLC3	Immunoglobulin lambda constant 2;Immunoglobulin lambda constant 3
-	1.54091	-0.346981	IGHV5-51	Immunoglobulin heavy variable 5-51
-	1.23329	-0.345344	SERPINA6	Corticosteroid-binding globulin
-	1.26549	-0.340005	GOLM1	Golgi membrane protein 1;Isoform 2 of Golgi membrane protein 1
-	1.24598	-0.334555	CTSL	Cathepsin L1
-	1.29379	-0.333339	IGHV3OR16-12	Immunoglobulin heavy variable 3/OR16-12 (non-functional) (Fragment)
-	1.5877	-0.332355	ERAP1	Endoplasmic reticulum aminopeptidase 1;Isoform 2 of Endoplasmic reticulum aminopeptidase 1
-	1.58611	-0.329966	IGKV3-20	Immunoglobulin kappa variable 3-20
-	0.866003	-0.328074	SFRP1	Secreted frizzled-related protein 1
-	1.27668	-0.323865	IGLV3-21	Immunoglobulin lambda variable 3-21
-	1.45892	-0.322777	ADGRG6	Adhesion G-protein coupled receptor G6;Isoform 2 of Adhesion G-protein coupled receptor G6;Isoform 3 of Adhesion G-protein coupled receptor G6;Isoform 4 of Adhesion G-protein coupled receptor G6
-	0.924296	-0.317519	FAM3B	Protein FAM3B;Protein FAM3B;Isoform A of Protein FAM3B
-	1.60926	-0.312489	ANPEP	Aminopeptidase N
-	1.69573	-0.308653	NIBAN1	Protein Niban 1
-	1.44041	-0.307846	SERPINB8	Serpin B8
-	1.38599	-0.306797	GANAB	Neutral alpha-glucosidase AB;Isoform 2 of Neutral alpha-glucosidase AB
-	0.944944	-0.305543	PSAP	Prosaposin;Prosaposin;Isoform Sap-mu-6 of Prosaposin;Isoform Sap-mu-9 of Prosaposin
-	1.27132	-0.301474	FGG	Fibrinogen gamma chain;Fibrinogen gamma chain;Fibrinogen gamma chain;Isoform Gamma-A of Fibrinogen gamma chain
-	1.43649	-0.300174	C4B_2;C4B;C4B	Complement C4-B
-	0.829348	-0.297693	DCD	Dermcidin;Isoform 2 of Dermcidin
-	0.538469	-0.296051	CST2	Cystatin-SA
-	1.45956	-0.293332	HEXB	Beta-hexosaminidase subunit beta
-	1.15845	-0.293264	CDH1	Cadherin-1
-	1.60621	-0.292491	VTN	Vitronectin
-	0.833104	-0.292099	KRT3	Keratin, type II cytoskeletal 3
-	1.05195	-0.289451	ORM1	Alpha-1-acid glycoprotein 1
-	0.985924	-0.288409	LHPP	Phospholysine phosphohistidine inorganic pyrophosphate phosphatase;Phospholysine phosphohistidine inorganic pyrophosphate phosphatase;Isoform 2 of Phospholysine phosphohistidine inorganic pyrophosphate phosphatase
-	1.00073	-0.287689	GALNT7	N-acetylgalactosaminyltransferase 7
-	1.24609	-0.286391	CTSB	Cathepsin B
-	0.558054	-0.285888	ADGRV1	Adhesion G-protein-coupled receptor V1;Adhesion G-protein-coupled receptor V1 (Fragment);Adhesion G-protein coupled receptor V1;Isoform 2 of Adhesion G-protein coupled receptor V1
-	2.22337	-0.285489	S100A4	Protein S100-A4
-	1.49303	-0.283644	PSMB8	Proteasome subunit beta type-8;Isoform 2 of Proteasome subunit beta type-8;Proteasome subunit beta
-	1.08259	-0.281641	SPTAN1	Spectrin alpha chain, non-erythrocytic 1;Isoform 3 of Spectrin alpha chain, non-erythrocytic 1
-	0.808545	-0.28155	PEBP4	Phosphatidylethanolamine-binding protein 4
-	1.54527	-0.279926	CD55	Complement decay-accelerating factor;Complement decay-accelerating factor (Fragment);Complement decay-accelerating factor;Complement decay-accelerating factor;Isoform 1 of Complement decay-accelerating factor;Isoform 3 of Complement decay-accelerating factor;Isoform 4 of Complement decay-accelerating factor;Isoform 5 of Complement decay-accelerating factor;Isoform 6 of Complement decay-accelerati…
-	1.20029	-0.279822	IGHA2	Immunoglobulin heavy constant alpha 2 (Fragment)
-	0.759928	-0.279791	ZG16B	Zymogen granule protein 16 homolog B
-	1.74559	-0.278454	SMS	Spermine synthase;Isoform 2 of Spermine synthase
-	1.47162	-0.276742	BAX	Apoptosis regulator BAX;Isoform Beta of Apoptosis regulator BAX;Isoform Epsilon of Apoptosis regulator BAX;Isoform Sigma of Apoptosis regulator BAX
-	1.11807	-0.275607	RARRES1	Retinoic acid receptor responder protein 1;Isoform 1 of Retinoic acid receptor responder protein 1
-	1.37383	-0.275055	BTD	Biotinidase;Isoform 2 of Biotinidase;Isoform 3 of Biotinidase;Isoform 4 of Biotinidase
-	1.01817	-0.275032	PTGES3	Prostaglandin E synthase 3;Prostaglandin E synthase 3;Isoform 3 of Prostaglandin E synthase 3;Isoform 4 of Prostaglandin E synthase 3
-	1.754	-0.274748	FKBP4	Peptidyl-prolyl cis-trans isomerase FKBP4
-	0.924002	-0.272888	HRG	Histidine-rich glycoprotein
-	1.14117	-0.272452	APOE	Apolipoprotein E
-	0.913872	-0.272166	ADH1C	Alcohol dehydrogenase 1C
-	1.09188	-0.270869	PRKCSH	Glucosidase 2 subunit beta;Glucosidase 2 subunit beta;Isoform 2 of Glucosidase 2 subunit beta
-	1.13511	-0.269735	PROM1	Prominin-1;Isoform 2 of Prominin-1;Isoform 3 of Prominin-1;Isoform 4 of Prominin-1;Isoform 5 of Prominin-1;Isoform 6 of Prominin-1;Isoform 7 of Prominin-1
-	2.04363	-0.266171	RPS27A	Ubiquitin-40S ribosomal protein S27a
-	0.848389	-0.26511	FOLR1	Folate receptor alpha
-	0.792076	-0.265089	TNFSF12-TNFSF13;TNFSF13;TNFSF12;TNFSF13;TNFSF13;TNFSF13;TNFSF13;TNFSF13	Protein TNFSF12-TNFSF13;Tumor necrosis factor ligand superfamily member 13;Isoform TWE-PRIL of Tumor necrosis factor ligand superfamily member 12;Tumor necrosis factor ligand superfamily member 13;Isoform Beta of Tumor necrosis factor ligand superfamily member 13;Isoform 4 of Tumor necrosis factor ligand superfamily member 13;Isoform 5 of Tumor necrosis factor ligand superfamily member 13;Tumor n…
-	0.988496	-0.262935	DSC2	Desmocollin-2;Isoform 2B of Desmocollin-2
-	0.90371	-0.262407	CHI3L2	Chitinase-3-like protein 2;Isoform 3 of Chitinase-3-like protein 2
-	1.51553	-0.26089	MYH9	Myosin-9
-	1.03781	-0.258939	SDCBP	Isoform 2 of Syntenin-1
-	0.845675	-0.257804	CALML5	Calmodulin-like protein 5
-	0.803851	-0.257478	MUC16	Mucin-16
-	1.42077	-0.256622	GNAI2	Guanine nucleotide-binding protein G(i) subunit alpha-2;Isoform 2 of Guanine nucleotide-binding protein G(i) subunit alpha-2;Isoform 3 of Guanine nucleotide-binding protein G(i) subunit alpha-2;Isoform sGi2 of Guanine nucleotide-binding protein G(i) subunit alpha-2;Isoform 5 of Guanine nucleotide-binding protein G(i) subunit alpha-2;Isoform 6 of Guanine nucleotide-binding protein G(i) subunit alp…
-	0.935022	-0.254252	FGA	Fibrinogen alpha chain;Isoform 2 of Fibrinogen alpha chain
-	1.42739	-0.25352	APOBEC3A	DNA dC->dU-editing enzyme APOBEC-3A
-	0.589461	-0.252792	CST1	Cystatin-SN
-	0.843873	-0.243141	PLTP	Phospholipid transfer protein
-	0.866968	-0.242658	SERPIND1	Heparin cofactor 2
-	1.8647	-0.241563	HPRT1	Hypoxanthine-guanine phosphoribosyltransferase
-	0.782525	-0.239538	LSR	Lipolysis-stimulated lipoprotein receptor;Isoform 4 of Lipolysis-stimulated lipoprotein receptor;Isoform 5 of Lipolysis-stimulated lipoprotein receptor;Isoform 6 of Lipolysis-stimulated lipoprotein receptor;Lipolysis-stimulated lipoprotein receptor
-	2.24828	-0.238916	PFKP	ATP-dependent 6-phosphofructokinase, platelet type
-	1.55262	-0.237931	SERPING1	Plasma protease C1 inhibitor;Plasma protease C1 inhibitor;Isoform 2 of Plasma protease C1 inhibitor;Isoform 3 of Plasma protease C1 inhibitor
-	0.797355	-0.237302	IGLV7-43	Immunoglobulin lambda variable 7-43
-	0.698313	-0.236918	HSPG2	Basement membrane-specific heparan sulfate proteoglycan core protein
-	1.07102	-0.235538	RPL30	60S ribosomal protein L30 (Fragment);60S ribosomal protein L30
-	1.00114	-0.234297	ATRN	Attractin;Isoform 2 of Attractin;Isoform 3 of Attractin
-	1.35183	-0.233927	CRYL1	Lambda-crystallin homolog;Isoform 2 of Lambda-crystallin homolog
-	0.862231	-0.225917	C9	Complement component C9
-	1.56063	-0.225209	LDHB	L-lactate dehydrogenase B chain
-	0.660568	-0.225149	NUCB1	Nucleobindin-1
-	0.858142	-0.22371	FGB	Fibrinogen beta chain
-	0.721156	-0.222287	DNAJC3	DnaJ homolog subfamily C member 3
-	1.6034	-0.222036	MYH14	Isoform 6 of Myosin-14
-	0.545943	-0.220634	CST4	Cystatin-S
-	0.883746	-0.219766	HPX	Hemopexin
-	0.584787	-0.219733	NEU1	Sialidase-1
-	1.18285	-0.219187	STK26	Serine/threonine-protein kinase 26
-	2.25447	-0.218964	SERPINB6	Serpin B6
-	0.701366	-0.218662	ANG	Angiogenin
-	0.668379	-0.217522	MELTF	Melanotransferrin
-	1.50564	-0.214116	RABGGTA	Geranylgeranyl transferase type-2 subunit alpha
-	0.661483	-0.211837	SDF4	45 kDa calcium-binding protein
-	0.631377	-0.21044	ORM2	Alpha-1-acid glycoprotein 2
-	1.59348	-0.209904	RHOC	Rho-related GTP-binding protein RhoC;Rho-related GTP-binding protein RhoC (Fragment)
-	0.712814	-0.209821	APOH	Beta-2-glycoprotein 1
-	0.770343	-0.205543	THBS1	Thrombospondin-1
-	0.6445	-0.204346	AFM	Afamin
-	0.822695	-0.203814	KNG1	Isoform LMW of Kininogen-1
-	1.04316	-0.201412	AP2A2	AP-2 complex subunit alpha-2
-	0.499713	-0.200122	LAMP2	Lysosome-associated membrane glycoprotein 2;Isoform LAMP-2B of Lysosome-associated membrane glycoprotein 2;Isoform LAMP-2C of Lysosome-associated membrane glycoprotein 2
-	2.58317	-0.200032	NSF	Vesicle-fusing ATPase
-	0.836853	-0.199248	PPIB	Peptidyl-prolyl cis-trans isomerase B
-	0.646428	-0.198282	IGHG1	Immunoglobulin heavy constant gamma 1 (Fragment);Immunoglobulin heavy constant gamma 1
-	0.981847	-0.195297	P4HB	Protein disulfide-isomerase
-	1.47896	-0.194646	PSME1	Proteasome activator complex subunit 1
-	0.793194	-0.19459	PDCD10	Programmed cell death protein 10
-	1.12629	-0.194438	PAICS	Multifunctional protein ADE2 (Fragment);Multifunctional protein ADE2;Isoform 2 of Multifunctional protein ADE2
-	1.05312	-0.191878	ACSS2	Acetyl-coenzyme A synthetase, cytoplasmic;Isoform 2 of Acetyl-coenzyme A synthetase, cytoplasmic
-	0.530146	-0.190431	APOB	Apolipoprotein B-100
-	0.674915	-0.190091	CTSC	Dipeptidyl peptidase 1
-	0.568769	-0.188474	IGKV3D-20	Immunoglobulin kappa variable 3D-20
-	0.605491	-0.188088	FLNB	Filamin-B;Isoform 2 of Filamin-B;Isoform 8 of Filamin-B;Isoform 9 of Filamin-B
-	1.07331	-0.187107	DPP3	Dipeptidyl peptidase 3
-	0.280776	-0.185468	CTNNA1	Catenin alpha-1;Isoform 2 of Catenin alpha-1
-	0.938782	-0.185281	RPLP0	60S acidic ribosomal protein P0;60S acidic ribosomal protein P0;Isoform 2 of 60S acidic ribosomal protein P0
-	1.34773	-0.181365	PSMB3	Proteasome subunit beta type-3 (Fragment);Proteasome subunit beta type-3
-	2.14387	-0.180942	PFN1	Profilin-1
-	0.529048	-0.179123	IGHV1-18	Immunoglobulin heavy variable 1-18
-	0.296833	-0.177995	PSCA	Prostate stem cell antigen
-	2.35623	-0.177788	RNPEP	Aminopeptidase B
-	0.905722	-0.177477	EPS8L1	Epidermal growth factor receptor kinase substrate 8-like protein 1
-	0.905541	-0.177342	YARS	Tyrosine--tRNA ligase, cytoplasmic
-	0.730556	-0.177338	EHD3	EH domain-containing protein 3
-	2.17722	-0.176713	GLO1	Lactoylglutathione lyase;Isoform 2 of Lactoylglutathione lyase
-	1.01657	-0.176561	SWAP70	Switch-associated protein 70
-	0.876361	-0.176506	TXN	Thioredoxin
-	0.562556	-0.175723	STOM	Erythrocyte band 7 integral membrane protein
-	0.98938	-0.175536	DDX1	ATP-dependent RNA helicase DDX1
-	0.592314	-0.174821	TF	Serotransferrin
-	1.0843	-0.174626	CTPS1	CTP synthase;CTP synthase 1
-	0.541414	-0.173495	PLG	Plasminogen
-	0.377105	-0.170659	ST3GAL1	CMP-N-acetylneuraminate-beta-galactosamide-alpha-2,3-sialyltransferase 1
-	0.473336	-0.169593	MANBA	Beta-mannosidase
-	0.603757	-0.165694	AGR2	Anterior gradient protein 2 homolog
-	1.71204	-0.165123	EIF4A1	Eukaryotic initiation factor 4A-I
-	0.462038	-0.164959	B2M	Beta-2-microglobulin
-	0.588936	-0.164714	KRT19	Keratin, type I cytoskeletal 19
-	0.20092	-0.164603	IGHV1-69	Immunoglobulin heavy variable 1-69
-	0.526626	-0.164087	AMBP	Protein AMBP
-	0.908628	-0.161846	CARHSP1	Calcium-regulated heat-stable protein 1
-	0.719773	-0.161642	C3	Complement C3
-	0.452789	-0.159711	IGLL5	Immunoglobulin lambda-like polypeptide 5
-	0.520292	-0.158573	IGKV1-17	Immunoglobulin kappa variable 1-17
-	0.812735	-0.154991	RHOA	Transforming protein RhoA
-	0.981304	-0.1549	SLC9A3R1	Na(+)/H(+) exchange regulatory cofactor NHE-RF1
-	0.449294	-0.154286	PON1	Serum paraoxonase/arylesterase 1
-	0.711778	-0.153086	PTER	Phosphotriesterase-related protein;Isoform 2 of Phosphotriesterase-related protein
-	0.662139	-0.152124	MUC5AC	Mucin-5AC
-	0.515227	-0.151515	SERPINA1	Alpha-1-antitrypsin
-	1.31674	-0.151495	GSTO1	Glutathione S-transferase omega-1
-	0.814135	-0.151133	ALDH1L1	Cytosolic 10-formyltetrahydrofolate dehydrogenase;Isoform 3 of Cytosolic 10-formyltetrahydrofolate dehydrogenase
-	3.16486	-0.150818	TUBB	Tubulin beta chain
-	0.461528	-0.148727	PTGDS	Prostaglandin-H2 D-isomerase
-	0.939679	-0.146466	ARPC3	Actin-related protein 2/3 complex subunit 3
-	1.55276	-0.145751	RDX	Radixin;Radixin;Isoform 5 of Radixin
-	0.893816	-0.145302	AARS	Alanine--tRNA ligase, cytoplasmic
-	1.69641	-0.144374	NPEPPS	Aminopeptidase;Puromycin-sensitive aminopeptidase
-	0.954775	-0.143539	ABHD14B	Protein ABHD14B
-	1.6437	-0.142957	CAND1	Cullin-associated NEDD8-dissociated protein 1
-	0.471173	-0.14187	STAT1	Signal transducer and activator of transcription 1-alpha/beta
-	0.936736	-0.139204	PSMC3	26S proteasome regulatory subunit 6A
-	1.23582	-0.138905	GFPT1	Glutamine--fructose-6-phosphate aminotransferase [isomerizing] 1;Isoform 2 of Glutamine--fructose-6-phosphate aminotransferase [isomerizing] 1
-	0.649866	-0.137235	HSP90B1	Endoplasmin
-	0.837128	-0.137022	DNM2	Dynamin-2;Isoform 4 of Dynamin-2;Isoform 5 of Dynamin-2
-	0.3295	-0.136528	S100P	Protein S100-P
-	1.30877	-0.136303	NME2;NME1-NME2	Isoform 3 of Nucleoside diphosphate kinase B;Nucleoside diphosphate kinase
-	0.954741	-0.135336	STIP1	Stress-induced-phosphoprotein 1
-	0.820354	-0.134233	MYO6	Myosin VI transcript variant 007
-	0.532021	-0.134043	TPM3	Isoform 2 of Tropomyosin alpha-3 chain
-	0.907039	-0.133956	ALAD	Delta-aminolevulinic acid dehydratase
-	0.528016	-0.132997	ATP6V1H	V-type proton ATPase subunit H;Isoform 2 of V-type proton ATPase subunit H
-	0.251733	-0.132673	IGLV3-27	Immunoglobulin lambda variable 3-27
-	0.35499	-0.132569	CTBS	Di-N-acetylchitobiase
-	0.562679	-0.132536	PSMD2	26S proteasome non-ATPase regulatory subunit 2
-	1.23513	-0.132063	PGD	6-phosphogluconate dehydrogenase, decarboxylating;Isoform 2 of 6-phosphogluconate dehydrogenase, decarboxylating
-	0.638049	-0.13187	STARD10	START domain-containing protein 10 (Fragment);START domain-containing protein 10;START domain-containing protein 10
-	1.94683	-0.129472	PGK1	Phosphoglycerate kinase 1
-	0.63931	-0.129183	ENOPH1	Enolase-phosphatase E1
-	0.803358	-0.12873	EFHD2	EF-hand domain-containing protein D2
-	0.194912	-0.128627	F5	Coagulation factor V
-	0.627692	-0.128546	ALDH3A1	Aldehyde dehydrogenase, dimeric NADP-preferring
-	0.817743	-0.12815	TKFC	Triokinase/FMN cyclase
-	0.55666	-0.127789	TRIM16	Tripartite motif-containing protein 16
-	1.17323	-0.127746	GPI	Glucose-6-phosphate isomerase;Glucose-6-phosphate isomerase;Isoform 2 of Glucose-6-phosphate isomerase
-	0.283138	-0.126564	IGKV1-5	Immunoglobulin kappa variable 1-5
-	0.526726	-0.12653	ALB	Serum albumin
-	0.533291	-0.125359	COPB2	Coatomer subunit beta';Isoform 2 of Coatomer subunit beta'
-	1.09441	-0.125008	CBR1	Carbonyl reductase [NADPH] 1
-	1.13841	-0.124708	ARHGDIA	Rho GDP-dissociation inhibitor 1 (Fragment);Rho GDP-dissociation inhibitor 1;Rho GDP-dissociation inhibitor 1
-	0.88999	-0.124117	SCIN	Adseverin
-	0.670985	-0.123191	ACO1	Cytoplasmic aconitate hydratase
-	0.472932	-0.122534	RPL18	60S ribosomal protein L18;60S ribosomal protein L18 (Fragment);60S ribosomal protein L18 (Fragment);60S ribosomal protein L18;Isoform 2 of 60S ribosomal protein L18
-	0.427806	-0.122161	HEXA	Beta-hexosaminidase;Beta-hexosaminidase;Beta-hexosaminidase subunit alpha
-	0.380541	-0.121886	TPP1	Tripeptidyl-peptidase 1
-	0.541648	-0.121477	PSMB10	Proteasome subunit beta type-10
-	0.999151	-0.121175	TAGLN2	Transgelin-2;Isoform 2 of Transgelin-2
-	0.421075	-0.120913	RAP1A	Ras-related protein Rap-1A
-	0.307858	-0.12044	TTR	Transthyretin
-	0.784134	-0.120128	NAPA	Alpha-soluble NSF attachment protein
-	0.551473	-0.119943	LASP1	LIM and SH3 domain protein 1;Isoform 2 of LIM and SH3 domain protein 1
-	0.527459	-0.119932	PSMD3	26S proteasome non-ATPase regulatory subunit 3
-	0.447835	-0.119146	VBP1	Prefoldin subunit 3;Isoform 2 of Prefoldin subunit 3
-	1.21164	-0.119121	ARF3;ARF1	ADP-ribosylation factor 3;ADP-ribosylation factor 1
-	1.25678	-0.118598	TCP1	T-complex protein 1 subunit alpha
-	0.53724	-0.117547	CYFIP1	Cytoplasmic FMR1-interacting protein 1
-	0.275061	-0.117339	AHCYL1	S-adenosylhomocysteine hydrolase-like protein 1
-	0.35812	-0.116976	EIF4H	Eukaryotic translation initiation factor 4H;Isoform Short of Eukaryotic translation initiation factor 4H
-	0.621073	-0.116319	PSMD11	26S proteasome non-ATPase regulatory subunit 11;Isoform 2 of 26S proteasome non-ATPase regulatory subunit 11
-	0.297013	-0.115423	ITIH4	Inter-alpha-trypsin inhibitor heavy chain H4
-	0.612932	-0.115096	ANXA4	Annexin A4
-	0.204649	-0.115096	IGLV8-61	Immunoglobulin lambda variable 8-61
-	0.357922	-0.114573	CANT1	Soluble calcium-activated nucleotidase 1;Isoform 3 of Soluble calcium-activated nucleotidase 1
-	0.747757	-0.114488	EIF5A	Eukaryotic translation initiation factor 5A (Fragment);Eukaryotic translation initiation factor 5A-1;Eukaryotic translation initiation factor 5A-1;Isoform 2 of Eukaryotic translation initiation factor 5A-1
-	0.45119	-0.11374	NIT1	Isoform 1 of Deaminated glutathione amidase
-	0.412008	-0.113465	AKR1C1	Aldo-keto reductase family 1 member C1
-	0.57919	-0.113345	OTUB1	Ubiquitin thioesterase OTUB1;Ubiquitin thioesterase;Ubiquitin thioesterase OTUB1
-	0.272766	-0.112791	LUM	Lumican
-	0.290236	-0.112727	CTSZ	Cathepsin Z
-	0.573752	-0.111805	CSTB	Cystatin-B
-	0.697436	-0.111488	RPS6KA3	Ribosomal protein S6 kinase alpha-3
-	0.28963	-0.110638	ITIH1	Inter-alpha-trypsin inhibitor heavy chain H1
-	0.517753	-0.109624	UBA7	Ubiquitin-like modifier-activating enzyme 7
-	0.47507	-0.109459	OSBP	Oxysterol-binding protein 1
-	0.465173	-0.107555	PBDC1	Protein PBDC1
-	0.670703	-0.106983	SARS;SARS1	Serine--tRNA ligase, cytoplasmic;Seryl-tRNA synthetase 1
-	0.303949	-0.106962	CD14	Monocyte differentiation antigen CD14
-	0.519092	-0.106852	CFH	Complement factor H
-	0.503211	-0.106358	GALE	UDP-glucose 4-epimerase
-	0.650975	-0.105685	ADH7	All-trans-retinol dehydrogenase [NAD(+)] ADH7
-	0.439669	-0.10496	IL18	Interleukin-18;Isoform 2 of Interleukin-18
-	0.660188	-0.104936	IQGAP1	Ras GTPase-activating-like protein IQGAP1
-	0.421867	-0.103409	TPM4	Tropomyosin alpha-4 chain
-	0.329132	-0.103188	NPC2	NPC intracellular cholesterol transporter 2;NPC intracellular cholesterol transporter 2 (Fragment);NPC intracellular cholesterol transporter 2;NPC intracellular cholesterol transporter 2;NPC intracellular cholesterol transporter 2
-	0.609616	-0.099908	PLIN3	Perilipin-3;Isoform 4 of Perilipin-3
-	0.298819	-0.099634	GPX3	Glutathione peroxidase;Glutathione peroxidase 3
-	0.431708	-0.0991543	TGM2	Protein-glutamine gamma-glutamyltransferase 2
-	0.34682	-0.0991104	CASP7	Caspase-7;Isoform Alpha' of Caspase-7
-	0.193948	-0.0987146	CEACAM5	Carcinoembryonic antigen-related cell adhesion molecule 5;Carcinoembryonic antigen-related cell adhesion molecule 5;Carcinoembryonic antigen-related cell adhesion molecule 5;Isoform 2 of Carcinoembryonic antigen-related cell adhesion molecule 5
-	0.282637	-0.0975904	SOD1	Superoxide dismutase [Cu-Zn]
-	0.433851	-0.0972918	TXNRD1	Thioredoxin reductase 1, cytoplasmic;Thioredoxin reductase 1, cytoplasmic;Thioredoxin reductase 1, cytoplasmic;Thioredoxin reductase 1, cytoplasmic;Thioredoxin reductase 1, cytoplasmic;Thioredoxin reductase 1, cytoplasmic;Isoform 2 of Thioredoxin reductase 1, cytoplasmic;Isoform 3 of Thioredoxin reductase 1, cytoplasmic;Isoform 4 of Thioredoxin reductase 1, cytoplasmic;Isoform 5 of Thioredoxin re…
-	0.516998	-0.0961301	XPNPEP1	Isoform 3 of Xaa-Pro aminopeptidase 1
-	0.758987	-0.0946401	PARK7	Protein/nucleic acid deglycase DJ-1
-	0.813368	-0.0934716	CMPK1	UMP-CMP kinase;Isoform 3 of UMP-CMP kinase
-	0.230606	-0.0931293	EIF4G1	Eukaryotic translation initiation factor 4 gamma 1;Eukaryotic translation initiation factor 4 gamma 1;Eukaryotic translation initiation factor 4 gamma 1;Eukaryotic translation initiation factor 4 gamma 1;Isoform B of Eukaryotic translation initiation factor 4 gamma 1;Isoform C of Eukaryotic translation initiation factor 4 gamma 1;Isoform D of Eukaryotic translation initiation factor 4 gamma 1;Iso…
-	1.03945	-0.0926348	IDH1	Isocitrate dehydrogenase [NADP] cytoplasmic
-	0.645647	-0.0918708	CLTC	Clathrin heavy chain;Clathrin heavy chain 1;Isoform 2 of Clathrin heavy chain 1
-	0.781321	-0.091721	GSR	Glutathione reductase, mitochondrial;Isoform Cytoplasmic of Glutathione reductase, mitochondrial
-	0.413949	-0.089251	PSMD14	26S proteasome non-ATPase regulatory subunit 14
-	0.185671	-0.089145	;TGM3	TGc domain-containing protein;Protein-glutamine gamma-glutamyltransferase E
-	0.81248	-0.0887059	CLIC1	Chloride intracellular channel protein 1
-	0.29016	-0.0882202	FUCA1	Tissue alpha-L-fucosidase
-	0.60172	-0.0878265	HSPA4	Heat shock 70 kDa protein 4
-	0.346898	-0.0853707	PDLIM5	PDZ and LIM domain protein 5
-	0.405825	-0.0852123	PDLIM1	PDZ and LIM domain protein 1
-	0.356436	-0.0852019	PTGR1	Prostaglandin reductase 1;Prostaglandin reductase 1;Isoform 2 of Prostaglandin reductase 1
-	0.329528	-0.0847567	CFI	Complement factor I
-	0.17874	-0.0837937	IGHM	Immunoglobulin heavy constant mu
-	0.21645	-0.0836002	PRPS1	Ribose-phosphate pyrophosphokinase;Ribose-phosphate pyrophosphokinase 1;Ribose-phosphate pyrophosphokinase 1
-	0.863563	-0.0822243	ACTR3	Actin-related protein 3
-	0.21837	-0.0815155	XDH	Xanthine dehydrogenase/oxidase
-	0.518677	-0.0812127	WDR1	WD repeat-containing protein 1
-	0.799293	-0.0795237	PPIA	Peptidyl-prolyl cis-trans isomerase A
-	0.168863	-0.0793951	LPO	Lactoperoxidase
-	0.424207	-0.0793579	ENO2	Gamma-enolase;Gamma-enolase;Isoform 2 of Gamma-enolase
-	0.235239	-0.0790284	DNPH1	2'-deoxynucleoside 5'-phosphate N-hydrolase 1 (Fragment);2'-deoxynucleoside 5'-phosphate N-hydrolase 1
-	0.340146	-0.0780808	TPT1	Translationally-controlled tumor protein
-	0.441482	-0.0778646	CFL1	Cofilin-1
-	0.433516	-0.077682	PTPA	Serine/threonine-protein phosphatase 2A activator;Serine/threonine-protein phosphatase 2A activator;Serine/threonine-protein phosphatase 2A activator;Isoform 1 of Serine/threonine-protein phosphatase 2A activator
-	0.244686	-0.0754981	F2	Prothrombin
-	0.520881	-0.0753346	CCT6A	T-complex protein 1 subunit zeta
-	0.306965	-0.0750133	IL1RN	Isoform 2 of Interleukin-1 receptor antagonist protein
-	0.33545	-0.0748019	ETF1	Eukaryotic peptide chain release factor subunit 1;Eukaryotic peptide chain release factor subunit 1;Isoform 2 of Eukaryotic peptide chain release factor subunit 1
-	0.296516	-0.0729461	PSMA2	Proteasome subunit alpha type;Proteasome subunit alpha type-2
-	0.217626	-0.0726912	RAB25	Ras-related protein Rab-25
-	0.117388	-0.0723438	TBCA	Tubulin-specific chaperone A
-	0.532463	-0.0714945	CAPN2	Calpain-2 catalytic subunit
-	0.385592	-0.0707588	SHMT1	Serine hydroxymethyltransferase, cytosolic;Isoform 2 of Serine hydroxymethyltransferase, cytosolic
-	0.515376	-0.069555	ACTR2	Actin-related protein 2
-	0.184181	-0.0692967	AKR1C2	Aldo-keto reductase family 1 member C2
-	0.326624	-0.0688405	GALM	Aldose 1-epimerase
-	0.242792	-0.068658	AHSG	Alpha-2-HS-glycoprotein
-	0.207732	-0.0678401	ASAH1	Acid ceramidase;Acid ceramidase;Acid ceramidase;Acid ceramidase;Acid ceramidase;Acid ceramidase;Acid ceramidase (Fragment);Acid ceramidase;Acid ceramidase;Acid ceramidase;Isoform 2 of Acid ceramidase
-	0.198466	-0.0666056	RAB5C	Ras-related protein Rab-5C;Isoform 2 of Ras-related protein Rab-5C
-	0.225777	-0.0665513	KYNU	Kynureninase
-	0.307046	-0.0658738	PAFAH1B1	Platelet-activating factor acetylhydrolase IB subunit alpha
-	0.228836	-0.0658423	ACAT2	Acetyl-CoA acetyltransferase, cytosolic
-	0.186273	-0.065559	STEAP4	Metalloreductase STEAP4
-	0.451742	-0.0654807	PRDX6	Peroxiredoxin-6
-	0.102649	-0.0651649	FLG2	Filaggrin-2
-	0.2859	-0.0651162	ATIC	Bifunctional purine biosynthesis protein PURH
-	0.203878	-0.064635	PSMB9	Proteasome subunit beta;Proteasome subunit beta;Proteasome subunit beta type-9;Isoform LMP2.S of Proteasome subunit beta type-9
-	0.493277	-0.0642809	PEBP1	Phosphatidylethanolamine-binding protein 1
-	0.205795	-0.0640075	RPS9	40S ribosomal protein S9
-	0.455246	-0.063053	G6PD	Glucose-6-phosphate 1-dehydrogenase;Isoform Long of Glucose-6-phosphate 1-dehydrogenase
-	0.137843	-0.0620088	DSG1	Desmoglein-1
-	0.27472	-0.0620074	C12orf10	UPF0160 protein MYG1, mitochondrial
-	0.258936	-0.0616441	TARS1	Threonine--tRNA ligase 1, cytoplasmic;Isoform 2 of Threonine--tRNA ligase 1, cytoplasmic
-	0.298882	-0.0611521	CAPG	Macrophage-capping protein
-	0.193617	-0.060843	PNP	Purine nucleoside phosphorylase
-	0.288182	-0.0602145	CAP1	Adenylyl cyclase-associated protein 1;Isoform 2 of Adenylyl cyclase-associated protein 1
-	0.139985	-0.0596979	MVP	Major vault protein
-	0.212675	-0.0594941	SSH3	Protein phosphatase Slingshot homolog 3
-	0.184176	-0.0583001	RPL13	60S ribosomal protein L13
-	0.296601	-0.0581939	VWA5A	von Willebrand factor A domain-containing protein 5A
-	0.360384	-0.0553396	ALDH9A1	4-trimethylaminobutyraldehyde dehydrogenase
-	0.349656	-0.0544803	PCBP1	Poly(rC)-binding protein 1
-	0.154906	-0.0532177	CPNE3	Copine-3
-	0.138156	-0.0524131	AGT	Angiotensinogen
-	0.256472	-0.0522507	ARPC2	Actin-related protein 2/3 complex subunit 2
-	0.100819	-0.051523	PDGFC	Platelet-derived growth factor C
-	0.159085	-0.0509208	DDT	D-dopachrome decarboxylase
-	0.436224	-0.0504846	UGP2	UTP--glucose-1-phosphate uridylyltransferase
-	0.170067	-0.0503713	DPYD	Dihydropyrimidine dehydrogenase [NADP(+)]
-	0.174676	-0.0499748	HNRNPK	Heterogeneous nuclear ribonucleoprotein K;Isoform 2 of Heterogeneous nuclear ribonucleoprotein K;Isoform 3 of Heterogeneous nuclear ribonucleoprotein K
-	0.143939	-0.048955	RPL6	60S ribosomal protein L6
-	0.328123	-0.0489411	PGAM1	Phosphoglycerate mutase 1
-	0.155904	-0.0487275	IDE	Insulin-degrading enzyme
-	0.119107	-0.0483198	MUC1	Mucin-1 (Fragment);Mucin-1;Mucin-1;Mucin-1;Mucin-1;Mucin-1;Mucin-1;Mucin-1;Isoform Y-LSP of Mucin-1;Isoform J13 of Mucin-1;Isoform 2 of Mucin-1;Isoform 3 of Mucin-1;Isoform 4 of Mucin-1;Isoform Y of Mucin-1;Isoform 8 of Mucin-1
-	0.104228	-0.0474333	LYZ	Lysozyme C
-	0.0742556	-0.0468954	IGKV6-21	Immunoglobulin kappa variable 6-21
-	0.208795	-0.0457673	PPA1	Inorganic pyrophosphatase
-	0.172637	-0.0452567	EIF4E	Eukaryotic translation initiation factor 4E;Eukaryotic translation initiation factor 4E;Isoform 2 of Eukaryotic translation initiation factor 4E;Isoform 3 of Eukaryotic translation initiation factor 4E
-	0.163677	-0.045123	MX1	Interferon-induced GTP-binding protein Mx1
-	0.181616	-0.0449343	CCT5	T-complex protein 1 subunit epsilon
-	0.0763333	-0.0443342	GBA	Glucosylceramidase;Glucosylceramidase;Lysosomal acid glucosylceramidase;Isoform Short of Lysosomal acid glucosylceramidase;Isoform 4 of Lysosomal acid glucosylceramidase
-	0.208407	-0.0442411	SNX2	Sorting nexin-2
-	0.215494	-0.0440714	AKR7A2	Aflatoxin B1 aldehyde reductase member 2 (Fragment);Aflatoxin B1 aldehyde reductase member 2
-	0.221725	-0.0439486	ANXA11	Annexin A11;Isoform 2 of Annexin A11
-	0.15383	-0.0433597	UAP1	UDP-N-acetylhexosamine pyrophosphorylase;Isoform 3 of UDP-N-acetylhexosamine pyrophosphorylase
-	0.106053	-0.0431338	KRT8	Keratin, type II cytoskeletal 8;Isoform 2 of Keratin, type II cytoskeletal 8
-	0.161436	-0.0430995	EIF3B	Eukaryotic translation initiation factor 3 subunit B;Isoform 2 of Eukaryotic translation initiation factor 3 subunit B
-	0.137925	-0.042033	AP1S1	AP complex subunit sigma;AP complex subunit sigma (Fragment);AP-1 complex subunit sigma-1A
-	0.194616	-0.041423	ARCN1	Coatomer subunit delta
-	0.175801	-0.0412704	STK39	STE20/SPS1-related proline-alanine-rich protein kinase;Isoform 2 of STE20/SPS1-related proline-alanine-rich protein kinase
-	0.147519	-0.0408066	SERPINB2	Plasminogen activator inhibitor 2
-	0.237212	-0.0405292	GMPPB	Mannose-1-phosphate guanyltransferase beta;Isoform 2 of Mannose-1-phosphate guanyltransferase beta
-	0.314104	-0.0399516	AKR1A1	Aldo-keto reductase family 1 member A1
-	0.122234	-0.0396626	HSPA5	Endoplasmic reticulum chaperone BiP
-	0.144889	-0.038769	EIF3F	Eukaryotic translation initiation factor 3 subunit F
-	0.139665	-0.0373118	COPA	Coatomer subunit alpha;Isoform 2 of Coatomer subunit alpha
-	0.191905	-0.0366918	CAPZB	Isoform 2 of F-actin-capping protein subunit beta
-	0.266185	-0.0364485	LTA4H	Leukotriene A-4 hydrolase
-	0.173023	-0.0356307	NIBAN2	Protein Niban 2;Isoform 2 of Protein Niban 2
-	0.10756	-0.0342062	VPS26A	Vacuolar protein sorting-associated protein 26A
-	0.120457	-0.0340041	PPP2CA	Serine/threonine-protein phosphatase 2A catalytic subunit alpha isoform
-	0.170696	-0.0338527	SELENBP1	Methanethiol oxidase;Isoform 4 of Methanethiol oxidase
-	0.141335	-0.0329054	FASN	Fatty acid synthase
-	0.249883	-0.0326501	ARPC4-TTLL3;ARPC4	Actin-related protein 2/3 complex subunit 4
-	0.125832	-0.0325865	COMT	Catechol O-methyltransferase;Isoform Soluble of Catechol O-methyltransferase
-	0.103727	-0.0325758	AP1B1	Isoform C of AP-1 complex subunit beta-1
-	0.152831	-0.0325145	GPX1	Glutathione peroxidase;Glutathione peroxidase 1
-	0.117775	-0.0321474	FH	Fumarate hydratase, mitochondrial;Isoform Cytoplasmic of Fumarate hydratase, mitochondrial
-	0.103081	-0.0316306	CRYZ	Quinone oxidoreductase
-	0.109287	-0.0313968	PSMD1	26S proteasome non-ATPase regulatory subunit 1
-	0.0851758	-0.0312762	FAM49B	Protein FAM49B
-	0.116082	-0.0301442	NAMPT	Nicotinamide phosphoribosyltransferase
-	0.0727163	-0.0300741	A1BG	Alpha-1B-glycoprotein
-	0.139389	-0.0300189	HSP90AB1	Heat shock protein HSP 90-beta
-	0.0784238	-0.0283938	PRKCD	Protein kinase C delta type;Isoform 2 of Protein kinase C delta type
-	0.0566731	-0.0282776	SDC1	Syndecan-1;Syndecan-1 (Fragment);Syndecan-1
-	0.258554	-0.0269049	AHCY	Adenosylhomocysteinase
-	0.0902837	-0.0258674	RACK1	Receptor of activated protein C kinase 1
-	0.177173	-0.0258604	GAPDH	Glyceraldehyde-3-phosphate dehydrogenase
-	0.149539	-0.0257723	PRDX5	Peroxiredoxin-5, mitochondrial;Isoform Cytoplasmic+peroxisomal of Peroxiredoxin-5, mitochondrial
-	0.0797634	-0.0241741	LRRC47	Leucine-rich repeat-containing protein 47
-	0.0593306	-0.023558	BAG1	BAG family molecular chaperone regulator 1;BAG family molecular chaperone regulator 1;Isoform 2 of BAG family molecular chaperone regulator 1;Isoform 3 of BAG family molecular chaperone regulator 1;Isoform 4 of BAG family molecular chaperone regulator 1
-	0.0650231	-0.0223763	DARS	Aspartate--tRNA ligase, cytoplasmic
-	0.0536418	-0.0221873	CAST	Calpastatin;Calpastatin;Calpastatin (Fragment);Calpastatin;Calpastatin;Calpastatin;Isoform 10 of Calpastatin;Isoform 2 of Calpastatin;Isoform 3 of Calpastatin;Isoform 4 of Calpastatin;Isoform 5 of Calpastatin;Isoform 6 of Calpastatin;Isoform 7 of Calpastatin;Isoform 8 of Calpastatin;Isoform 9 of Calpastatin
-	0.0977274	-0.021949	CAPZA1	F-actin-capping protein subunit alpha-1
-	0.0526594	-0.0215842	APOA1	Apolipoprotein A-I
-	0.0698192	-0.0208696	SEC31A	Protein transport protein Sec31A;Protein transport protein Sec31A;Isoform 10 of Protein transport protein Sec31A;Isoform 2 of Protein transport protein Sec31A;Isoform 3 of Protein transport protein Sec31A;Isoform 4 of Protein transport protein Sec31A;Isoform 6 of Protein transport protein Sec31A;Isoform 8 of Protein transport protein Sec31A;Isoform 9 of Protein transport protein Sec31A
-	0.118688	-0.0198272	LDHA	L-lactate dehydrogenase A chain
-	0.0422773	-0.0196534	IGLV1-40	Immunoglobulin lambda variable 1-40
-	0.125795	-0.0194104	PLS3	Plastin-3
-	0.0612084	-0.0193657	EIF2S1	Eukaryotic translation initiation factor 2 subunit 1
-	0.106315	-0.01848	UBA1	Ubiquitin-like modifier-activating enzyme 1;Isoform 2 of Ubiquitin-like modifier-activating enzyme 1
-	0.066603	-0.0184428	RTCB	RNA-splicing ligase RtcB homolog
-	0.0528587	-0.0180379	KIF5B	Kinesin-1 heavy chain
-	0.0481221	-0.0177023	GSDMB	Gasdermin-B;Isoform 2 of Gasdermin-B;Isoform 3 of Gasdermin-B;Isoform 4 of Gasdermin-B;Isoform 6 of Gasdermin-B
-	0.0595411	-0.0177015	GART	Trifunctional purine biosynthetic protein adenosine-3
-	0.0694463	-0.0166437	PSMA6	Proteasome subunit alpha type;Proteasome subunit alpha type;Proteasome subunit alpha type-6
-	0.0303245	-0.0155158	IGLV1-51	Immunoglobulin lambda variable 1-51
-	0.0426988	-0.0148919	GSTZ1	Maleylacetoacetate isomerase
-	0.0582071	-0.0146972	NANS	Sialic acid synthase
-	0.0582661	-0.0140424	ANXA7	Annexin A7;Isoform 2 of Annexin A7
-	0.0900177	-0.013798	CAPN1	Calpain-1 catalytic subunit
-	0.0475421	-0.012987	NCCRP1	F-box only protein 50
-	0.0392298	-0.0127595	TUBA4B	Putative tubulin-like protein alpha-4B
-	0.0405682	-0.0126384	TKT	Transketolase;Isoform 2 of Transketolase
-	0.0675237	-0.0123813	ATP6V1A	V-type proton ATPase catalytic subunit A;Isoform 2 of V-type proton ATPase catalytic subunit A
-	0.0432488	-0.012257	TJP2;;TJP2;TJP2;TJP2;TJP2;TJP2	Tight junction protein ZO-2;Uncharacterized protein;Tight junction protein ZO-2;Tight junction protein ZO-2 (Fragment);Tight junction protein ZO-2;Isoform C1 of Tight junction protein ZO-2;Isoform 7 of Tight junction protein ZO-2
-	0.0316664	-0.0119813	ARPC5L	Actin-related protein 2/3 complex subunit 5-like protein
-	0.0423942	-0.0119022	DNPEP	Aspartyl aminopeptidase
-	0.0414693	-0.0107079	ALDOC	Fructose-bisphosphate aldolase;Fructose-bisphosphate aldolase C (Fragment);Fructose-bisphosphate aldolase C (Fragment);Fructose-bisphosphate aldolase C (Fragment);Fructose-bisphosphate aldolase C
-	0.0718245	-0.00978254	TUBA1B	Tubulin alpha-1B chain
-	0.0314359	-0.00974935	PSME2	Proteasome activator complex subunit 2
-	0.0383235	-0.00944724	TLN1	Talin-1
-	0.0112449	-0.00899037	IGHV3-43	Immunoglobulin heavy variable 3-43
-	0.0277013	-0.00877112	DERA	Deoxyribose-phosphate aldolase
-	0.0466421	-0.00799665	SERPINB5	Serpin B5
-	0.0256976	-0.00791162	TYMP	Thymidine phosphorylase
-	0.0170786	-0.00756088	C5	Complement C5
-	0.0189357	-0.00746005	NT5C	5'(3')-deoxyribonucleotidase, cytosolic type
-	0.0425387	-0.00692144	HSPA1B;HSPA1A;HSPA1B	Heat shock 70 kDa protein 1B;Heat shock 70 kDa protein 1A;Heat shock 70 kDa protein 1B
-	0.0180857	-0.00631109	PSMC2	26S proteasome regulatory subunit 7
-	0.0149958	-0.0056657	UBE2L3	Ubiquitin-conjugating enzyme E2 L3;Isoform 2 of Ubiquitin-conjugating enzyme E2 L3;Isoform 3 of Ubiquitin-conjugating enzyme E2 L3
-	0.016354	-0.00544408	TWF1	Twinfilin-1
-	0.00950336	-0.00435629	RCN1	Reticulocalbin-1
-	0.0071308	-0.00316938	NQO1	NAD(P)H dehydrogenase [quinone] 1;NAD(P)H dehydrogenase [quinone] 1;Isoform 2 of NAD(P)H dehydrogenase [quinone] 1;Isoform 3 of NAD(P)H dehydrogenase [quinone] 1
-	0.00846192	-0.00287035	NT5C2	Cytosolic purine 5'-nucleotidase
-	0.00501016	-0.00148177	ADK	Adenosine kinase;Isoform 2 of Adenosine kinase;Isoform 3 of Adenosine kinase
-	0.00127493	-0.000327449	RAC1	Ras-related C3 botulinum toxin substrate 1;Isoform B of Ras-related C3 botulinum toxin substrate 1
-	0.00171415	-0.000282703	GDI2	Rab GDP dissociation inhibitor beta
-	0.000261483	-6.50644e-05	GPD1L	Glycerol-3-phosphate dehydrogenase 1-like protein
-	0.00119106	0.000211723	RAN	GTP-binding nuclear protein Ran
-	0.00613033	0.000912428	ACTN1	Alpha-actinin-1;Isoform 2 of Alpha-actinin-1;Isoform 3 of Alpha-actinin-1
-	0.00579351	0.00123963	ST13	Hsc70-interacting protein
-	0.00580155	0.00170654	EFEMP1	EGF-containing fibulin-like extracellular matrix protein 1;Isoform 2 of EGF-containing fibulin-like extracellular matrix protein 1;Isoform 3 of EGF-containing fibulin-like extracellular matrix protein 1;Isoform 4 of EGF-containing fibulin-like extracellular matrix protein 1
-	0.00434075	0.00196935	CTSS	Cathepsin S
-	0.00453592	0.00274683	H1-4	Histone H1.4
-	0.00796168	0.00279377	PSMB4	Proteasome subunit beta type-4
-	0.0128613	0.00331978	BDH2	3-hydroxybutyrate dehydrogenase type 2
-	0.00919698	0.00362597	RAD23B	UV excision repair protein RAD23 homolog B
-	0.00710879	0.00377521	IGLV3-10	Immunoglobulin lambda variable 3-10
-	0.02476	0.00428385	GMDS	GDP-mannose 4,6 dehydratase;Isoform 2 of GDP-mannose 4,6 dehydratase
-	0.020813	0.00431522	ARL3	ADP-ribosylation factor-like protein 3
-	0.0133491	0.00441082	TP53I3	Quinone oxidoreductase PIG3
-	0.0163713	0.00477069	PSMD12	26S proteasome non-ATPase regulatory subunit 12;Isoform 2 of 26S proteasome non-ATPase regulatory subunit 12
-	0.0151381	0.00609136	SH3GL1	Endophilin-A2
-	0.0214508	0.00609278	PPP1CB	Serine/threonine-protein phosphatase PP1-beta catalytic subunit
-	0.0262999	0.00637292	CTTN	Src substrate cortactin
-	0.0293359	0.00665604	EML2	Echinoderm microtubule-associated protein-like 2;Isoform 2 of Echinoderm microtubule-associated protein-like 2;Isoform 3 of Echinoderm microtubule-associated protein-like 2
-	0.0204854	0.00755534	hCG_2043426;DDX19B;DDX19A;DDX19A;DDX19B;DDX19B;DDX19B	HCG2043426, isoform CRA_b;ATP-dependent RNA helicase DDX19B;ATP-dependent RNA helicase DDX19A;ATP-dependent RNA helicase DDX19A;ATP-dependent RNA helicase DDX19B;Isoform 2 of ATP-dependent RNA helicase DDX19B;Isoform 4 of ATP-dependent RNA helicase DDX19B
-	0.0179441	0.0076559	CEACAM7	Carcinoembryonic antigen-related cell adhesion molecule 7
-	0.0285319	0.0078188	ACTC1;ACTA1	Actin, alpha cardiac muscle 1;Actin, alpha skeletal muscle
-	0.0212938	0.00818231	KLK11	Kallikrein-11;Isoform 1 of Kallikrein-11;Isoform 3 of Kallikrein-11;Isoform 4 of Kallikrein-11
-	0.015925	0.00821073	KRT14	Keratin, type I cytoskeletal 14
-	0.0211858	0.00862406	HLA-C	HLA class I histocompatibility antigen, C alpha chain;HLA class I histocompatibility antigen, C alpha chain;HLA class I histocompatibility antigen, C alpha chain;HLA class I histocompatibility antigen, C alpha chain
-	0.0304306	0.00956759	EPS8L2	Epidermal growth factor receptor kinase substrate 8-like protein 2;Isoform 3 of Epidermal growth factor receptor kinase substrate 8-like protein 2
-	0.0348423	0.0103467	C11orf54	Ester hydrolase C11orf54;Ester hydrolase C11orf54;Isoform 2 of Ester hydrolase C11orf54
-	0.0489577	0.0108182	FBP1	Fructose-1,6-bisphosphatase 1
-	0.0329916	0.0111971	GOT1	Aspartate aminotransferase, cytoplasmic;Isoform 2 of Aspartate aminotransferase, cytoplasmic
-	0.0698895	0.0118844	RNH1	Ribonuclease inhibitor
-	0.0470099	0.0127417	NARS1	Asparagine--tRNA ligase, cytoplasmic
-	0.044101	0.0128394	FNTA	Protein farnesyltransferase/geranylgeranyltransferase type-1 subunit alpha
-	0.0732429	0.0130627	PPP2R1A	Serine/threonine-protein phosphatase 2A 65 kDa regulatory subunit A alpha isoform
-	0.0536253	0.0134384	BLVRA	Biliverdin reductase A
-	0.0385525	0.0142977	PGM3	Phosphoacetylglucosamine mutase;Phosphoacetylglucosamine mutase;Phosphoacetylglucosamine mutase;Isoform 2 of Phosphoacetylglucosamine mutase
-	0.0425077	0.0144457	EEF1B2	Elongation factor 1-beta
-	0.0617259	0.014566	PYGB	Glycogen phosphorylase, brain form
-	0.096423	0.0152266	MDH1	Malate dehydrogenase, cytoplasmic;Isoform 3 of Malate dehydrogenase, cytoplasmic
-	0.055161	0.0157481	OLA1	Obg-like ATPase 1
-	0.0672579	0.0157929	MAPK1	Mitogen-activated protein kinase 1
-	0.0470528	0.0160492	MIF	Macrophage migration inhibitory factor
-	0.0497115	0.0161543	CLEC3B	Tetranectin
-	0.0325906	0.0166222	DAG1	Dystroglycan
-	0.0707053	0.0172543	SFN	14-3-3 protein sigma;Isoform 2 of 14-3-3 protein sigma
-	0.0582224	0.0183881	APRT	Adenine phosphoribosyltransferase;Isoform 2 of Adenine phosphoribosyltransferase
-	0.0587353	0.0184819	PPCS	Phosphopantothenate--cysteine ligase
-	0.0486916	0.0186726	SCRN1	Secernin-1;Isoform 2 of Secernin-1
-	0.054383	0.0191543	PSMA4	Proteasome subunit alpha type (Fragment);Proteasome subunit alpha type (Fragment);Proteasome subunit alpha type-4
-	0.103448	0.0195149	PCBP2	Poly(rC)-binding protein 2;Poly(rC)-binding protein 2 (Fragment);Poly(rC)-binding protein 2;Isoform 2 of Poly(rC)-binding protein 2;Isoform 3 of Poly(rC)-binding protein 2;Isoform 4 of Poly(rC)-binding protein 2;Isoform 5 of Poly(rC)-binding protein 2;Isoform 6 of Poly(rC)-binding protein 2;Isoform 7 of Poly(rC)-binding protein 2;Isoform 8 of Poly(rC)-binding protein 2
-	0.0441426	0.0196096	APMAP	Adipocyte plasma membrane-associated protein (Fragment);Adipocyte plasma membrane-associated protein;Isoform 2 of Adipocyte plasma membrane-associated protein
-	0.0613975	0.0196145	CRIP2	Cysteine-rich protein 2
-	0.0826199	0.0198638	MTAP	S-methyl-5'-thioadenosine phosphorylase
-	0.0932325	0.0200596	PDCD6IP	Programmed cell death 6-interacting protein
-	0.077861	0.0206577	NUDT5	ADP-sugar pyrophosphatase
-	0.0705501	0.0209812	EIF3CL;EIF3C;EIF3C	Eukaryotic translation initiation factor 3 subunit C-like protein;Eukaryotic translation initiation factor 3 subunit C;Isoform 2 of Eukaryotic translation initiation factor 3 subunit C
-	0.0982614	0.0213343	CCT2	T-complex protein 1 subunit beta
-	0.0833741	0.0219974	SEPTIN2	Septin-2;Septin-2;Isoform 2 of Septin-2;Isoform 3 of Septin-2
-	0.117737	0.0228762	CNDP2	Cytosolic non-specific dipeptidase
-	0.0909477	0.0229498	GDI1	Rab GDP dissociation inhibitor alpha
-	0.0688123	0.0230328	SOD3	Extracellular superoxide dismutase [Cu-Zn]
-	0.0777937	0.024416	NDRG2	Protein NDRG2;Isoform 2 of Protein NDRG2
-	0.17299	0.0244164	EZR	Ezrin
-	0.0930673	0.0251017	ADSS2	Adenylosuccinate synthetase isozyme 2
-	0.119605	0.0253636	PYGL	Glycogen phosphorylase, liver form;Isoform 2 of Glycogen phosphorylase, liver form
-	0.0864918	0.0256847	RAB2A	Ras-related protein Rab-2A
-	0.127334	0.025946	RPS3	40S ribosomal protein S3
-	0.0594598	0.0260056	RPS4X	40S ribosomal protein S4, X isoform
-	0.115605	0.0263736	CRYAB	Alpha-crystallin B chain
-	0.168925	0.0265057	CCT8	T-complex protein 1 subunit theta
-	0.0742015	0.0265647	COASY	Bifunctional coenzyme A synthase;Isoform 2 of Bifunctional coenzyme A synthase
-	0.105421	0.0265906	PPP1R7	Protein phosphatase 1 regulatory subunit 7
-	0.103022	0.0266796	ANXA5	Annexin A5
-	0.0978402	0.0267239	EEF1D	Elongation factor 1-delta (Fragment);Elongation factor 1-delta
-	0.0791569	0.0268087	CASP1	Caspase 1, apoptosis-related cysteine peptidase (Interleukin 1, beta, convertase), isoform CRA_c;Caspase-1;Isoform Beta of Caspase-1
-	0.124031	0.0271396	MTHFD1	C-1-tetrahydrofolate synthase, cytoplasmic
-	0.105528	0.0276857	RAB11B	Ras-related protein Rab-11B
-	0.0812783	0.0277109	RPS3A	40S ribosomal protein S3a
-	0.0303477	0.0283019	IGHV2-70D;IGHV2-70	Immunoglobulin heavy variable 2-70D;Immunoglobulin heavy variable 2-70 (Fragment)
-	0.0341859	0.0285043	MPO	Myeloperoxidase;Isoform H14 of Myeloperoxidase;Isoform H7 of Myeloperoxidase
-	0.109573	0.0291871	LAP3	Cytosol aminopeptidase;Isoform 2 of Cytosol aminopeptidase
-	0.0476545	0.0292084	IGKV6D-21	Immunoglobulin kappa variable 6D-21
-	0.17709	0.0298653	ASS1	Argininosuccinate synthase
-	0.14753	0.0299538	PREP	Prolyl endopeptidase
-	0.187274	0.0299865	GSTP1	Glutathione S-transferase P
-	0.11858	0.0311188	PGLS	6-phosphogluconolactonase
-	0.19591	0.0313484	PSMA7	Proteasome subunit alpha type-7
-	0.0706529	0.0327635	RBP4	Retinol-binding protein 4;Retinol-binding protein
-	0.0792248	0.0331264	IGHG2	Immunoglobulin heavy constant gamma 2 (Fragment);Immunoglobulin heavy constant gamma 2
-	0.132107	0.034135	IMPA1	Inositol monophosphatase 1;Isoform 3 of Inositol monophosphatase 1
-	0.210388	0.0345275	HSPB1	Heat shock protein beta-1
-	0.157778	0.0355223		cDNA FLJ55673, highly similar to Complement factor B
-	0.120967	0.0356945	CCDC6	Coiled-coil domain-containing protein 6
-	0.120159	0.0371956	CAB39L	Calcium-binding protein 39-like (Fragment);Calcium-binding protein 39-like
-	0.347018	0.0373317	EEF1A1;EEF1A1P5	Elongation factor 1-alpha 1;Putative elongation factor 1-alpha-like 3
-	0.154661	0.0388864	BLVRB	Flavin reductase (NADPH)
-	0.126653	0.0391002	ARPC5	Actin-related protein 2/3 complex subunit 5
-	0.0633059	0.0395002	IGHV2-26	Immunoglobulin heavy variable 2-26
-	0.170506	0.0395562	PDCD4	Programmed cell death protein 4;Isoform 2 of Programmed cell death protein 4
-	0.141572	0.039638	RPS2	40S ribosomal protein S2
-	0.140366	0.0396689	PABPC1	Polyadenylate-binding protein;Polyadenylate-binding protein 1;Isoform 2 of Polyadenylate-binding protein 1
-	0.119881	0.0397105	RPL14	60S ribosomal protein L14
-	0.110945	0.0401124	MCTS1	Malignant T-cell-amplified sequence 1;Isoform 3 of Malignant T-cell-amplified sequence 1
-	0.226629	0.0404336	NIT2	Omega-amidase NIT2
-	0.0478557	0.0412289	PRTN3	Myeloblastin
-	0.099664	0.0418367	CUL5	Cullin-5
-	0.20073	0.0428347	DBNL	Drebrin-like protein;Isoform 2 of Drebrin-like protein;Isoform 3 of Drebrin-like protein
-	0.152112	0.0429517	ATP6V1G1	V-type proton ATPase subunit G 1
-	0.169111	0.0430293	SORD	Sorbitol dehydrogenase
-	0.381552	0.0449853	YWHAZ	14-3-3 protein zeta/delta
-	0.169488	0.0470822	RPSA	40S ribosomal protein SA;40S ribosomal protein SA (Fragment);40S ribosomal protein SA
-	0.205564	0.047136	ATP6V1E1	V-type proton ATPase subunit E 1
-	0.127786	0.0473134	RPS14	40S ribosomal protein S14 (Fragment);40S ribosomal protein S14
-	0.255585	0.0473811	PSMB1	Proteasome subunit beta type-1
-	0.261178	0.047802	GSS	Glutathione synthetase
-	0.273843	0.0478275	CCT3	T-complex protein 1 subunit gamma
-	0.24382	0.048155	PSMA3	Proteasome subunit alpha type-3;Isoform 2 of Proteasome subunit alpha type-3
-	0.169265	0.0488003	TUBA1C	Tubulin alpha chain;Tubulin alpha-1C chain
-	0.29129	0.0492125	ADH5	Alcohol dehydrogenase class-3
-	0.204935	0.0497105	PSMD5	26S proteasome non-ATPase regulatory subunit 5;Isoform 2 of 26S proteasome non-ATPase regulatory subunit 5
-	0.160066	0.0498109	AP1G1	AP-1 complex subunit gamma-1;Isoform 2 of AP-1 complex subunit gamma-1
-	0.165206	0.0504662	CDC37	Hsp90 co-chaperone Cdc37
-	0.316212	0.0505551	PSMA5	Proteasome subunit alpha type-5
-	0.143089	0.0506124	CA13	Carbonic anhydrase 13
-	0.229962	0.0506549	GNPDA1	Glucosamine-6-phosphate isomerase 1
-	0.237277	0.0507794	PLS1	Plastin-1
-	0.238942	0.050879	PITPNA	Phosphatidylinositol transfer protein alpha isoform
-	0.190547	0.0509973	NDRG1	Protein NDRG1
-	0.156753	0.0525288	CALML3	Calmodulin-like protein 3
-	0.241322	0.0528345	VPS4B	Vacuolar protein sorting-associated protein 4B
-	0.608826	0.0530397	ACTN4	Alpha-actinin-4
-	0.198893	0.0530775	PPP2R2A	Serine/threonine-protein phosphatase 2A 55 kDa regulatory subunit B alpha isoform
-	0.287024	0.0538349	HEBP2	Heme-binding protein 2
-	0.166175	0.0540875	RPS19	40S ribosomal protein S19
-	0.150313	0.0542216	RPS25	40S ribosomal protein S25
-	0.178641	0.0548241	SULT2B1	Sulfotransferase 2B1;Isoform 2 of Sulfotransferase 2B1
-	0.222864	0.0553175	HARS	Histidine--tRNA ligase, cytoplasmic;Isoform 4 of Histidine--tRNA ligase, cytoplasmic
-	0.254006	0.0559445	AP1M2	AP-1 complex subunit mu-2
-	0.141884	0.056491	CALR	Calreticulin
-	0.241258	0.056735	PHGDH	D-3-phosphoglycerate dehydrogenase
-	0.210861	0.0574683	KIF21A	Kinesin-like protein KIF21A;Isoform 2 of Kinesin-like protein KIF21A;Isoform 4 of Kinesin-like protein KIF21A;Isoform 5 of Kinesin-like protein KIF21A;Isoform 6 of Kinesin-like protein KIF21A
-	0.418064	0.0576024	USP5	Ubiquitin carboxyl-terminal hydrolase 5;Isoform Short of Ubiquitin carboxyl-terminal hydrolase 5
-	0.25321	0.0580827	ALDH7A1	Isoform 2 of Alpha-aminoadipic semialdehyde dehydrogenase
-	0.250726	0.0581527	TSTA3	GDP-L-fucose synthase
-	0.204022	0.0592696	VPS4A	Vacuolar protein sorting-associated protein 4A
-	0.256516	0.0595023	VCL	Vinculin;Isoform 1 of Vinculin
-	0.186642	0.0598606	ASNA1	ATPase ASNA1
-	0.433906	0.060425	DSTN	Destrin
-	0.353914	0.060496	ANXA3	Annexin A3
-	0.12001	0.0606796	GBP1	Guanylate-binding protein 1
-	0.150094	0.0617984	S100A8	Protein S100-A8
-	0.197576	0.0631875	GC	Vitamin D-binding protein;Vitamin D-binding protein;Isoform 3 of Vitamin D-binding protein
-	0.247332	0.0635377	DNAJB1	DnaJ homolog subfamily B member 1
-	0.126438	0.0649375	KRT2	Keratin, type II cytoskeletal 2 epidermal
-	0.23741	0.0654597	CTSD	Cathepsin D
-	0.221953	0.0667206	UPK3BL1;UPK3BL2	Uroplakin-3b-like protein 1;Uroplakin-3b-like protein 2
-	0.358387	0.0679953	CCT4	T-complex protein 1 subunit delta
-	0.236856	0.0689216	UCHL3	Ubiquitin carboxyl-terminal hydrolase;Ubiquitin carboxyl-terminal hydrolase isozyme L3;Ubiquitin carboxyl-terminal hydrolase isozyme L3 (Fragment)
-	0.218775	0.0706673	TRIP10	Cdc42-interacting protein 4;Isoform 2 of Cdc42-interacting protein 4
-	0.369989	0.0711858	AHCYL2	Adenosylhomocysteinase 3;Isoform 2 of Adenosylhomocysteinase 3
-	0.548905	0.0712866	HSPA8	Heat shock cognate 71 kDa protein
-	0.302536	0.0714904	BZW1	Basic leucine zipper and W2 domain-containing protein 1;Isoform 3 of Basic leucine zipper and W2 domain-containing protein 1;Isoform 4 of Basic leucine zipper and W2 domain-containing protein 1
-	0.456925	0.0726034	APEH	Acylamino-acid-releasing enzyme
-	0.347676	0.0726605	PMM2	Phosphomannomutase 2
-	0.340525	0.072854	SERPINF1	Pigment epithelium-derived factor
-	0.287711	0.0736575	NUTF2	Nuclear transport factor 2
-	0.313093	0.0749672	PPM1A	Protein phosphatase 1A;Isoform 3 of Protein phosphatase 1A
-	0.368525	0.0765005	SEPTIN9	Septin-9;Isoform 2 of Septin-9;Isoform 3 of Septin-9;Isoform 5 of Septin-9;Isoform 7 of Septin-9
-	0.348336	0.0774714	USP14	Ubiquitin carboxyl-terminal hydrolase 14;Isoform 2 of Ubiquitin carboxyl-terminal hydrolase 14
-	0.235936	0.0776246	BLMH	Bleomycin hydrolase (Fragment);Bleomycin hydrolase (Fragment);Bleomycin hydrolase (Fragment);Bleomycin hydrolase
-	0.338914	0.0783562	PDXK	Pyridoxal kinase
-	0.33145	0.0790829	FABP5	Fatty acid-binding protein 5
-	0.351862	0.0790886	VPS25	Vacuolar protein-sorting-associated protein 25
-	0.387052	0.0792944	PEPD	Xaa-Pro dipeptidase
-	0.114951	0.0805846	KRT74;KRT74;KRT73	Keratin, type II cytoskeletal 74;Keratin, type II cytoskeletal 74;Keratin, type II cytoskeletal 73
-	0.346894	0.0812123	ARPC1B	Actin-related protein 2/3 complex subunit 1B
-	0.333826	0.0814741	GPX4	Glutathione peroxidase;Glutathione peroxidase;Glutathione peroxidase (Fragment);Phospholipid hydroperoxide glutathione peroxidase;Isoform Cytoplasmic of Phospholipid hydroperoxide glutathione peroxidase
-	0.503531	0.083027	YWHAQ	14-3-3 protein theta
-	0.30206	0.0834897	COPG1	Coatomer subunit gamma-1
-	0.348552	0.0835417	CHMP4B	Charged multivesicular body protein 4b
-	0.751158	0.0840517	YWHAE	14-3-3 protein epsilon
-	0.634153	0.0842129	VCP	Transitional endoplasmic reticulum ATPase
-	0.307887	0.0842278	PA2G4	Proliferation-associated protein 2G4
-	0.79723	0.0845963	PKM	Pyruvate kinase PKM
-	0.400425	0.0854672	GGCT	Gamma-glutamylcyclotransferase
-	0.218727	0.0859941	H2BC12;H2BFS;HIST1H2BD;H2BC4;HIST2H2BF;HIST2H2BF;HIST1H2BH;H2BC15;H2BC14;H2BC13;H2BC15	Histone H2B type 1-K;Histone H2B type F-S;Histone H2B type 1-D;Histone H2B type 1-C/E/F/G/I;Histone H2B type 2-F;Isoform 2 of Histone H2B type 2-F;Histone H2B type 1-H;Histone H2B type 1-N;Histone H2B type 1-M;Histone H2B type 1-L;Histone H2B
-	0.312397	0.0866928	VTA1	Chromosome 6 open reading frame 55, isoform CRA_b;Vacuolar protein sorting-associated protein VTA1 homolog
-	0.209903	0.0872931	APOD	Apolipoprotein D (Fragment);Apolipoprotein D
-	0.384526	0.0873288	BROX	BRO1 domain-containing protein BROX
-	0.171953	0.0884965	OPRPN	Opiorphin prepropeptide
-	0.189276	0.0885851	MDH2	Malate dehydrogenase, mitochondrial
-	0.264756	0.0894396	JUP	Junction plakoglobin
-	0.252192	0.0896702	FKBP1A	Peptidyl-prolyl cis-trans isomerase FKBP1A
-	0.746936	0.0901153	PRDX1	Peroxiredoxin-1
-	0.478658	0.0915776	RAB7A	Ras-related protein Rab-7a
-	0.435101	0.0922209	YWHAG	14-3-3 protein gamma
-	0.199204	0.0922492	IGHV4-28	Immunoglobulin heavy variable 4-28
-	0.450639	0.0932695	TSN	Translin
-	0.321464	0.0933934	PSMC6	26S proteasome regulatory subunit 10B
-	0.306268	0.093566	KARS1	Lysine--tRNA ligase
-	0.392631	0.0940439	ARF4	ADP-ribosylation factor 4
-	0.604445	0.0942884	PGM1	Phosphoglucomutase-1
-	1.18489	0.094653	HSP90AA1	Heat shock protein HSP 90-alpha;Isoform 2 of Heat shock protein HSP 90-alpha
-	0.193061	0.0951553	DIAPH1	Protein diaphanous homolog 1
-	0.210423	0.0962322	KRT17	Keratin, type I cytoskeletal 17
-	0.359941	0.0963883	RPS8	40S ribosomal protein S8
-	0.856931	0.0977449	MYL12A;MYL12B;MYL12A	Myosin regulatory light chain 12A;Myosin regulatory light chain 12B;Myosin regulatory light chain 12A
-	0.862849	0.098147	TPI1	Triosephosphate isomerase;Isoform 2 of Triosephosphate isomerase
-	0.262456	0.0987218	SERPINB3	Serpin B3
-	0.408001	0.100856	PPP1CA	Serine/threonine-protein phosphatase PP1-alpha catalytic subunit
-	0.290341	0.103455	F11R	Junctional adhesion molecule A
-	0.611287	0.104228	KPNB1	Importin subunit beta-1
-	1.01243	0.105555	EEF2	Elongation factor 2
-	0.305124	0.105943	BNC2	Zinc finger protein basonuclin-2 (Fragment);Zinc finger protein basonuclin-2;Zinc finger protein basonuclin-2;Zinc finger protein basonuclin-2 (Fragment);Basonuclin 2 (Fragment);Zinc finger protein basonuclin-2;Isoform 2 of Zinc finger protein basonuclin-2
-	0.507036	0.106646	UBE2V2	Ubiquitin-conjugating enzyme E2 variant 2
-	1.08116	0.106691	CAPNS1	Calpain small subunit 1 (Fragment);Calpain small subunit 1;Calpain small subunit 1 (Fragment);Calpain small subunit 1
-	0.147813	0.107196	A2ML1	Alpha-2-macroglobulin-like protein 1
-	0.69756	0.107474	EEF1G	Elongation factor 1-gamma
-	0.562895	0.108158	EIF5	Eukaryotic translation initiation factor 5
-	0.371212	0.109911	AHNAK	Neuroblast differentiation-associated protein AHNAK
-	0.584999	0.109954	CAPS	Isoform 3 of Calcyphosin
-	0.503906	0.111018	NACA	Nascent polypeptide-associated complex subunit alpha, muscle-specific form;Isoform skNAC-2 of Nascent polypeptide-associated complex subunit alpha, muscle-specific form;Nascent polypeptide-associated complex subunit alpha;Nascent polypeptide-associated complex subunit alpha (Fragment);Nascent polypeptide-associated complex subunit alpha;Nascent polypeptide-associated complex subunit alpha
-	1.70472	0.111491	GSN	Gelsolin
-	0.616387	0.111707	TXNDC17	Thioredoxin domain-containing protein 17
-	0.772886	0.112059	MYL6	Myosin light polypeptide 6;Myosin light polypeptide 6;Myosin light polypeptide 6;Myosin light polypeptide 6;Myosin light polypeptide 6;Myosin light polypeptide 6;Isoform Smooth muscle of Myosin light polypeptide 6
-	0.207825	0.112903	IGHV3-13	Immunoglobulin heavy variable 3-13
-	0.495519	0.114153	PSMC1	26S proteasome regulatory subunit 4
-	0.412586	0.115744	SAR1A	GTP-binding protein SAR1a
-	0.458599	0.116538	ANXA8L1	Annexin A8-like protein 1
-	0.22439	0.117749	H4C1	Histone H4
-	0.587476	0.118415	QARS	Glutamine--tRNA ligase;Isoform 2 of Glutamine--tRNA ligase
-	0.746776	0.118901	CCT7	T-complex protein 1 subunit eta
-	0.591406	0.122517	ESD	S-formylglutathione hydrolase
-	0.446796	0.124289	VAT1	Synaptic vesicle membrane protein VAT-1 homolog
-	0.143313	0.125414	DEFA1;DEFA3	Neutrophil defensin 1;Neutrophil defensin 3
-	0.51849	0.128898	ACTR1A	Alpha-centractin
-	0.92177	0.129181	GRHPR	Glyoxylate reductase/hydroxypyruvate reductase
-	0.809885	0.129562	CLINT1	Clathrin interactor 1;Isoform 3 of Clathrin interactor 1
-	0.450837	0.131938	HMGB1	High mobility group protein B1
-	0.747094	0.132722	TXNL1	Thioredoxin-like protein 1
-	0.594209	0.134059	DGKA	Diacylglycerol kinase alpha
-	0.68982	0.134869	TAX1BP3	Tax1-binding protein 3
-	0.380994	0.135166	HNRNPA2B1	Heterogeneous nuclear ribonucleoproteins A2/B1
-	0.77742	0.138733	CORO1B	Coronin-1B
-	0.466175	0.139792	AK1	Adenylate kinase isoenzyme 1
-	0.712131	0.140853	GSPT1	Isoform 2 of Eukaryotic peptide chain release factor GTP-binding subunit ERF3A;Isoform 3 of Eukaryotic peptide chain release factor GTP-binding subunit ERF3A
-	0.965638	0.143115	NAPRT	Nicotinate phosphoribosyltransferase
-	0.40649	0.14321	TRIM25	E3 ubiquitin/ISG15 ligase TRIM25
-	0.787915	0.1435	UBE2N	Ubiquitin-conjugating enzyme E2 N
-	0.970701	0.145098	CPPED1	Serine/threonine-protein phosphatase CPPED1
-	0.456753	0.145315	DCXR	L-xylulose reductase (Fragment);L-xylulose reductase (Fragment);L-xylulose reductase
-	0.556879	0.145353	ACTG1	Actin, cytoplasmic 2
-	0.683015	0.14615	CASP3	Caspase-3
-	0.339338	0.146242	GLOD4	Glyoxalase domain-containing protein 4;Isoform 2 of Glyoxalase domain-containing protein 4
-	1.33067	0.147246	ATP6V1B2	V-type proton ATPase subunit B, brain isoform
-	0.244506	0.14841	CRIP1	Cysteine-rich protein 1
-	0.576567	0.148443	RPL7	60S ribosomal protein L7
-	1.2132	0.148642	PSMA1	Proteasome subunit alpha type-1;Isoform Long of Proteasome subunit alpha type-1
-	1.91384	0.148833	PRDX2	Peroxiredoxin-2
-	0.300878	0.149786	KPRP	Keratinocyte proline-rich protein
-	0.354409	0.150021	LRG1	Leucine-rich alpha-2-glycoprotein
-	0.855113	0.150351	TUBB4B	Tubulin beta-4B chain
-	2.37033	0.151669	ALDOA	Fructose-bisphosphate aldolase;Fructose-bisphosphate aldolase A
-	0.565611	0.155088	HNRNPA1	Heterogeneous nuclear ribonucleoprotein A1;Heterogeneous nuclear ribonucleoprotein A1;Isoform A1-A of Heterogeneous nuclear ribonucleoprotein A1;Isoform 2 of Heterogeneous nuclear ribonucleoprotein A1
-	0.334889	0.155699	IGHG3	Immunoglobulin heavy constant gamma 3 (Fragment);Immunoglobulin heavy constant gamma 3 (Fragment);Immunoglobulin heavy constant gamma 3
-	0.648014	0.156558	COPB1	Coatomer subunit beta
-	0.665533	0.15731	VPS35	Vacuolar protein sorting-associated protein 35
-	0.584855	0.158351	GYG1	Glycogenin-1;Isoform GN-1 of Glycogenin-1
-	1.19156	0.1592	SERPINB1	Leukocyte elastase inhibitor
-	0.677655	0.159545	ACP1	Low molecular weight phosphotyrosine protein phosphatase
-	1.01808	0.161549	YWHAB	14-3-3 protein beta/alpha
-	0.51681	0.163926	RBBP9	Serine hydrolase RBBP9;Isoform 2 of Serine hydrolase RBBP9
-	0.850011	0.165852	PPL	Periplakin
-	0.78236	0.166514	DDX39B	Spliceosome RNA helicase DDX39B;Isoform 2 of Spliceosome RNA helicase DDX39B
-	1.34642	0.167525	ALDH1A3	Aldehyde dehydrogenase family 1 member A3
-	0.50269	0.167825	TMSB4X	Thymosin beta-4
-	1.14455	0.169078	ARHGDIB	Rho GDP-dissociation inhibitor 2 (Fragment);Rho GDP-dissociation inhibitor 2
-	0.976975	0.170483	NAP1L4	Nucleosome assembly protein 1-like 4 (Fragment);Nucleosome assembly protein 1-like 4 (Fragment);Nucleosome assembly protein 1-like 4 (Fragment);Nucleosome assembly protein 1-like 4 (Fragment);Nucleosome assembly protein 1-like 4 (Fragment);Nucleosome assembly protein 1-like 4;Isoform 2 of Nucleosome assembly protein 1-like 4
-	0.720735	0.172678	GMPR2	GMP reductase;GMP reductase;GMP reductase;GMP reductase;GMP reductase;GMP reductase 2;Isoform 2 of GMP reductase 2
-	1.01675	0.174251	LXN	Latexin
-	0.739695	0.175572	RARS	Arginine--tRNA ligase, cytoplasmic
-	0.542711	0.17599	ITIH2	Inter-alpha-trypsin inhibitor heavy chain H2
-	0.565773	0.178238	CLIC6	Chloride intracellular channel protein 6;Isoform A of Chloride intracellular channel protein 6
-	0.532545	0.178814	PDIA3	Protein disulfide-isomerase A3
-	0.951727	0.181468	GALK1	Galactokinase;Isoform 2 of Galactokinase
-	1.34478	0.18277	ANXA2	Annexin A2
-	2.67501	0.183715	ACTB	Actin, cytoplasmic 1
-	1.2928	0.189318	MAPK3	Mitogen-activated protein kinase 3
-	1.43936	0.191595	TUBA4A	Tubulin alpha-4A chain;Isoform 2 of Tubulin alpha-4A chain
-	1.33312	0.192403	TES	Testin;Isoform 2 of Testin
-	1.27187	0.196987	ALDH1A1	Retinal dehydrogenase 1
-	0.856176	0.197791	SLC34A2	Sodium-dependent phosphate transport protein 2B;Isoform 2 of Sodium-dependent phosphate transport protein 2B
-	1.53166	0.198572	UBE2D3;UBE2D2;UBE2D3;UBE2D3;UBE2D2;UBE2D3;UBE2D3;UBE2D3;UBE2D3;UBE2D2;UBE2D2	Ubiquitin-conjugating enzyme E2 D3;Ubiquitin-conjugating enzyme E2 D2;Ubiquitin-conjugating enzyme E2 D3;Ubiquitin-conjugating enzyme E2 D3 (Fragment);Ubiquitin-conjugating enzyme E2 D2 (Fragment);Ubiquitin-conjugating enzyme E2 D3;Ubiquitin-conjugating enzyme E2 D3;Isoform 2 of Ubiquitin-conjugating enzyme E2 D3;Isoform 3 of Ubiquitin-conjugating enzyme E2 D3;Ubiquitin-conjugating enzyme E2 D2;I…
-	0.641315	0.19873	S100A9	Protein S100-A9
-	2.17296	0.198821	ENO1	Alpha-enolase
-	1.03652	0.204523	PTMA	Prothymosin alpha;Prothymosin alpha;Isoform 2 of Prothymosin alpha
-	0.58076	0.205091	KRT6A	Keratin, type II cytoskeletal 6A
-	1.09423	0.207685	ARHGAP1	Rho GTPase-activating protein 1
-	1.362	0.208915	EIF6	Eukaryotic translation initiation factor 6
-	0.420065	0.209667	KRT6B	Keratin, type II cytoskeletal 6B
-	1.32898	0.211217	CAPNS2	Calpain small subunit 2
-	0.538278	0.217617	LYPLA1	Acyl-protein thioesterase 1;Acyl-protein thioesterase 1;Isoform 2 of Acyl-protein thioesterase 1
-	1.08433	0.221458	TALDO1	Transaldolase
-	1.26009	0.222139	PGM2	Phosphoglucomutase-2
-	1.80011	0.228607	NAGK	N-acetyl-D-glucosamine kinase
-	1.23684	0.23018	SNX1	Sorting nexin-1
-	1.44004	0.231121	LANCL1	Glutathione S-transferase LANCL1
-	0.89696	0.231261	PSMB6	Proteasome subunit beta type-6
-	1.45075	0.231738	RAB1B	Ras-related protein Rab-1B
-	1.59343	0.232369	PPP3CA	Serine/threonine-protein phosphatase 2B catalytic subunit alpha isoform;Isoform 2 of Serine/threonine-protein phosphatase 2B catalytic subunit alpha isoform
-	2.63278	0.238319	CDC42	Cell division control protein 42 homolog
-	1.01104	0.239955	EHD1	EH domain-containing protein 1
-	1.24794	0.241538	CHMP3	Charged multivesicular body protein 3
-	0.618696	0.243067	KRT13	Keratin, type I cytoskeletal 13
-	0.600585	0.246958	KRT9	Keratin, type I cytoskeletal 9
-	1.6587	0.247656	LGALS3	Galectin-3
-	0.607367	0.24907	IGLV3-19	Immunoglobulin lambda variable 3-19
-	0.70088	0.249441	KRT1	Keratin, type II cytoskeletal 1
-	0.783617	0.257411	DSP	Desmoplakin
-	1.75753	0.259515	ANXA1	Annexin A1
-	1.6377	0.259679	RPL12	60S ribosomal protein L12
-	2.16709	0.260439	FDPS	Farnesyl pyrophosphate synthase;Isoform 2 of Farnesyl pyrophosphate synthase
-	0.801432	0.262909	KRT5	Keratin, type II cytoskeletal 5
-	2.19349	0.264633	GLUL	Glutamine synthetase
-	1.62773	0.265297	PFN2	Profilin;Profilin;Isoform IIb of Profilin-2
-	1.73955	0.270559	S100A11	Protein S100-A11
-	0.921785	0.275696	ARG1	Arginase-1;Isoform 2 of Arginase-1
-	1.0924	0.27593	APOA4	Apolipoprotein A-IV
-	1.09993	0.279689	SET	Protein SET;Protein SET;Isoform 2 of Protein SET;Isoform 3 of Protein SET;Isoform 4 of Protein SET
-	0.929521	0.280765	GSTA1	Glutathione S-transferase A1
-	1.63767	0.28207	RPL22;;RPL22;RPL22;RPL22;RPL22;RPL22	60S ribosomal protein L22 (Fragment);Uncharacterized protein;60S ribosomal protein L22 (Fragment);60S ribosomal protein L22 (Fragment);60S ribosomal protein L22 (Fragment);60S ribosomal protein L22;60S ribosomal protein L22
-	0.883648	0.287207	KRT16	Keratin, type I cytoskeletal 16
-	0.748776	0.29416	hCG_2039566;;H2AC4;H2AC11;H2AC7;HIST2H2AC;HIST2H2AA3;HIST3H2A;HIST1H2AC;HIST1H2AH;H2AC14;H2AFJ	Histone H2A;Histone H2A;Histone H2A type 1-B/E;Histone H2A type 1;Histone H2A type 1-D;Histone H2A type 2-C;Histone H2A type 2-A;Histone H2A type 3;Histone H2A type 1-C;Histone H2A type 1-H;Histone H2A type 1-J;Histone H2A.J
-	1.06782	0.309383	SERPINB12	Serpin B12;Isoform 2 of Serpin B12
-	1.02072	0.329353	CASP14	Caspase-14
-	0.937937	0.334068	MSN	Moesin
-	1.68868	0.342779	S100A6	Protein S100-A6;Protein S100 (Fragment)
-	0.92978	0.388233	PFAS	Phosphoribosylformylglycinamidine synthase
-	1.31916	0.415103	KRT10	Keratin, type I cytoskeletal 10
-	1.26169	0.432763	KRT77	Keratin, type II cytoskeletal 1b
-	1.02911	0.46312	H3-3A;H3-3A;H3-3B;H3-3B;H3-3B;H3C1;H3-3A;HIST3H3;HIST2H3A	Histone H3;Histone H3;Histone H3 (Fragment);Histone H3;Histone H3.3 (Fragment);Histone H3.1;Histone H3.3;Histone H3.1t;Histone H3.2
-	0.784006	0.507253	IGHV5-10-1	Immunoglobulin heavy variable 5-10-1
