# Supplementary material for: Identification and validation of a tear fluid-derived protein biomarker signature in patients with amyotrophic lateral sclerosis
Source: Acta Neuropathol Commun. 2025 Sep 2;13:187. doi: 10.1186/s40478-025-02109-6 (PMC12403336; doi:10.1186/s40478-025-02109-6)
Supplement: Supplementary file 3 — Supplementary Material 3 [file 40478_2025_2109_MOESM3_ESM.xlsx]

## Sheet: Tabelle1
GO Analysis	Assigned generic term	Pathway	Set size	ES	NES	p-value	Adjusted p-value	q-value	Rank	Leading_edge	Proteins	Geom_labels	N of proteins	Significance
BP	Chromosome organization	Chromosome organization	37	0.553982	2.18987	3.98233e+09	0.0149508	0.0147136	177	tags=49%, list=20%, signal=40%	H3-3A/HNRNPD/SET/ANXA1/CHMP3/MAPK3/ACTB/NAP1L4/HNRNPA1/HNRNPA2B1/HMGB1/CCT7/H4C1/KPNB1/HSP90AA1/H2BC12/CHMP4B/GPX4	18/37	18	*
	Immune system	Defense response	164	-0.478926	-1.49939	0.000210647	0.0345987	0.0340499	219	tags=39%, list=25%, signal=36%	FLNB/CTSC/IGHG1/KNG1/THBS1/ORM2/ANG/HPX/DNAJC3/FGB/C9/ATRN/RPL30/HSPG2/SERPING1/APOBEC3A/FGA/APOE/HRG/IGHA2/CD55/ORM1/DCD/IGKV3-20/ERAP1/SERPINA3/IGHV5-51/IGLC2/IGHV3-72/C4BPA/IGHV3-38/IGLL1/CLU/IGHV3-74/IGHA1/DMBT1/LCN2/CHID1/CST3/IGHV3-64/LGALS3BP/IGHV6-1/SLPI/CD44/IGHV3-35/IGKC/IGHV3-49/HTRA1/GRN/JCHAIN/IGHV4-34/IGHV3-64D/TIMP1/IGHV3-15/DPP4/LACRT/PLA2G2A/A2M/LTF/RNASET2/IGHV1OR15-1/IGHV3-7/CX…	64/164	64	*
		Immune response	174	-0.533427	-1.67338	3.50263e+07	0.000460245	0.000452945	250	tags=49%, list=29%, signal=44%	IGKV1-17/IGLL5/C3/AMBP/IGHV1-69/B2M/ST3GAL1/TF/DDX1/SWAP70/IGHV1-18/FLNB/IGKV3D-20/CTSC/IGHG1/THBS1/ANG/HPX/FGB/C9/RPL30/IGLV7-43/SERPING1/HPRT1/APOBEC3A/FGA/APOE/HRG/BAX/IGHA2/CD55/VTN/IGLV3-21/IGKV3-20/ERAP1/CTSL/IGHV5-51/IGLC2/IGHV3-72/C4BPA/IGHV3-38/AZGP1/IGLL1/CLU/IGLV9-49/IGHV3-74/IGKV1D-33/IGKV1-39/IGKV2-40/IGHA1/IGLV2-8/IGKV3D-11/DMBT1/CD59/LCN2/CHID1/IGHV3-64/IGKV3-7/IGHV6-1/IGKV1-27/SLP…	85/174	85	***
		Response to bacterium	89	-0.53702	-1.62899	0.000142824	0.0302415	0.0297618	251	tags=51%, list=29%, signal=40%	RHOA/IGLL5/C3/IGHV1-69/B2M/TF/IGHV1-18/APOB/IGHG1/ANG/FGB/RPL30/FGA/IGHA2/CD55/DCD/IGKV3-20/ERAP1/IGHV5-51/IGLC2/IGHV3-72/C4BPA/IGHV3-38/IGLL1/IGHV3-74/IGHA1/DMBT1/LCN2/IGHV3-64/IGHV6-1/SLPI/IGHV3-35/IGKC/IGHV3-49/GRN/JCHAIN/IGHV4-34/IGHV3-64D/IGHV3-15/LACRT/PLA2G2A/LTF/IGHV1OR15-1/IGHV3-7/HP	45/89	45	*
		Adaptive immune response based on somatic recombination of immune receptors built from immunoglobulin superfamily domains	50	-0.591022	-1.7013	0.000318725	0.0465339	0.0457958	249	tags=68%, list=29%, signal=51%	IGLL5/C3/IGHV1-69/B2M/SWAP70/IGHV1-18/CTSC/IGHG1/HPX/C9/SERPING1/HPRT1/IGHA2/CD55/IGHV5-51/IGLC2/IGHV3-72/C4BPA/IGHV3-38/AZGP1/IGLL1/CLU/IGHV3-74/IGHA1/IGHV3-64/IGHV6-1/IGHV3-35/IGKC/IGHV3-49/IGHV4-34/IGHV3-64D/IGHV3-15/IGHV1OR15-1/IGHV3-7	34/50	34	*
		Humoral immune response	67	-0.596	-1.76868	8.43487e+08	0.00491798	0.00483998	249	tags=64%, list=29%, signal=50%	IGLL5/C3/IGHV1-69/TF/IGHV1-18/IGHG1/ANG/HPX/FGB/C9/RPL30/SERPING1/FGA/HRG/IGHA2/CD55/IGKV3-20/IGHV5-51/IGLC2/IGHV3-72/C4BPA/IGHV3-38/IGLL1/CLU/IGHV3-74/IGHA1/DMBT1/CD59/IGHV3-64/IGHV6-1/SLPI/IGHV3-35/IGKC/IGHV3-49/PRSS3/JCHAIN/IGHV4-34/IGHV3-64D/IGHV3-15/A2M/LTF/IGHV1OR15-1/IGHV3-7	43/67	43	**
		Complement activation	43	-0.620748	-1.75438	0.00020481	0.0345987	0.0340499	147	tags=70%, list=17%, signal=61%	IGLL5/C3/IGHV1-69/IGHV1-18/IGHG1/C9/SERPING1/IGHA2/CD55/IGHV5-51/IGLC2/IGHV3-72/C4BPA/IGHV3-38/IGLL1/CLU/IGHV3-74/IGHA1/CD59/IGHV3-64/IGHV6-1/IGHV3-35/IGKC/IGHV3-49/IGHV4-34/IGHV3-64D/IGHV3-15/A2M/IGHV1OR15-1/IGHV3-7	30/43	30	*
		Defense response to bacterium	60	-0.621945	-1.82616	5.60678e+08	0.00491154	0.00483364	131	tags=55%, list=15%, signal=50%	ANG/FGB/RPL30/FGA/IGHA2/DCD/IGKV3-20/IGHV5-51/IGLC2/IGHV3-72/IGHV3-38/IGLL1/IGHV3-74/IGHA1/DMBT1/LCN2/IGHV3-64/IGHV6-1/SLPI/IGHV3-35/IGKC/IGHV3-49/GRN/JCHAIN/IGHV4-34/IGHV3-64D/IGHV3-15/LACRT/PLA2G2A/LTF/IGHV1OR15-1/IGHV3-7/HP	33/60	33	**
		Production of molecular mediator of immune response	43	-0.625716	-1.76842	0.0001332	0.0302415	0.0297618	121	tags=65%, list=14%, signal=59%	IGKV1-17/B2M/DDX1/SWAP70/IGKV3D-20/HPX/IGLV7-43/CD55/IGLV3-21/IGKV3-20/IGLV9-49/IGKV1D-33/IGKV1-39/IGKV2-40/IGLV2-8/IGKV3D-11/IGKV3-7/IGKV1-27/IGKV2D-24/IGLV1-47/IGKC/IGLV6-57/IGKV4-1/IGKV1-16/IGKV3D-15/IGKV2D-28/IGKV1-8/IGLV2-18	28/43	28	*
		Immune response regulating cell surface receptor signaling pathway	40	-0.6259	-1.75167	0.000239003	0.0369471	0.036361	150	tags=50%, list=17%, signal=43%	BAX/IGHA2/IGHV5-51/IGLC2/IGHV3-72/IGHV3-38/IGLL1/IGHV3-74/IGHA1/IGHV3-64/IGHV6-1/PIGR/IGHV3-35/IGKC/IGHV3-49/IGHV4-34/IGHV3-64D/IGHV3-15/IGHV1OR15-1/IGHV3-7	20/40	20	*
		Humoral immune response mediated by circulating immunoglobulin	40	-0.633665	-1.7734	0.000184684	0.0345987	0.0340499	249	tags=72%, list=29%, signal=54%	IGLL5/C3/IGHV1-69/IGHV1-18/IGHG1/HPX/C9/SERPING1/IGHA2/CD55/IGHV5-51/IGLC2/IGHV3-72/C4BPA/IGHV3-38/IGLL1/CLU/IGHV3-74/IGHA1/IGHV3-64/IGHV6-1/IGHV3-35/IGKC/IGHV3-49/IGHV4-34/IGHV3-64D/IGHV3-15/IGHV1OR15-1/IGHV3-7	29/40	29	*
		B cell mediated immunity	43	-0.635944	-1.79733	7.35686e+08	0.0241673	0.023784	249	tags=72%, list=29%, signal=54%	IGLL5/C3/IGHV1-69/B2M/SWAP70/IGHV1-18/IGHG1/HPX/C9/SERPING1/IGHA2/CD55/IGHV5-51/IGLC2/IGHV3-72/C4BPA/IGHV3-38/IGLL1/CLU/IGHV3-74/IGHA1/IGHV3-64/IGHV6-1/IGHV3-35/IGKC/IGHV3-49/IGHV4-34/IGHV3-64D/IGHV3-15/IGHV1OR15-1/IGHV3-7	31/43	31	*
		Adaptive immune response	90	-0.642077	-1.94953	143526	3.77185e+08	3.71202e+08	250	tags=68%, list=29%, signal=54%	IGKV1-17/IGLL5/C3/IGHV1-69/B2M/SWAP70/IGHV1-18/IGKV3D-20/CTSC/IGHG1/HPX/FGB/C9/IGLV7-43/SERPING1/HPRT1/FGA/IGHA2/CD55/IGLV3-21/IGKV3-20/ERAP1/CTSL/IGHV5-51/IGLC2/IGHV3-72/C4BPA/IGHV3-38/AZGP1/IGLL1/CLU/IGLV9-49/IGHV3-74/IGKV1D-33/IGKV1-39/IGKV2-40/IGHA1/IGLV2-8/IGKV3D-11/IGHV3-64/IGKV3-7/IGHV6-1/IGKV1-27/IGKV2D-24/IGLV1-47/IGHV3-35/IGKC/IGHV3-49/IGLV6-57/IGKV4-1/IGKV1-16/JCHAIN/IGHV4-34/IGHV3-64D…	61/90	61	***
		Regulation of B cell activation	34	-0.654215	-1.7907	0.000136526	0.0302415	0.0297618	120	tags=56%, list=14%, signal=50%	IGHA2/SFRP1/IGHV5-51/IGLC2/IGHV3-72/IGHV3-38/IGLL1/IGHV3-74/IGHA1/IGHV3-64/IGHV6-1/IGHV3-35/IGKC/IGHV3-49/IGHV4-34/IGHV3-64D/IGHV3-15/IGHV1OR15-1/IGHV3-7	19/34	19	*
		B cell receptor signaling pathway	33	-0.659452	-1.79646	0.000149596	0.0302415	0.0297618	150	tags=58%, list=17%, signal=50%	BAX/IGHA2/IGHV5-51/IGLC2/IGHV3-72/IGHV3-38/IGLL1/IGHV3-74/IGHA1/IGHV3-64/IGHV6-1/IGHV3-35/IGKC/IGHV3-49/IGHV4-34/IGHV3-64D/IGHV3-15/IGHV1OR15-1/IGHV3-7	19/33	19	*
		Positive regulation of B cell activation	32	-0.67186	-1.8213	0.000107352	0.0302415	0.0297618	108	tags=53%, list=12%, signal=48%	IGHV5-51/IGLC2/IGHV3-72/IGHV3-38/IGLL1/IGHV3-74/IGHA1/IGHV3-64/IGHV6-1/IGHV3-35/IGKC/IGHV3-49/IGHV4-34/IGHV3-64D/IGHV3-15/IGHV1OR15-1/IGHV3-7	17/32	17	*
		Immunoglobulin production	37	-0.687874	-1.90494	9.3569e+08	0.00491798	0.00483998	121	tags=54%, list=14%, signal=49%	IGLV3-21/IGKV3-20/IGLV9-49/IGKV1D-33/IGKV1-39/IGKV2-40/IGLV2-8/IGKV3D-11/IGKV3-7/IGKV1-27/IGKV2D-24/IGLV1-47/IGKC/IGLV6-57/IGKV4-1/IGKV1-16/IGKV3D-15/IGKV2D-28/IGKV1-8/IGLV2-18	20/37	20	**
		Phagocytosis recognition	33	-0.694955	-1.89318	1.99736e+09	0.00874842	0.00860965	108	tags=58%, list=12%, signal=52%	IGHV5-51/IGLC2/IGHV3-72/C4BPA/IGHV3-38/IGLL1/IGHV3-74/IGHA1/IGHV3-64/IGHV6-1/IGHV3-35/IGKC/IGHV3-49/IGHV4-34/IGHV3-64D/IGHV3-15/MFGE8/IGHV1OR15-1/IGHV3-7	19/33	19	**
CC	Cytoskeleton	Keratin filament	16	0.660482	2.07621	0.00108194	0.0279641	0.0263696	58	tags=56%, list=7%, signal=53%	KRT77/KRT10/CASP14/KRT5/KRT1/KRT9/KRT13/KRT6B/KRT6A	01,09,2016	9	*
		Intermediate filament	22	0.652564	2.25308	0.000113679	0.00477453	0.0045023	82	tags=59%, list=9%, signal=55%	KRT77/KRT10/CASP14/KRT16/KRT5/DSP/KRT1/KRT9/KRT13/KRT6B/EIF6/KRT6A/PPL	13/22	13	**
		Intermediate filament cytoskeleton	25	0.585557	2.09398	0.000156014	0.00582453	0.00549243	82	tags=52%, list=9%, signal=48%	KRT77/KRT10/CASP14/KRT16/KRT5/DSP/KRT1/KRT9/KRT13/KRT6B/EIF6/KRT6A/PPL	13/25	13	**
		Polymeric cytoskeletal fiber	74	0.403076	1.82839	5.64992e+09	0.00271196	0.00255733	111	tags=30%, list=13%, signal=28%	KRT77/KRT10/CASP14/KRT16/KRT5/ANXA1/DSP/KRT1/KRT9/KRT13/CHMP3/KRT6B/EIF6/KRT6A/TUBA4A/ACTB/PPL/TUBB4B/ACTG1/DCXR/AK1/CORO1B	22/74	22	**
	Supramolecular complex	Supramolecular polymer	91	0.396496	1.87131	1.10275e+09	0.000923375	0.000870726	111	tags=29%, list=13%, signal=28%	FBP2/KRT77/KRT10/CASP14/KRT16/KRT5/ANXA1/DSP/KRT1/KRT9/KRT13/CHMP3/PPP3CA/KRT6B/EIF6/KRT6A/ENO1/TUBA4A/ACTB/PPL/ALDOA/TUBB4B/ACTG1/DCXR/AK1/CORO1B	26/91	26	***
		Supramolecular complex	114	0.374774	1.83125	1.86825e+08	0.000313866	0.00029597	111	tags=26%, list=13%, signal=26%	FBP2/KRT77/KRT10/SUMO3/CASP14/KRT16/KRT5/ANXA1/DSP/KRT1/KRT9/KRT13/CHMP3/CDC42/PPP3CA/KRT6B/EIF6/KRT6A/ENO1/TUBA4A/ACTB/PPL/SERPINB1/ALDOA/TUBB4B/ACTG1/DCXR/TRIM25/AK1/CORO1B	30/114	30	***
	Endoplasmatic reticulum	Endoplasmic reticulum	131	-0.468404	-1.45234	0.00207463	0.0464716	0.0438219	260	tags=44%, list=30%, signal=37%	PTGDS/SERPINA1/RHOA/C3/B2M/AGR2/TF/STOM/RPLP0/CTSC/APOB/P4HB/PPIB/KNG1/THBS1/RHOC/SDF4/MELTF/DNAJC3/FGB/NUCB1/SERPING1/SERPIND1/FGA/SDCBP/FOLR1/RPS27A/PROM1/PRKCSH/APOE/BAX/VTN/FGG/GANAB/ADGRG6/ERAP1/QSOX1/GOLM1/IGLL1/CLU/HSPA13/CALU/CD59/CST3/SPARCL1/NUCB2/CP/GRN/PLOD1/SERPINC1/HYOU1/TIMP1/PLA2G2A/AQP5/SIL1/RNASET2/MFGE8/MSLN	58/131	58	*
		Endoplasmic reticulum lumen	53	-0.591539	-1.71197	0.000222018	0.0074598	0.00703446	256	tags=66%, list=29%, signal=50%	SERPINA1/C3/B2M/TF/CTSC/APOB/P4HB/PPIB/KNG1/THBS1/MELTF/DNAJC3/NUCB1/SERPING1/SERPIND1/FGA/PRKCSH/APOE/FGG/GANAB/ERAP1/QSOX1/GOLM1/CLU/CALU/CST3/SPARCL1/CP/SERPINC1/HYOU1/TIMP1/SIL1/RNASET2/MFGE8/MSLN	35/53	35	**
	Blood microparticle	Blood microparticle	76	-0.545576	-1.63484	0.000308782	0.00943188	0.0088941	253	tags=61%, list=29%, signal=47%	PON1/IGKV1-17/C3/AMBP/PLG/TF/STOM/PFN1/IGHG1/KNG1/AFM/ORM2/HPX/FGB/C9/SERPING1/FGA/SDCBP/APOE/HRG/IGHA2/ORM1/VTN/FGG/IGLV3-21/IGKV3-20/SERPINA3/IGLC2/C4BPA/CLU/IGKV1D-33/IGKV1-39/IGKV2-40/IGHA1/IGKV3D-11/LGALS3BP/CP/IGLV1-47/IGKC/IGKV4-1/JCHAIN/SERPINC1/A2M/IGKV2D-28/IGHV3-7/HP	46/76	46	**
	Cell surface	Cell surface	94	-0.563705	-1.71585	7.84863e+08	0.000879046	0.000828925	249	tags=59%, list=29%, signal=47%	IGLL5/C3/AMBP/IGHV1-69/B2M/PLG/TF/IGHV1-18/P4HB/IGHG1/THBS1/APOH/MELTF/FGB/FGA/FOLR1/PROM1/HRG/IGHA2/CD55/ADGRV1/CTSB/FGG/ANPEP/ADGRG6/SFRP1/IGHV5-51/IGLC2/IGHV3-72/IGHV3-38/AZGP1/IGLL1/CLU/IGHV3-74/IGHA1/CD59/IGHV3-64/IGHV6-1/CD44/KRT4/IGHV3-35/PAM/IGKC/IGHV3-49/IGHV4-34/IGHV3-64D/IGHV3-15/DPP4/FOLH1/CD9/LTF/MFGE8/IGHV1OR15-1/IGHV3-7/MSLN	55/94	55	***
		External side of plasma membrane	57	-0.60713	-1.77047	4.74844e+09	0.00265913	0.00250751	249	tags=65%, list=29%, signal=50%	IGLL5/IGHV1-69/B2M/PLG/TF/IGHV1-18/P4HB/IGHG1/THBS1/FGB/FGA/FOLR1/IGHA2/CTSB/FGG/ANPEP/IGHV5-51/IGLC2/IGHV3-72/IGHV3-38/AZGP1/IGLL1/IGHV3-74/IGHA1/CD59/IGHV3-64/IGHV6-1/IGHV3-35/IGKC/IGHV3-49/IGHV4-34/IGHV3-64D/IGHV3-15/CD9/MFGE8/IGHV1OR15-1/IGHV3-7	37/57	37	**
		Intrinsic component of plasma membrane	26	-0.639042	-1.67676	0.00150642	0.0361541	0.0340926	197	tags=62%, list=23%, signal=49%	MELTF/C9/ATRN/SDCBP/FOLR1/PROM1/ADGRG6/GOLM1/CD59/PODXL/CD44/PIGR/CALM1/FOLH1/CD9/AQP5	16/26	16	*
	Immunoglobulins	Immunoglobulin complex circulating	34	-0.688811	-1.88475	1.37407e+08	0.000923375	0.000870726	119	tags=59%, list=14%, signal=53%	IGKV3-20/IGHV5-51/IGLC2/IGHV3-72/IGHV3-38/IGLL1/IGHV3-74/IGHA1/IGHV3-64/IGHV6-1/PIGR/IGHV3-35/IGKC/IGHV3-49/JCHAIN/IGHV4-34/IGHV3-64D/IGHV3-15/IGHV1OR15-1/IGHV3-7	20/34	20	***
		Immunoglobulin complex	64	-0.727273	-2.14691	1e-10	3.36e-08	3.16842e+06	121	tags=59%, list=14%, signal=55%	IGLV3-21/IGKV3-20/IGHV5-51/IGLC2/IGHV3-72/IGHV3-38/IGLL1/IGLV9-49/IGHV3-74/IGKV1D-33/IGKV1-39/IGKV2-40/IGHA1/IGLV2-8/IGKV3D-11/IGHV3-64/IGKV3-7/IGHV6-1/IGKV1-27/PIGR/IGKV2D-24/IGLV1-47/IGHV3-35/IGKC/IGHV3-49/IGLV6-57/IGKV4-1/IGKV1-16/JCHAIN/IGHV4-34/IGHV3-64D/IGHV3-15/IGKV3D-15/IGKV2D-28/IGKV1-8/IGHV1OR15-1/IGHV3-7/IGLV2-18	38/64	38	***
MF	Structural constituent of cytoskeleton	Structural constituent of cytoskeleton	29	0.560436	2.09186	0.000254258	0.0274598	0.0264963	103	tags=41%, list=12%, signal=38%	MSN/KRT16/KRT5/DSP/KRT9/KRT6B/KRT6A/TUBA4A/ACTB/PPL/TUBB4B/ACTG1	01,12,2029	12	*
	Binding	Signaling receptor binding	133	-0.493333	-1.53074	0.000241483	0.0274598	0.0264963	271	tags=49%, list=31%, signal=40%	DNM2/HSP90B1/STAT1/TUBB/SLC9A3R1/IGLL5/C3/IGHV1-69/AGR2/PLG/TF/EPS8L1/PSCA/IGHV1-18/APOB/P4HB/IGHG1/NSF/KNG1/THBS1/ANG/FGB/HSPG2/FGA/GNAI2/SDCBP/MYH9/APOE/HRG/IGHA2/S100A4/VTN/FGG/FAM3B/SFRP1/ERAP1/IGHV5-51/IGLC2/IGHV3-72/IGHV3-38/IGLL1/CLU/IGHV3-74/IGHA1/IGHV3-64/IGHV6-1/IGHV3-35/IGKC/IGHV3-49/GRN/JCHAIN/IGHV4-34/IGHV3-64D/TIMP1/IGHV3-15/DPP4/CD9/LACRT/LCN1/A2M/MFGE8/IGHV1OR15-1/DKK4/GLG1/IGHV3-7	65/133	65	*
		Immunoglobulin receptor binding	32	-0.684824	-1.85682	5.46203e+09	0.011798	0.011384	108	tags=56%, list=12%, signal=51%	IGHV5-51/IGLC2/IGHV3-72/IGHV3-38/IGLL1/IGHV3-74/IGHA1/IGHV3-64/IGHV6-1/IGHV3-35/IGKC/IGHV3-49/JCHAIN/IGHV4-34/IGHV3-64D/IGHV3-15/IGHV1OR15-1/IGHV3-7	18/32	18	*
		Antigen binding	54	-0.688638	-1.99734	1.93164e+06	8.34468e+08	8.05189e+08	121	tags=56%, list=14%, signal=51%	IGLV3-21/IGKV3-20/IGHV5-51/IGLC2/IGHV3-72/IGHV3-38/IGLL1/IGHV3-74/IGKV1D-33/IGKV1-39/IGKV2-40/IGHA1/IGLV2-8/IGKV3D-11/IGHV3-64/IGHV6-1/IGLV1-47/IGHV3-35/IGKC/IGHV3-49/IGLV6-57/IGKV4-1/IGKV1-16/JCHAIN/IGHV4-34/IGHV3-64D/IGHV3-15/IGKV2D-28/IGHV1OR15-1/IGHV3-7	30/54	30	***
