# Supplementary material for: Identification and validation of a tear fluid-derived protein biomarker signature in patients with amyotrophic lateral sclerosis
Source: Acta Neuropathol Commun. 2025 Sep 2;13:187. doi: 10.1186/s40478-025-02109-6 (PMC12403336; doi:10.1186/s40478-025-02109-6)
Supplement: Supplementary file 4 — Supplementary Material 4 [file 40478_2025_2109_MOESM4_ESM.xlsx]

## Sheet: Protein tier list
Protein	Avg weight LR BS	Standard error BS	BS FDR	-log(FDR)	Difference(log2 FC)	Significant in DAA
PFKL	-4.91632	1.63928	0	3.52371	-0.235444	+
SERPINA3	-4.38041	1.74813	0	2.49668	-0.34091	+
CAPZA2	-2.76432	0.853737	0	3.80895	-0.371987	+
GMPPA	-2.74273	0.543642	0	2.92289	-0.401089	+		Legend
ALDH16A1	-2.56698	0.760465	0	1.53415	-0.685036	+
CRYM	-1.95079	0.592998	0	2.32734	-0.408113	+		+	Significantly abundant proteins from DAA
HP	-1.92219	0.175625	0	6.47634	-0.958687	+		-	Not significantly abundant proteins from DAA
SERPINC1	-1.50813	0.21783	2.19733e-253	2.7143	-0.469009	+
LYPD2	-1.3492	0.389673	1.01488e-236	2.10585	-0.335686	+
EIF2S2	-1.21784	0.264111	7.56598e-266	2.82543	-1.5001	+		Proteins were sorted for:
SCGB1D1	-0.62985	0.247827	3.17247e-181	2.51003	-0.59395	+			Low FDR from BS
CALM1.CALM2.CALM3	-0.380641	0.212247	1	5.07629	-0.460748	+			High avg weight in linear regression model BS
MSLN	-0.371793	0.0941934	2.2664e-63	3.09872	-0.650682	+			Low error from BS
GPS1	-0.299395	0.157893	1	2.79063	-0.330512	+			High -log(FDR)
ACTR1B	-0.206388	0.10639	1	2.63666	-0.331193	+			High absolute difference log2FC
GALNT5	-0.205326	0.0916786	1	3.42814	-0.639504	+
IGHV1.46	-0.151035	0.0898772	1	1.94196	-0.434862	+
SUMO3.SUMO3.SUMO3.SUMO3.SUMO2.SUMO2.SUMO4	0.0658216	0.0398109	1	2.30546	0.389775	+
LGALS7	0.0897051	0.092817	1	1.63932	0.454637	+
GSN Isoform 2	0.750024	0.352307	5.54172e-07	2.29537	0.309134	+
HNRNPD	0.962945	0.3582	3.09043e-76	1.98318	0.31599	+
WARS	1.46628	0.221819	9.30227e-75	1.65228	0.55994	+
PSMB2	1.67137	0.141625	4.77922e-91	3.14642	0.317056	+
TMEM189.UBE2V1.UBE2V1.UBE2V1.UBE2V1.UBE2V1	2.57253	0.515647	1.25802e-69	3.87796	0.742675	+
RNPEP	-5.15482	1.98708	0	2.35623	-0.177788	-
PFN1	-3.88335	1.67424	0	2.14387	-0.180942	-
TUBB	-3.66101	1.38427	0	3.16486	-0.150818	-
CRYL1	-3.22729	1.145	3.79483e-308	1.35183	-0.233927	-
PSMB8	-3.11981	1.13373	0	1.49303	-0.283644	-
FGB	-3.03011	1.2793	6.81543e-186	0.858142	-0.22371	-
APOBEC3A	-2.89917	0.66552	0	1.42739	-0.25352	-
RABGGTA	-2.25568	1.11204	2.06945e-229	1.50564	-0.214116	-
STARD10	-2.01867	0.679158	1.56924e-237	0.638049	-0.13187	-
EPS8L1	-1.83377	0.298234	4.74105e-276	0.905722	-0.177477	-
FKBP4	-1.70342	0.272993	0	1.754	-0.274748	-
SPTAN1	-1.08223	0.433706	2.93074e-119	1.08259	-0.281641	-
GFPT1	-1.07871	0.133301	2.75667e-224	1.23582	-0.138905	-
CARHSP1	-0.869331	0.224469	3.95451e-98	0.908628	-0.161846	-
RAP1A	-0.835232	0.286534	3.75492e-77	0.421075	-0.120913	-
EIF4H	-0.738295	0.294601	3.14887e-85	0.35812	-0.116976	-
ALDH1L1	-0.615796	0.17554	1.06718e-148	0.814135	-0.151133	-
IGHV1.69	-0.46856	0.184363	9.77077e-11	0.20092	-0.164603	-
EFHD2	-0.459247	0.208599	3.54502e-12	0.803358	-0.12873	-
IL1RN	-0.393724	0.161364	7.18512e-40	0.306965	-0.0750133	-
DYNC1H1	-0.389633	0.076848	3.95723e-111	1.13983	-0.467956	-
LDHB	-0.315678	0.224877	2.11866e-130	1.56063	-0.225209	-
LHPP	-0.156468	0.0940354	2.23397e-49	0.985924	-0.288409	-
AGR2	-0.123727	0.0665832	1	0.603757	-0.165694	-
ADH7	-0.09287	0.0396311	1	0.650975	-0.105685	-
RPL30	-0.0640782	0.0295278	1	1.07102	-0.235538	-
PAICS	-0.0245849	0.0160795	1	1.12629	-0.194438	-
S100P	-0.00286375	0.000436709	1	0.3295	-0.136528	-
ARHGAP1	1.94293e-05	0	1	1.09423	0.207685	-
FABP5	0.0434006	0.0103904	7.12116e-15	0.33145	0.0790829	-
ATP6V1B2	0.0584009	0.0364609	1	1.33067	0.147246	-
SNX1	0.107794	0.0563001	1	1.23684	0.23018	-
hCG_2039566..H2AC4.H2AC11.H2AC7.HIST2H2AC.HIST2H2AA3.HIST3H2A.HIST1H2AC.HIST1H2AH.H2AC14.H2AFJ	0.18658	0.0574039	1	0.748776	0.29416	-
TUBA4A	0.215865	0.101635	1	1.43936	0.191595	-
ALDOA	0.222256	0.168129	1	2.37033	0.151669	-
NAGK	0.242434	0.115885	1	1.80011	0.228607	-
SERPINB1	0.277632	0.167745	0.000145435	1.19156	0.1592	-
KRT16	0.380071	0.17814	1	0.883648	0.287207	-
ANXA2	0.419276	0.0776721	2.66222e-35	1.34478	0.18277	-
MAPK3	0.421561	0.146707	1.83837e-21	1.2928	0.189318	-
MELTF	0.480002	0.254889	2.04512e-06	0.668379	-0.217522	-
HEBP2	0.621129	0.241383	1.0094e-29	0.287024	0.0538349	-
DGKA	0.690484	0.254944	1.01568e-37	0.594209	0.134059	-
CHMP3	1.02466	0.208634	8.29499e-78	1.24794	0.241538	-
LXN	1.16341	0.477528	1.79884e-19	1.01675	0.174251	-
ANXA3	1.30267	0.596325	0.000548974	0.353914	0.060496	-
OPRPN	1.51209	0.587617	6.51219e-17	0.171953	0.0884965	-
USP14	1.67701	0.686411	1.49441e-05	0.348336	0.0774714	-
GSN	2.30141	0.520098	6.74351e-65	1.70472	0.111491	-
H3.3A.H3.3A.H3.3B.H3.3B.H3.3B.H3C1.H3.3A.HIST3H3.HIST2H3A	2.55552	0.780539	8.07552e-37	1.02911	0.46312	-
DSP	2.80112	0.527517	1.24797e-41	0.783617	0.257411	-
YWHAB	2.94452	1.14885	6.58016e-19	1.01808	0.161549	-
CDC42	3.10584	0.875084	1.83338e-51	2.63278	0.238319	-
EIF6	3.31229	0.837516	3.77584e-41	1.362	0.208915	-
CAPNS2	3.40607	1.01747	3.32283e-38	1.32898	0.211217	-
APOA4	3.48453	1.16035	1.39087e-38	1.0924	0.27593	-
IGHG2	3.95722	1.33993	6.42589e-06	0.0792248	0.0331264	-
GLUL	4.54758	1.32054	1.6359e-32	2.19349	0.264633	-
ENO1	6.32555	2.24272	1.17976e-19	2.17296	0.198821	-
