# Supplementary material for: Identification and validation of a tear fluid-derived protein biomarker signature in patients with amyotrophic lateral sclerosis
Source: Acta Neuropathol Commun. 2025 Sep 2;13:187. doi: 10.1186/s40478-025-02109-6 (PMC12403336; doi:10.1186/s40478-025-02109-6)
Supplement: Supplementary file 5 — Supplementary Material 5 [file 40478_2025_2109_MOESM5_ESM.xlsx]

## Sheet: Sheet 1 (2)
Protein	Abundance Mean ALS/Mean CTRL	Log10_Abundance	Rank	Highlight
DDB1	5.9348	0.773406	876	Top 10 most abundant
F5	3.51709	0.546184	875	Top 10 most abundant
KRT6B	2.94883	0.469649	874	Top 10 most abundant
KRT77	2.85584	0.455733	873	Top 10 most abundant
KRT13	2.81124	0.448898	872	Top 10 most abundant
KRT10	2.77294	0.442941	871	Top 10 most abundant
GBP1	2.67247	0.426913	870	Top 10 most abundant
PFAS	2.53884	0.404636	869	Top 10 most abundant
LGALS7	2.44635	0.388519	868	Top 10 most abundant
KRT17	2.35242	0.371514	867	Top 10 most abundant
KRT6A	2.26291	0.354666	866	neutral
KRT74;KRT74;KRT73	2.21891	0.346139	865	neutral
WARS	2.11351	0.325004	864	neutral
CASP14	2.10808	0.323887	863	neutral
KRT16	2.04432	0.310548	862	neutral
KRT2	2.02213	0.305809	861	neutral
ARG1	2.0201	0.305373	860	neutral
KRT5	1.96451	0.293255	859	neutral
KRT1	1.93515	0.286714	858	neutral
SERPINB12	1.90505	0.279906	857	neutral
RARS	1.87541	0.273096	856	neutral
DCD	1.78326	0.251215	855	neutral
KPRP	1.7753	0.249272	854	neutral
JUP	1.64314	0.215674	853	neutral
PSMB6	1.52398	0.18298	852	neutral
;TGM3	1.51911	0.181589	851	neutral
PDCD6IP	1.48639	0.172134	850	neutral
DSP	1.45161	0.16185	849	neutral
SERPINB3	1.42711	0.154459	848	neutral
PSAPL1	1.38428	0.141223	847	neutral
GALNT7	1.38359	0.141006	846	neutral
TMEM189-UBE2V1;UBE2V1;UBE2V1;UBE2V1;UBE2V1	1.34404	0.128413	845	neutral
KRT14	1.32669	0.122768	844	neutral
KRT9	1.30135	0.114394	843	neutral
CTSD	1.262	0.10106	842	neutral
SUMO3;SUMO3;SUMO3;SUMO3;SUMO2;SUMO2;SUMO4	1.25706	0.0993572	841	neutral
KRT3	1.25639	0.099124	840	neutral
HSPA1L	1.25561	0.098855	839	neutral
GGCT	1.24775	0.0961273	838	neutral
GSTA1	1.24303	0.0944827	837	neutral
QARS	1.23783	0.0926602	836	neutral
SNX1	1.23717	0.0924287	835	neutral
FLG2	1.23471	0.0915635	834	neutral
PDIA3	1.22752	0.0890291	833	neutral
DSG1	1.22658	0.0886961	832	neutral
PSMB8	1.21867	0.0858879	831	neutral
H2BC12;H2BFS;HIST1H2BD;H2BC4;HIST2H2BF;HIST2H2BF;HIST1H2BH;H2BC15;H2BC14;H2BC13;H2BC15	1.21575	0.084843	830	neutral
C5	1.21472	0.0844758	829	neutral
PPM1A	1.21449	0.0843952	828	neutral
LYPLA1	1.20505	0.081006	827	neutral
CLIC6	1.20502	0.0809958	826	neutral
PPP1R7	1.19616	0.0777911	825	neutral
PFN2	1.18793	0.0747891	824	neutral
DCXR	1.18725	0.074543	823	neutral
GLUL	1.18628	0.0741862	822	neutral
HNRNPD	1.18532	0.0738342	821	neutral
SH3BGRL	1.18422	0.0734311	820	neutral
PSMB2	1.18167	0.0724976	819	neutral
GSPT1	1.18098	0.0722427	818	neutral
KIF21A	1.17614	0.0704589	817	neutral
COPB1	1.17522	0.0701192	816	neutral
ANXA1	1.1745	0.0698535	815	neutral
RPL22;;RPL22;RPL22;RPL22;RPL22;RPL22	1.17269	0.0691824	814	neutral
HSPA5	1.16969	0.0680706	813	neutral
CDC42	1.16821	0.0675222	812	neutral
FBP2	1.1669	0.0670349	811	neutral
EHD1	1.16571	0.0665892	810	neutral
ACTR1A	1.16353	0.0657779	809	neutral
PPP3CA	1.16188	0.0651604	808	neutral
BROX	1.15806	0.06373	807	neutral
TUBA4A	1.15663	0.0631945	806	neutral
TAX1BP3	1.15398	0.0621972	805	neutral
SERPINB1	1.15311	0.0618714	804	neutral
RBBP9	1.15301	0.0618337	803	neutral
ENO1	1.14873	0.0602191	802	neutral
APOA4	1.14694	0.0595413	801	neutral
SEPTIN9	1.14539	0.0589526	800	neutral
LANCL1	1.14512	0.0588528	799	neutral
CAPNS2	1.14444	0.0585931	798	neutral
HSPA8	1.13888	0.0564782	797	neutral
ACTB	1.13264	0.054092	796	neutral
BAG1	1.12591	0.0515044	795	neutral
ANXA2	1.12489	0.0511112	794	neutral
GRHPR	1.12295	0.0503617	793	neutral
NARS1	1.12213	0.0500441	792	neutral
CASP1	1.12211	0.0500348	791	neutral
S100A6	1.12118	0.0496773	790	neutral
ALDOA	1.12084	0.0495434	789	neutral
TES	1.11844	0.0486146	788	neutral
PRDX2	1.11696	0.0480372	787	neutral
ALDH1A1	1.11668	0.0479291	786	neutral
PPP1CA	1.11491	0.047239	785	neutral
RAB1B	1.11209	0.0461391	784	neutral
NAGK	1.11161	0.0459522	783	neutral
CHMP3	1.11115	0.0457708	782	neutral
AHNAK	1.11025	0.04542	781	neutral
GMPR2	1.10925	0.0450277	780	neutral
VPS4B	1.10828	0.0446507	779	neutral
PTMA	1.1072	0.044226	778	neutral
S100A11	1.10556	0.0435814	777	neutral
ANXA8L1	1.10507	0.0433913	776	neutral
ACP1	1.1042	0.0430459	775	neutral
FDPS	1.10285	0.0425174	774	neutral
MAPK3	1.1027	0.0424569	773	neutral
ARHGAP1	1.10243	0.0423495	772	neutral
IGHG3	1.10098	0.0417775	771	neutral
PSMA3	1.09818	0.0406729	770	neutral
ATP6V1B2	1.0979	0.0405628	769	neutral
CPPED1	1.09628	0.0399197	768	neutral
CLINT1	1.09554	0.03963	767	neutral
PSMC1	1.09515	0.0394756	766	neutral
GALK1	1.09239	0.0383767	765	neutral
CRIP1	1.09154	0.0380388	764	neutral
AK1	1.08992	0.0373954	763	neutral
TYMP	1.08982	0.0373567	762	neutral
PSMA1	1.08829	0.0367465	761	neutral
CCT7	1.08818	0.0366995	760	neutral
DDX39B	1.0879	0.0365879	759	neutral
EIF6	1.08724	0.0363259	758	neutral
VTA1	1.08714	0.036287	757	neutral
EIF5	1.08714	0.0362843	756	neutral
LGALS3	1.08712	0.0362768	755	neutral
CA13	1.08687	0.0361777	754	neutral
UBE2D3;UBE2D2;UBE2D3;UBE2D3;UBE2D2;UBE2D3;UBE2D3;UBE2D3;UBE2D3;UBE2D2;UBE2D2	1.08617	0.0358961	753	neutral
ALDH1A3	1.08414	0.0350871	752	neutral
SET	1.08378	0.0349431	751	neutral
HSP90AA1	1.08376	0.0349313	750	neutral
DGKA	1.08344	0.0348038	749	neutral
KPNB1	1.08205	0.0342487	748	neutral
CUL5	1.08131	0.0339503	747	neutral
PA2G4	1.08043	0.0335973	746	neutral
PHGDH	1.08003	0.0334363	745	neutral
AP1G1	1.07898	0.0330144	744	neutral
PPL	1.07898	0.0330129	743	neutral
BZW1	1.07629	0.0319287	742	neutral
PGM2	1.07609	0.0318504	741	neutral
NAPRT	1.07539	0.0315675	740	neutral
TRIP10	1.075	0.0314087	739	neutral
CAPNS1	1.07422	0.0310948	738	neutral
AP1M2	1.0713	0.0299118	737	neutral
NAP1L4	1.07075	0.0296868	736	neutral
DIAPH1	1.07063	0.0296397	735	neutral
NCCRP1	1.06715	0.0282256	734	neutral
PGM3	1.0667	0.0280417	733	neutral
NACA	1.06661	0.0280041	732	neutral
PSME2	1.06621	0.0278408	731	neutral
PPP2R2A	1.0635	0.0267393	730	neutral
RPL12	1.06262	0.0263789	729	neutral
CORO1B	1.06102	0.0257229	728	neutral
VPS35	1.06038	0.025463	727	neutral
GSN	1.05753	0.0242938	725	neutral
GSN	1.05753	0.0242938	726	neutral
SEPTIN2	1.05753	0.0242913	724	neutral
PDXK	1.057	0.0240747	723	neutral
IGHV3-13	1.05654	0.0238845	722	neutral
RPL7	1.05642	0.023836	721	neutral
GYG1	1.05576	0.0235666	720	neutral
AHCYL2	1.05561	0.0235028	719	neutral
SLC34A2	1.05483	0.0231818	718	neutral
DBNL	1.05471	0.0231322	717	neutral
F11R	1.05451	0.0230524	716	neutral
SAR1A	1.05429	0.02296	715	neutral
MYL6	1.05411	0.022884	714	neutral
VPS25	1.05409	0.0228765	713	neutral
COPG1	1.05195	0.0219956	712	neutral
YWHAZ	1.05177	0.0219203	711	neutral
PDCD4	1.05152	0.0218159	710	neutral
HEBP2	1.05072	0.0214864	709	neutral
PITPNA	1.05066	0.0214625	708	neutral
PGM1	1.05057	0.021425	707	neutral
RPS2	1.05054	0.0214114	706	neutral
EEF1D	1.05022	0.0212783	705	neutral
ITIH2	1.04966	0.0210506	704	neutral
PKM	1.04958	0.0210173	703	neutral
CAPS	1.04954	0.0209999	702	neutral
CHMP4B	1.049	0.0207769	701	neutral
YWHAQ	1.04873	0.0206628	700	neutral
NUTF2	1.0483	0.0204876	699	neutral
LXN	1.04722	0.0200396	698	neutral
TSN	1.04704	0.0199636	697	neutral
GPX4	1.0458	0.0194488	696	neutral
YWHAE	1.04558	0.0193583	695	neutral
BLMH	1.04536	0.0192642	694	neutral
PRKCD	1.04358	0.0185247	693	neutral
NDRG1	1.04331	0.0184149	692	neutral
ANXA3	1.04291	0.0182481	691	neutral
FABP5	1.04251	0.0180815	690	neutral
ALDH7A1	1.04183	0.0177989	689	neutral
EEF2	1.0414	0.0176174	688	neutral
YWHAB	1.04105	0.0174696	687	neutral
MYL12A;MYL12B;MYL12A	1.04079	0.0173618	686	neutral
CAST	1.04063	0.0172956	685	neutral
TXNDC17	1.0403	0.0171604	684	neutral
HNRNPA1	1.03996	0.0170183	683	neutral
ESD	1.03924	0.0167155	682	neutral
EEF1A1;EEF1A1P5	1.03922	0.0167069	681	neutral
ARF4	1.0376	0.0160294	680	neutral
RPS3A	1.03758	0.0160208	679	neutral
H1-4	1.03724	0.0158775	678	neutral
SULT2B1	1.03709	0.0158184	677	neutral
GC	1.03708	0.0158136	676	neutral
PSMA7	1.03705	0.0157999	675	neutral
MIF	1.03514	0.015	674	neutral
IGKV6D-21	1.03484	0.0148718	673	neutral
USP5	1.03478	0.0148499	672	neutral
EEF1G	1.03477	0.0148432	671	neutral
HSPB1	1.03458	0.0147646	670	neutral
EIF3F	1.03406	0.014546	669	neutral
PTER	1.03385	0.0144581	668	neutral
GBA	1.03319	0.0141813	667	neutral
LAP3	1.03185	0.0136162	666	neutral
TSTA3	1.03016	0.0129031	665	neutral
CLEC3B	1.02943	0.0125972	664	neutral
PRSS3	1.02918	0.0124911	663	neutral
TPI1	1.02913	0.0124723	662	neutral
H4C1	1.0279	0.0119504	661	neutral
PSMC6	1.02769	0.0118613	660	neutral
DSTN	1.02726	0.0116785	659	neutral
UCHL3	1.02682	0.0114931	658	neutral
MCTS1	1.02642	0.0113255	657	neutral
CRIP2	1.02489	0.0106782	656	neutral
RTCB	1.02455	0.0105317	655	neutral
PLS1	1.02443	0.0104819	654	neutral
DARS	1.02403	0.0103107	653	neutral
NIT2	1.0229	0.0098322	652	neutral
ARHGDIB	1.02281	0.00979604	651	neutral
DERA	1.02216	0.00951987	650	neutral
APEH	1.02211	0.00949625	649	neutral
TUBB4B	1.02151	0.00924358	648	neutral
DNPEP	1.02147	0.00922623	647	neutral
CCT5	1.02117	0.00909629	646	neutral
CDC37	1.02107	0.00905474	645	neutral
PSMD5	1.02055	0.0088363	644	neutral
ACTC1;ACTA1	1.02015	0.00866514	643	neutral
PABPC1	1.02014	0.00866183	642	neutral
PSMB1	1.02004	0.00861815	641	neutral
ACTN4	1.01994	0.00857282	640	neutral
MYO6	1.01992	0.00856707	639	neutral
ASNA1	1.01986	0.00854194	638	neutral
RPSA	1.01962	0.00843931	637	neutral
GART	1.01954	0.00840631	636	neutral
PMM2	1.01952	0.00839651	635	neutral
AHCYL1	1.01941	0.00834821	634	neutral
PSMD1	1.01904	0.00819278	633	neutral
cDNA FLJ55673, highly similar to Complement factor B	1.0184	0.00791892	632	neutral
ASS1	1.01805	0.00776738	631	neutral
GPD1L	1.01744	0.00750847	630	neutral
PRDX1	1.0173	0.00745065	629	neutral
CALML3	1.01697	0.00730955	628	neutral
OLA1	1.016	0.00689584	627	neutral
PGLS	1.01585	0.00682806	626	neutral
VPS26A	1.01581	0.00681277	625	neutral
H3-3A;H3-3A;H3-3B;H3-3B;H3-3B;H3C1;H3-3A;HIST3H3;HIST2H3A	1.01575	0.00678656	624	neutral
GLOD4	1.01533	0.00660513	623	neutral
hCG_2043426;DDX19B;DDX19A;DDX19A;DDX19B;DDX19B;DDX19B	1.01506	0.00648979	622	neutral
ITIH1	1.01426	0.00614952	621	neutral
ANXA5	1.01413	0.00609392	620	neutral
VCL	1.0136	0.00586873	619	neutral
PEPD	1.01333	0.00575209	618	neutral
BDH2	1.01263	0.00545137	617	neutral
CTTN	1.01227	0.00529676	616	neutral
GAPDH	1.01205	0.00520309	615	neutral
MDH1	1.01188	0.00512923	614	neutral
NDRG2	1.0117	0.00505331	613	neutral
EZR	1.01143	0.00493487	612	neutral
FNTA	1.01139	0.00491932	611	neutral
GNPDA1	1.01076	0.00464939	610	neutral
ATP6V1E1	1.01051	0.00453948	609	neutral
PSMA5	1.0079	0.00341591	608	neutral
TJP2;;TJP2;TJP2;TJP2;TJP2;TJP2	1.00778	0.00336735	607	neutral
CCT4	1.00725	0.00313941	606	neutral
RAN	1.00723	0.00312742	605	neutral
PYGB	1.00678	0.00293249	604	neutral
TXNL1	1.00491	0.00212705	603	neutral
PPP2R1A	1.00482	0.00209036	602	neutral
HARS	1.00467	0.00202515	601	neutral
SFN	1.00467	0.00202392	600	neutral
RPS25	1.0038	0.00164862	599	neutral
GDI1	1.00379	0.00164396	598	neutral
PPCS	1.00374	0.00162023	597	neutral
RAB7A	1.00323	0.00139919	596	neutral
SERPINF1	1.00319	0.0013839	595	neutral
GSTP1	1.00313	0.00135682	594	neutral
YWHAG	1.00304	0.00131897	593	neutral
PSMA6	1.00262	0.00113852	592	neutral
DNAJB1	1.00254	0.00110302	591	neutral
EEF1B2	1.00174	0.000754406	590	neutral
RPL14	1.00162	0.000703973	589	neutral
EIF3B	1.00155	0.00067112	588	neutral
SORD	1.00142	0.000617456	587	neutral
CST2	1.00139	0.000605166	586	neutral
MTHFD1	1.00053	0.000228985	585	neutral
ARPC5L	1.00023	0.00010057	584	neutral
NT5C2	1.00011	4.57829e-05	583	neutral
LRRC47	1.00009	4.04945e-05	582	neutral
TALDO1	0.999985	-6.51182e-06	581	neutral
TARS1	0.999254	-0.000324064	580	neutral
SEC31A	0.998621	-0.000599284	579	neutral
C12orf10	0.998583	-0.000615949	578	neutral
CNDP2	0.998462	-0.000668418	577	neutral
FASN	0.998105	-0.000823556	576	neutral
ATP6V1A	0.996885	-0.001355	575	neutral
HNRNPK	0.996589	-0.00148385	574	neutral
FBP1	0.996197	-0.00165475	573	neutral
DAG1	0.996006	-0.00173809	572	neutral
MAPK1	0.995946	-0.00176405	571	neutral
ATP6V1G1	0.994462	-0.00241176	570	neutral
HSPA1B;HSPA1A;HSPA1B	0.994312	-0.00247721	569	neutral
CCT2	0.99424	-0.00250886	568	neutral
ACTG1	0.994091	-0.00257372	567	neutral
F2	0.994065	-0.00258506	566	neutral
CCT3	0.993962	-0.00263033	565	neutral
CAB39L	0.993796	-0.00270271	564	neutral
DDT	0.993578	-0.00279804	563	neutral
BLVRB	0.993476	-0.00284261	562	neutral
ADK	0.993113	-0.00300137	561	neutral
RPS3	0.992795	-0.00314028	560	neutral
SERPINB5	0.99228	-0.00336585	559	neutral
SNX2	0.991905	-0.00352993	558	neutral
IGHV3-43	0.991702	-0.00361895	557	neutral
DPYD	0.991372	-0.00376322	556	neutral
ACSS2	0.99013	-0.00430797	555	neutral
FAM49B	0.989244	-0.00469659	554	neutral
ST13	0.989087	-0.0047653	553	neutral
GMDS	0.98876	-0.00490911	552	neutral
MTAP	0.988657	-0.00495443	551	neutral
RAB2A	0.987347	-0.00553023	550	neutral
TLN1	0.987063	-0.00565494	549	neutral
UBE2N	0.987008	-0.00567927	548	neutral
BNC2	0.986594	-0.00586168	547	neutral
UBE2V2	0.986543	-0.00588383	546	neutral
XDH	0.986165	-0.0060503	545	neutral
KARS1	0.986149	-0.00605766	544	neutral
ACO1	0.985991	-0.00612699	543	neutral
ALDOC	0.985734	-0.00624012	542	neutral
ARL3	0.984675	-0.00670711	541	neutral
SOD3	0.984263	-0.0068889	540	neutral
ADH5	0.983958	-0.00702346	539	neutral
RPS8	0.983011	-0.00744183	538	neutral
GALM	0.982732	-0.00756512	537	neutral
UAP1	0.982492	-0.00767098	536	neutral
PSMC2	0.982189	-0.00780508	535	neutral
GSTZ1	0.981026	-0.0083195	534	neutral
APRT	0.980614	-0.00850205	533	neutral
CASP3	0.980411	-0.00859198	532	neutral
EPS8L2	0.980178	-0.00869485	531	neutral
TXNRD1	0.979865	-0.00883375	530	neutral
NAMPT	0.979801	-0.00886203	529	neutral
PON1	0.979662	-0.00892387	528	neutral
PREP	0.978099	-0.00961731	527	neutral
RNH1	0.977729	-0.00978149	526	neutral
TUBA1B	0.977547	-0.00986251	525	neutral
CAPN1	0.976622	-0.0102733	524	neutral
PEBP1	0.976463	-0.010344	523	neutral
NQO1	0.975722	-0.010674	522	neutral
ACTN1	0.97572	-0.0106746	521	neutral
FH	0.97563	-0.010715	520	neutral
CCDC6	0.975098	-0.0109516	519	neutral
PRKCSH	0.975092	-0.0109543	518	neutral
SELENBP1	0.974976	-0.011006	517	neutral
KLK11	0.974874	-0.0110517	516	neutral
OPRPN	0.974866	-0.011055	515	neutral
STARD10	0.974802	-0.0110835	514	neutral
GMPPB	0.974668	-0.0111431	513	neutral
FKBP1A	0.974662	-0.0111458	512	neutral
TUBA1C	0.973858	-0.0115045	511	neutral
PPP1CB	0.97303	-0.0118739	510	neutral
UBA1	0.972757	-0.0119958	509	neutral
SCRN1	0.972755	-0.0119967	508	neutral
PYGL	0.9724	-0.012155	507	neutral
GPX1	0.972321	-0.0121902	506	neutral
TPT1	0.972155	-0.0122644	505	neutral
ARCN1	0.97202	-0.0123248	504	neutral
AHCY	0.971597	-0.0125137	503	neutral
LDHA	0.971389	-0.012607	502	neutral
ATIC	0.971001	-0.0127803	501	neutral
ASAH1	0.970477	-0.0130149	500	neutral
TUBA4B	0.969632	-0.0133929	499	neutral
CCT8	0.968895	-0.0137232	498	neutral
CARHSP1	0.968696	-0.0138126	497	neutral
GSDMB	0.968656	-0.0138306	496	neutral
ALDH9A1	0.968404	-0.0139433	495	neutral
NT5C	0.968301	-0.0139896	494	neutral
AKR1A1	0.96818	-0.014044	493	neutral
BLVRA	0.967602	-0.014303	492	neutral
PPA1	0.967442	-0.0143749	491	neutral
RAC1	0.966825	-0.0146522	490	neutral
COPB2	0.966219	-0.0149243	489	neutral
IGLV1-51	0.965371	-0.0153058	488	neutral
CASP7	0.964925	-0.0155063	487	neutral
EFEMP1	0.964464	-0.015714	486	neutral
PRDX6	0.963529	-0.0161352	485	neutral
PLS3	0.963483	-0.0161561	484	neutral
NUDT5	0.962775	-0.0164753	483	neutral
PPP2CA	0.962731	-0.0164951	482	neutral
EML2	0.962704	-0.0165071	481	neutral
GDI2	0.96256	-0.0165721	480	neutral
NANS	0.962495	-0.0166013	479	neutral
GALE	0.961473	-0.0170631	478	neutral
COPA	0.960921	-0.0173123	477	neutral
ANXA7	0.959992	-0.0177325	476	neutral
CRYZ	0.959792	-0.0178231	475	neutral
C11orf54	0.958201	-0.0185436	474	neutral
IMPA1	0.957899	-0.0186802	473	neutral
APOA1	0.957053	-0.0190641	472	neutral
RPS14	0.956225	-0.0194398	471	neutral
CALR	0.956221	-0.0194415	470	neutral
LTA4H	0.955542	-0.0197502	469	neutral
SDC1	0.955464	-0.0197856	468	neutral
KIF5B	0.954794	-0.0200901	467	neutral
PDLIM1	0.953733	-0.0205732	466	neutral
COMT	0.953667	-0.020603	465	neutral
TKFC	0.953367	-0.0207398	464	neutral
ANXA11	0.953125	-0.0208503	463	neutral
CRYAB	0.953023	-0.0208964	462	neutral
AGT	0.952964	-0.0209233	461	neutral
SSH3	0.95014	-0.0222125	460	neutral
MVP	0.950035	-0.0222604	459	neutral
AKR7A2	0.949815	-0.022361	458	neutral
SERPINB2	0.949253	-0.0226181	457	neutral
PRDX5	0.94895	-0.0227565	456	neutral
PSMD12	0.948695	-0.0228733	455	neutral
SHMT1	0.948484	-0.0229702	454	neutral
USP14	0.948095	-0.0231484	453	neutral
VPS4A	0.947676	-0.0233403	452	neutral
DNPH1	0.947521	-0.0234114	451	neutral
PSMB4	0.947422	-0.0234564	450	neutral
PGAM1	0.947339	-0.0234947	449	neutral
EIF4H	0.947329	-0.0234989	448	neutral
RPS4X	0.947264	-0.0235289	447	neutral
CYFIP1	0.946319	-0.0239623	446	neutral
CAPN2	0.94622	-0.0240078	445	neutral
PRPS1	0.946085	-0.0240697	444	neutral
ARPC4-TTLL3;ARPC4	0.945856	-0.0241749	443	neutral
PSMA2	0.945406	-0.0243818	442	neutral
ENO2	0.945016	-0.0245609	441	neutral
EPS8L1	0.944982	-0.0245766	440	neutral
GSS	0.944825	-0.0246488	439	neutral
UGP2	0.944488	-0.0248034	438	neutral
XPNPEP1	0.94336	-0.0253226	437	neutral
CLIC1	0.942594	-0.0256753	436	neutral
RPS9	0.941865	-0.0260111	435	neutral
RPL30	0.940513	-0.026635	434	neutral
STK39	0.940004	-0.0268702	433	neutral
HNRNPA2B1	0.938998	-0.0273355	432	neutral
NIBAN2	0.938803	-0.0274257	431	neutral
IGHM	0.938276	-0.0276696	430	neutral
SLC9A3R1	0.938044	-0.0277766	429	neutral
IGHV5-10-1	0.937628	-0.0279693	428	neutral
VWA5A	0.937438	-0.0280574	427	neutral
TRIM25	0.936614	-0.0284393	426	neutral
EIF4E	0.935995	-0.0287267	425	neutral
PSMB10	0.935904	-0.0287687	424	neutral
ALB	0.935473	-0.0289685	423	neutral
ANXA4	0.934988	-0.0291939	422	neutral
PARK7	0.934747	-0.0293061	421	neutral
STEAP4	0.934639	-0.029356	420	neutral
CFL1	0.933859	-0.0297187	419	neutral
EIF3CL;EIF3C;EIF3C	0.933837	-0.029729	418	neutral
MUC1	0.933781	-0.0297551	417	neutral
ABHD14B	0.933723	-0.0297818	416	neutral
G6PD	0.933335	-0.0299626	415	neutral
PTPA	0.933122	-0.0300615	414	neutral
UBA7	0.931808	-0.0306737	413	neutral
IL1RN	0.930497	-0.031285	412	neutral
TAGLN2	0.929278	-0.0318543	411	neutral
CLTC	0.928144	-0.0323846	410	neutral
RAB25	0.928038	-0.0324341	409	neutral
UPK3BL1;UPK3BL2	0.927687	-0.0325986	408	neutral
IGHV4-28	0.927473	-0.0326986	407	neutral
RPS6KA3	0.927246	-0.032805	406	neutral
ACTR2	0.926826	-0.0330018	405	neutral
TP53I3	0.926583	-0.0331157	404	neutral
PPIA	0.925943	-0.033416	403	neutral
ARPC2	0.925754	-0.0335042	402	neutral
IDH1	0.924768	-0.0339674	401	neutral
PCBP2	0.924404	-0.0341382	400	neutral
RPL13	0.924164	-0.0342512	399	neutral
PLIN3	0.923922	-0.0343648	398	neutral
CCT6A	0.923703	-0.0344676	397	neutral
PSMD2	0.922366	-0.0350966	396	neutral
APOD	0.922113	-0.0352158	395	neutral
AP1S1	0.922035	-0.0352526	394	neutral
DDX1	0.92182	-0.0353541	393	neutral
NAPA	0.921687	-0.0354163	392	neutral
IDE	0.921493	-0.0355082	391	neutral
RCN1	0.920992	-0.0357441	390	neutral
CMPK1	0.920848	-0.035812	389	neutral
ITIH4	0.920674	-0.0358939	388	neutral
ACTR3	0.920564	-0.0359462	387	neutral
PAFAH1B1	0.919799	-0.036307	386	neutral
LASP1	0.919164	-0.036607	385	neutral
PSMB9	0.918993	-0.036688	384	neutral
COASY	0.918192	-0.0370667	383	neutral
OSBP	0.917988	-0.0371629	382	neutral
KYNU	0.917987	-0.0371637	381	neutral
PSMD3	0.917863	-0.037222	380	neutral
PGK1	0.917409	-0.0374372	379	neutral
ALDH1L1	0.916834	-0.0377093	378	neutral
CFI	0.916804	-0.0377233	377	neutral
CEACAM7	0.916428	-0.0379017	376	neutral
CAP1	0.915733	-0.0382312	375	neutral
HSPA4	0.914892	-0.0386301	374	neutral
UBE2L3	0.914839	-0.0386554	373	neutral
SARS;SARS1	0.914486	-0.038823	372	neutral
CAPG	0.914024	-0.0390424	371	neutral
IGLV3-19	0.913727	-0.0391835	370	neutral
IGLV1-40	0.913214	-0.0394274	369	neutral
ZG16B	0.913002	-0.0395282	368	neutral
VBP1	0.912378	-0.0398254	367	neutral
LRG1	0.911135	-0.040417	366	neutral
ADSS2	0.90992	-0.0409968	365	neutral
SERPINA1	0.909911	-0.0410011	364	neutral
PSMD14	0.90873	-0.041565	363	neutral
ARF3;ARF1	0.908158	-0.0418387	362	neutral
PSMC3	0.908045	-0.0418927	361	neutral
PBDC1	0.907962	-0.0419325	360	neutral
MX1	0.906362	-0.0426982	359	neutral
HSPG2	0.905976	-0.0428832	358	neutral
TGM2	0.905893	-0.0429232	357	neutral
LPO	0.9051	-0.0433035	356	neutral
CRYL1	0.903897	-0.0438809	355	neutral
AHSG	0.903512	-0.0440662	354	neutral
HPX	0.90293	-0.0443458	353	neutral
PCBP1	0.902244	-0.0446762	352	neutral
CAPZB	0.900973	-0.0452884	351	neutral
ATP6V1H	0.900751	-0.0453952	350	neutral
IGKV1-17	0.90067	-0.0454344	349	neutral
RAP1A	0.900425	-0.0455525	348	neutral
PDGFC	0.900287	-0.0456192	347	neutral
ADH7	0.899828	-0.0458406	346	neutral
CTNNA1	0.899732	-0.0458866	345	neutral
EIF4A1	0.899715	-0.0458953	344	neutral
VCP	0.899009	-0.046236	343	neutral
KRT19	0.898538	-0.0464634	342	neutral
ETF1	0.89828	-0.0465881	341	neutral
PAICS	0.898096	-0.0466773	340	neutral
GFPT1	0.896843	-0.0472838	339	neutral
WDR1	0.896714	-0.0473462	338	neutral
PDCD10	0.896295	-0.0475491	337	neutral
ARHGDIA	0.895988	-0.0476977	336	neutral
DNM2	0.895983	-0.0477002	335	neutral
APMAP	0.89578	-0.0477987	334	neutral
NPEPPS	0.894763	-0.0482917	333	neutral
TUBB	0.894575	-0.0483831	332	neutral
ALAD	0.894397	-0.0484698	331	neutral
HLA-C	0.893954	-0.048685	330	neutral
EHD3	0.893806	-0.0487568	329	neutral
RAD23B	0.893645	-0.048835	328	neutral
IGLV8-61	0.893138	-0.0490816	327	neutral
TCP1	0.892966	-0.0491649	326	neutral
CAND1	0.892474	-0.0494045	325	neutral
PTGDS	0.891833	-0.0497166	324	neutral
CAPZA1	0.891557	-0.0498508	323	neutral
ARPC3	0.890957	-0.0501433	322	neutral
CBR1	0.890151	-0.0505366	321	neutral
CTSZ	0.889164	-0.0510181	320	neutral
HMGB1	0.888494	-0.0513453	319	neutral
EFHD2	0.888281	-0.0514496	318	neutral
TMSB4X	0.888165	-0.0515065	317	neutral
RPLP0	0.887958	-0.0516077	316	neutral
FUCA1	0.887907	-0.0516323	315	neutral
SERPINB8	0.887892	-0.0516399	314	neutral
HEXA	0.887647	-0.0517598	313	neutral
AKR1C2	0.887491	-0.0518359	312	neutral
AARS	0.886934	-0.0521087	311	neutral
SOD1	0.885998	-0.0525674	310	neutral
AFM	0.885833	-0.0526482	309	neutral
CPNE3	0.885518	-0.0528024	308	neutral
LYZ	0.885418	-0.0528517	307	neutral
TPP1	0.885034	-0.0530401	306	neutral
HSP90AB1	0.884579	-0.0532631	305	neutral
RPS19	0.883866	-0.0536135	304	neutral
CTSS	0.883626	-0.0537316	303	neutral
ARPC5	0.882725	-0.0541744	302	neutral
GPX3	0.882679	-0.0541974	301	neutral
PTGR1	0.88176	-0.0546495	300	neutral
GOT1	0.881365	-0.054844	299	neutral
HPRT1	0.879907	-0.0555634	298	neutral
PGD	0.879787	-0.0556225	297	neutral
PSCA	0.879662	-0.0556839	296	neutral
ENOPH1	0.878889	-0.0560662	295	neutral
P4HB	0.878221	-0.0563961	294	neutral
AKR1C1	0.87817	-0.0564213	293	neutral
CSTB	0.877949	-0.0565308	292	neutral
GSR	0.877036	-0.0569824	291	neutral
EIF2S1	0.876578	-0.0572096	290	neutral
SH3GL1	0.876298	-0.0573482	289	neutral
CTPS1	0.875857	-0.0575669	288	neutral
ADH1C	0.875322	-0.0578321	287	neutral
ARPC1B	0.874444	-0.0582678	286	neutral
CANT1	0.874318	-0.0583307	285	neutral
OTUB1	0.873478	-0.0587483	284	neutral
TRIM16	0.873418	-0.058778	283	neutral
TWF1	0.87328	-0.0588465	282	neutral
RPL18	0.873133	-0.0589198	281	neutral
HSP90B1	0.872402	-0.0592832	280	neutral
PFN1	0.870868	-0.0600479	279	neutral
RDX	0.869663	-0.0606491	278	neutral
IGHG2	0.869651	-0.0606548	277	neutral
PSMB3	0.868324	-0.061318	276	neutral
YARS	0.868187	-0.0613865	275	neutral
RNPEP	0.867825	-0.0615676	274	neutral
SCIN	0.865708	-0.0626286	273	neutral
GLO1	0.865019	-0.0629742	272	neutral
EIF5A	0.864885	-0.0630418	271	neutral
ACTR1B	0.864859	-0.0630548	270	neutral
SWAP70	0.864653	-0.0631582	269	neutral
PSMD11	0.863777	-0.0635983	268	neutral
IGLL5	0.862446	-0.0642679	267	neutral
AP2A2	0.859866	-0.0655694	266	neutral
STK26	0.858929	-0.0660428	265	neutral
NPC2	0.858386	-0.0663172	264	neutral
ALDH3A1	0.858278	-0.0663718	263	neutral
STIP1	0.856915	-0.0670621	262	neutral
IGKV6-21	0.856327	-0.0673604	261	neutral
AGR2	0.85578	-0.0676379	260	neutral
RAB11B	0.855317	-0.0678727	259	neutral
RACK1	0.854821	-0.0681249	258	neutral
RABGGTA	0.854761	-0.0681552	257	neutral
PSME1	0.854282	-0.0683985	256	neutral
RHOA	0.854124	-0.068479	255	neutral
GMPPA	0.853171	-0.0689639	254	neutral
IGHV2-70D;IGHV2-70	0.85172	-0.0697033	253	neutral
hCG_2039566;;H2AC4;H2AC11;H2AC7;HIST2H2AC;HIST2H2AA3;HIST3H2A;HIST1H2AC;HIST1H2AH;H2AC14;H2AFJ	0.851089	-0.0700248	252	neutral
NSF	0.850937	-0.0701026	251	neutral
APOBEC3A	0.850871	-0.0701361	250	neutral
VTN	0.850688	-0.0702295	249	neutral
NME2;NME1-NME2	0.849949	-0.0706073	248	neutral
GPS1	0.849821	-0.0706728	247	neutral
THBS1	0.847576	-0.0718212	246	neutral
NIT1	0.844605	-0.0733464	245	neutral
RPL6	0.844573	-0.0733626	244	neutral
VAT1	0.844385	-0.0734596	243	neutral
GSTO1	0.842573	-0.0743924	242	neutral
A2ML1	0.841544	-0.0749231	241	neutral
FGB	0.841469	-0.0749621	240	neutral
S100P	0.840209	-0.0756129	239	neutral
PFKL	0.83798	-0.0767663	238	Validated protein signature
IGKV1-5	0.837627	-0.0769492	237	neutral
APOE	0.836933	-0.0773091	236	neutral
PDLIM5	0.83681	-0.0773732	235	neutral
FAM3B	0.834912	-0.0783591	234	neutral
MUC5AC	0.83407	-0.0787974	233	neutral
PFKP	0.833972	-0.0788485	232	neutral
RBP4	0.831777	-0.0799931	231	neutral
KNG1	0.830747	-0.0805312	230	neutral
NEU1	0.829845	-0.0810029	229	neutral
ANPEP	0.829365	-0.0812542	228	neutral
ACAT2	0.829343	-0.0812656	227	neutral
DNAJC3	0.829075	-0.0814064	226	neutral
IGHV1-18	0.82861	-0.0816501	225	neutral
IL18	0.828329	-0.0817971	224	neutral
IQGAP1	0.828138	-0.0818974	223	neutral
CRYM	0.827371	-0.0822999	222	Validated protein signature
LUM	0.827032	-0.0824775	221	neutral
CTSC	0.826238	-0.0828946	220	neutral
SMS	0.824964	-0.0835651	219	neutral
IGKV1D-16	0.824366	-0.0838799	218	neutral
ST3GAL1	0.82352	-0.084326	217	neutral
IGHV1-69	0.820767	-0.0857803	216	neutral
C9	0.820085	-0.0861409	215	neutral
SDF4	0.820007	-0.0861824	214	neutral
MANBA	0.818919	-0.0867592	213	neutral
KRT8	0.818743	-0.0868522	212	neutral
IGKV1-39;IGKV1D-39	0.818574	-0.086942	211	neutral
CD14	0.817777	-0.0873653	210	neutral
GNAI2	0.816709	-0.0879327	209	neutral
SFRP1	0.815563	-0.0885424	208	neutral
IGHV3-35	0.815406	-0.0886263	207	neutral
TNFSF12-TNFSF13;TNFSF13;TNFSF12;TNFSF13;TNFSF13;TNFSF13;TNFSF13;TNFSF13	0.814282	-0.089225	206	neutral
SCGB2A1	0.814016	-0.0893673	205	neutral
RPS27A	0.812466	-0.0901949	204	neutral
TXN	0.810231	-0.0913911	203	neutral
RAB5C	0.809233	-0.0919265	202	neutral
IGHA2	0.809119	-0.0919874	201	neutral
PEBP4	0.805821	-0.0937612	200	neutral
CALML5	0.805493	-0.0939383	199	neutral
GPI	0.804369	-0.0945449	198	neutral
IGLV3-10	0.803285	-0.0951305	197	neutral
IGLV2-8	0.80294	-0.0953169	196	neutral
FKBP4	0.802501	-0.0955545	195	neutral
NIBAN1	0.8017	-0.0959881	194	neutral
FLNB	0.80142	-0.0961397	193	neutral
PNP	0.798812	-0.0975555	192	neutral
PROM1	0.79873	-0.0976002	191	neutral
IGHV3-43D	0.796156	-0.0990019	190	neutral
HEXB	0.795934	-0.099123	189	neutral
S100A4	0.794779	-0.0997537	188	neutral
SERPINB6	0.793734	-0.100325	187	neutral
IGKV3D-20	0.793511	-0.100447	186	neutral
IGHV2-26	0.792902	-0.10078	185	neutral
PLA2G2A	0.792276	-0.101124	184	neutral
CFH	0.79044	-0.102131	183	neutral
APOH	0.788695	-0.103091	182	neutral
IGHV3-72	0.787117	-0.103961	181	neutral
MDH2	0.786388	-0.104363	180	neutral
PLG	0.786376	-0.10437	179	neutral
S100A9	0.78621	-0.104462	178	neutral
IGHV5-51	0.785078	-0.105087	177	neutral
CTBS	0.784654	-0.105322	176	neutral
IGLV7-43	0.784068	-0.105647	175	neutral
GANAB	0.783935	-0.10572	174	neutral
DPP3	0.783508	-0.105957	173	neutral
SERPING1	0.78325	-0.1061	172	neutral
EIF4G1	0.780737	-0.107495	171	neutral
GALNT6	0.780719	-0.107505	170	neutral
LSR	0.780415	-0.107675	169	neutral
ANG	0.77992	-0.10795	168	neutral
GOLM1	0.779383	-0.108249	167	neutral
FOLR1	0.777348	-0.109384	166	neutral
BAX	0.776939	-0.109613	165	neutral
CTSB	0.776514	-0.10985	164	neutral
CTSL	0.775294	-0.110533	163	neutral
PTGES3	0.774687	-0.110874	162	neutral
IGHA1	0.772812	-0.111926	161	neutral
PPIB	0.771971	-0.112399	160	neutral
TF	0.770182	-0.113407	159	neutral
BTD	0.769972	-0.113525	158	neutral
IGHV3-74	0.768866	-0.11415	157	neutral
IGHV3OR16-12	0.768494	-0.114359	156	neutral
CAPZA2	0.767123	-0.115135	155	Validated protein signature
CDH1	0.765639	-0.115976	154	neutral
S100A8	0.76503	-0.116322	153	neutral
ATRN	0.762617	-0.117694	152	neutral
AMBP	0.762204	-0.117929	151	neutral
IGLV3-27	0.760818	-0.118719	150	neutral
NUCB1	0.759566	-0.119434	149	neutral
MELTF	0.758111	-0.120267	148	neutral
DSC2	0.757933	-0.120369	147	neutral
DMBT1	0.757436	-0.120654	146	neutral
SCGB1D1	0.756477	-0.121204	145	neutral
PLTP	0.756078	-0.121434	144	neutral
CD55	0.753548	-0.122889	143	neutral
LDHB	0.752054	-0.123751	142	neutral
PLOD1	0.751216	-0.124235	141	neutral
IGHV3-49	0.749275	-0.125359	140	neutral
C3	0.749094	-0.125464	139	neutral
SPARCL1	0.747243	-0.126538	138	neutral
GLG1	0.747124	-0.126607	137	neutral
IGKV1D-33	0.743789	-0.12855	136	neutral
LYPD2	0.743659	-0.128626	135	neutral
IGLV1-47	0.742855	-0.129096	134	neutral
ERAP1	0.740662	-0.13038	133	neutral
RHOC	0.739254	-0.131206	132	neutral
PIGR	0.738134	-0.131865	131	neutral
HSPA13	0.737833	-0.132042	130	neutral
IGKV1-27	0.737504	-0.132236	129	neutral
IGHV3OR16-9	0.736336	-0.132924	128	neutral
SERPINI1	0.736173	-0.13302	127	neutral
CST4	0.735586	-0.133367	126	neutral
PSAP	0.73459	-0.133955	125	neutral
AP1B1	0.732721	-0.135062	124	neutral
IGLV9-49	0.732597	-0.135135	123	neutral
CALM1;CALM2;CALM3	0.732146	-0.135402	122	neutral
ADGRG6	0.731328	-0.135888	121	neutral
SERPIND1	0.730925	-0.136127	120	neutral
IGLC2;IGLC3	0.728601	-0.13751	119	neutral
OAF	0.727306	-0.138283	118	neutral
MYH14	0.727024	-0.138451	117	neutral
FOLH1	0.726866	-0.138546	116	neutral
APOB	0.726263	-0.138906	115	neutral
SERPINA3	0.725757	-0.139209	114	neutral
LACRT	0.725141	-0.139577	112	neutral
LACRT	0.725141	-0.139577	113	neutral
IGKV3-20	0.724494	-0.139965	111	neutral
PRR4	0.723086	-0.14081	110	neutral
A1BG	0.721989	-0.14147	109	neutral
NUCB2	0.721778	-0.141596	108	neutral
IGHV1-46	0.717467	-0.144198	107	neutral
B2M	0.717365	-0.14426	106	neutral
IGHV4-34	0.717126	-0.144404	105	neutral
CLU	0.716092	-0.145031	104	neutral
IGKV1-8	0.715566	-0.14535	103	neutral
CD9	0.712116	-0.147449	102	neutral
SERPINA6	0.709725	-0.14891	101	neutral
DPP4	0.708113	-0.149898	100	neutral
JCHAIN	0.708112	-0.149898	99	neutral
PRSS8	0.706269	-0.15103	98	neutral
IGLV6-57	0.705392	-0.15157	97	neutral
IGHV3-64D	0.705083	-0.15176	96	neutral
STOM	0.704892	-0.151877	95	neutral
PSMA4	0.70433	-0.152224	94	neutral
QSOX1	0.70365	-0.152644	93	neutral
IGHV3-15	0.703433	-0.152777	92	neutral
C4BPA	0.702246	-0.15351	91	neutral
C4B_2;C4B;C4B	0.70167	-0.153867	90	neutral
CHID1	0.698655	-0.155737	89	neutral
IGHV6-1	0.698383	-0.155906	88	neutral
FMOD	0.694151	-0.158546	87	neutral
CHI3L2	0.693287	-0.159087	86	neutral
IGKV1-16	0.693042	-0.159241	85	neutral
IGHV3-38	0.692763	-0.159416	84	neutral
LGALS3BP	0.692625	-0.159502	83	neutral
CD59;;CD59;CD59	0.691179	-0.160409	82	neutral
HRG	0.690002	-0.16115	81	neutral
RARRES1	0.686868	-0.163127	80	neutral
FGG	0.686133	-0.163591	79	neutral
HTRA1	0.684987	-0.164318	78	neutral
TCN1	0.684441	-0.164664	77	neutral
CALU	0.680505	-0.167169	76	neutral
HYOU1	0.676935	-0.169453	75	neutral
MSLN	0.67681	-0.169533	74	neutral
IGHV3OR15-7	0.676275	-0.169877	73	neutral
SLPI	0.675869	-0.170137	72	neutral
IGHV3-7	0.675746	-0.170217	71	neutral
RNASE4	0.674359	-0.171109	70	neutral
AZGP1	0.672601	-0.172242	69	neutral
SDCBP	0.671651	-0.172857	67	neutral
SDCBP	0.671651	-0.172857	68	neutral
IGKC	0.67142	-0.173006	66	neutral
A2M	0.66992	-0.173977	65	neutral
PODXL	0.669512	-0.174241	64	neutral
LHPP	0.66859	-0.17484	63	neutral
IGLV3-21	0.668396	-0.174966	62	neutral
PIP	0.667715	-0.175409	61	neutral
IGHV3-64	0.666893	-0.175944	60	neutral
CXCL17	0.666459	-0.176226	59	neutral
IGLV2-18	0.665704	-0.176719	58	neutral
SPTAN1	0.665184	-0.177058	57	neutral
CP	0.664006	-0.177828	56	neutral
PAM	0.663168	-0.178377	55	neutral
LTF	0.662436	-0.178856	54	neutral
GRN	0.662215	-0.179001	53	neutral
IGKV2D-24;IGKV2-24	0.660904	-0.179862	52	neutral
CST3	0.659788	-0.180595	51	neutral
TIMP1	0.657374	-0.182187	50	neutral
IGKV3D-11;IGKV3-11	0.653897	-0.184491	49	neutral
SIL1	0.652342	-0.185525	48	neutral
IGLL1	0.650447	-0.186788	47	neutral
RNASET2	0.6502	-0.186953	46	neutral
IGKV3-7	0.646909	-0.189157	45	neutral
IGKV4-1	0.641378	-0.192886	44	neutral
TPM4	0.640461	-0.193507	43	neutral
ADGRV1	0.634572	-0.197519	42	neutral
IGHV1OR15-1	0.632235	-0.199122	41	neutral
CD44	0.629268	-0.201165	40	neutral
MUC16	0.627399	-0.202456	39	neutral
BPNT1	0.626966	-0.202756	38	neutral
TKT	0.624132	-0.204723	37	neutral
IGKV3D-15	0.623561	-0.205121	36	neutral
DKK4	0.616025	-0.210402	35	neutral
LCN1	0.612327	-0.213017	34	neutral
IGKV2-40	0.611692	-0.213467	33	neutral
MFGE8	0.608873	-0.215473	32	neutral
TPM3	0.601894	-0.22048	31	neutral
AQP5	0.601863	-0.220502	30	neutral
IGHV1-2	0.599477	-0.222228	29	neutral
MYH9	0.599247	-0.222394	28	neutral
FGA	0.598453	-0.22297	27	neutral
LCN2	0.597891	-0.223378	26	neutral
CST1	0.583726	-0.233791	25	neutral
IGHG1	0.577957	-0.238105	24	neutral
TBCA	0.57022	-0.243958	23	neutral
Ig-like domain-containing protein (Fragment)	0.565465	-0.247594	21	neutral
Ig-like domain-containing protein (Fragment)	0.565465	-0.247594	22	neutral
TTR	0.562415	-0.249943	20	neutral
ORM1	0.543866	-0.264508	19	neutral
GALNT5	0.539623	-0.26791	18	neutral
KRT4	0.527223	-0.278006	17	neutral
SERPINC1	0.525771	-0.279204	16	Validated protein signature
IGKV2D-28	0.500876	-0.30027	15	neutral
AMY1A	0.496849	-0.303775	14	neutral
MSN	0.490853	-0.309048	13	neutral
STAT1	0.470623	-0.327327	12	neutral
ALDH16A1	0.467656	-0.330073	11	Validated protein signature
NSFL1C	0.45205	-0.344814	10	Top 10 least abundant
ORM2	0.441064	-0.355498	9	Top 10 least abundant
LAMP2	0.439614	-0.356928	8	Top 10 least abundant
HP	0.428265	-0.368287	7	Top 10 least abundant
DYNC1H1	0.352019	-0.453434	6	Top 10 least abundant
PRTN3	0.343373	-0.464234	5	Top 10 least abundant
EIF2S2	0.339288	-0.469432	4	Top 10 least abundant
CEACAM5	0.293969	-0.531699	3	Top 10 least abundant
MPO	0.143414	-0.843408	2	Top 10 least abundant
DEFA1;DEFA3	0.138695	-0.857941	1	Top 10 least abundant

## Sheet: Sheet 1
Protein abbreviation	Protein full name	Abundance_CTRL	Log10_Abundance_CTRL	Rank_CTRL	Abundance_ALS	Log10_Abundance_ALS	Rank_ALS	Abundance Mean ALS/Mean CTRL	Log10_overall Abundance	Rank_overall	Label for overall abundance
LTF	Lactotransferrin	87192.2	4.94048	876	57759.3	4.76162	876	0.662436	-0.178856	54	neutral
LYZ	Lysozyme C	59558.7	4.77495	875	52734.4	4.72209	875	0.885418	-0.0528517	307	neutral
LCN1	Lipocalin-1	50591.1	4.70407	874	30978.3	4.49106	874	0.612327	-0.213017	34	neutral
IGHA2	Immunoglobulin heavy constant alpha 2 (Fragment)	27717	4.44275	873	22426.4	4.35076	873	0.809119	-0.0919874	201	neutral
IGHA1	Immunoglobulin heavy constant alpha 1	24952.5	4.39711	872	19283.6	4.28519	871	0.772812	-0.111926	161	neutral
ALB	Serum albumin	20886.3	4.31986	871	19538.6	4.29089	872	0.935473	-0.0289685	423	neutral
PRR4	Proline-rich protein 4	20792.1	4.3179	870	15034.5	4.17709	870	0.723086	-0.14081	110	neutral
PIP	Prolactin-inducible protein	19090.8	4.28082	869	12747.2	4.10542	869	0.667715	-0.175409	61	neutral
PIGR	Polymeric immunoglobulin receptor	14828.3	4.17109	868	10945.3	4.03923	868	0.738134	-0.131865	131	neutral
IGKC	Immunoglobulin kappa constant	11864.9	4.07427	867	7966.36	3.90126	866	0.67142	-0.173006	66	neutral
IGLC2;IGLC3	Immunoglobulin lambda constant 2;Immunoglobulin lambda constant 3	11049.8	4.04335	866	8050.86	3.90584	867	0.728601	-0.13751	119	neutral
DEFA1;DEFA3	Neutrophil defensin 1;Neutrophil defensin 3	10354.8	4.01514	865	1436.15	3.1572	843	0.138695	-0.857941	1	Top 10 least abundant
LACRT	Extracellular glycoprotein lacritin	7852.34	3.895	864	5694.05	3.75542	864	0.725141	-0.139577	112	neutral
LACRT	Extracellular glycoprotein lacritin (Fragment)	7852.34	3.895	863	5694.05	3.75542	864	0.725141	-0.139577	112	neutral
CST4	Cystatin-S	5063.17	3.70442	862	3724.4	3.57106	860	0.735586	-0.133367	126	neutral
JCHAIN	Immunoglobulin J chain	4931.28	3.69296	861	3491.9	3.54306	859	0.708112	-0.149898	99	neutral
SCGB2A1	Mammaglobin-B	4860.67	3.6867	860	3956.66	3.59733	861	0.814016	-0.0893673	205	neutral
IGLL5	Immunoglobulin lambda-like polypeptide 5	4628.1	3.6654	859	3991.49	3.60113	862	0.862446	-0.0642679	267	neutral
SCGB1D1	Secretoglobin family 1D member 1	4242.95	3.62767	858	3209.69	3.50646	857	0.756477	-0.121204	145	neutral
KRT1	Keratin, type II cytoskeletal 1	3952.97	3.59692	857	7649.59	3.88364	865	1.93515	0.286714	858	neutral
IGKV3-7	Probable non-functional immunoglobulin kappa variable 3-7	3828.22	3.583	856	2476.51	3.39384	855	0.646909	-0.189157	45	neutral
IGHV3-74	Immunoglobulin heavy variable 3-74	2939.76	3.46831	855	2260.28	3.35416	854	0.768866	-0.11415	157	neutral
ENO2	Gamma-enolase;Gamma-enolase;Isoform 2 of Gamma-enolase	2893.88	3.46148	854	2734.76	3.43692	856	0.945016	-0.0245609	441	neutral
IGKV3-20	Immunoglobulin kappa variable 3-20	2849.11	3.45471	853	2064.16	3.31474	851	0.724494	-0.139965	111	neutral
IGHG1	Immunoglobulin heavy constant gamma 1 (Fragment);Immunoglobulin heavy constant gamma 1	2796.64	3.44664	852	1616.34	3.20853	847	0.577957	-0.238105	24	neutral
IGKV3D-11;IGKV3-11	Immunoglobulin kappa variable 3D-11;Immunoglobulin kappa variable 3-11	2779.52	3.44397	851	1817.52	3.25948	850	0.653897	-0.184491	49	neutral		Legend
AZGP1	Zinc-alpha-2-glycoprotein	2387.92	3.37802	850	1606.12	3.20578	846	0.672601	-0.172242	69	neutral			Top 6 most abundant proteins in TF
OPRPN	Opiorphin prepropeptide	2231.98	3.34869	849	2175.89	3.33764	853	0.974866	-0.011055	515	neutral			Validated TF protein signature
PLA2G2A	Phospholipase A(2);Phospholipase A2, membrane associated	2006.68	3.30248	848	1589.84	3.20135	845	0.792276	-0.101124	184	neutral
ZG16B	Zymogen granule protein 16 homolog B	1907.06	3.28036	847	1741.15	3.24084	848	0.913002	-0.0395282	368	neutral
IGHV3OR16-9	Immunoglobulin heavy variable 3/OR16-9 (non-functional) (Fragment)	1901.46	3.27909	846	1400.11	3.14616	842	0.736336	-0.132924	128	neutral			Top 10 most abundant
ACTB	Actin, cytoplasmic 1	1855.13	3.26837	845	2101.19	3.32247	852	1.13264	0.054092	796	neutral			Top 10 least abundant
IGHG2	Immunoglobulin heavy constant gamma 2 (Fragment);Immunoglobulin heavy constant gamma 2	1768.56	3.24762	844	1538.03	3.18696	844	0.869651	-0.0606548	277	neutral			Validated TF protein signature
HSPB1	Heat shock protein beta-1	1698.56	3.23008	843	1757.3	3.24485	849	1.03458	0.0147646	670	neutral
IGKV2-40	Immunoglobulin kappa variable 2-40	1666.46	3.2218	842	1019.36	3.00833	831	0.611692	-0.213467	33	neutral
EIF2S2	Eukaryotic translation initiation factor 2 subunit 2	1559.01	3.19285	841	528.955	2.72342	796	0.339288	-0.469432	4	Top 10 least abundant
IGHV1-69	Immunoglobulin heavy variable 1-69	1522.69	3.18261	840	1249.77	3.09683	840	0.820767	-0.0857803	216	neutral
TF	Serotransferrin	1437.14	3.1575	839	1106.86	3.04409	834	0.770182	-0.113407	159	neutral
HP	Haptoglobin	1327.81	3.12314	838	568.656	2.75485	800	0.428265	-0.368287	7	Top 10 least abundant
LCN2	Neutrophil gelatinase-associated lipocalin	1302.43	3.11475	837	778.711	2.89138	820	0.597891	-0.223378	26	neutral
DMBT1	Deleted in malignant brain tumors 1 protein;Deleted in malignant brain tumors 1 protein;Isoform 3 of Deleted in malignant brain tumors 1 protein;Isoform 5 of Deleted in malignant brain tumors 1 protein;Isoform 6 of Deleted in malignant brain tumors 1 protein;Isoform 7 of Deleted in malignant brain tumors 1 protein	1300.67	3.11417	836	985.17	2.99351	830	0.757436	-0.120654	146	neutral
IGKV3D-20	Immunoglobulin kappa variable 3D-20	1240.92	3.09374	835	984.682	2.9933	829	0.793511	-0.100447	186	neutral
KRT10	Keratin, type I cytoskeletal 10	1240.65	3.09365	834	3440.24	3.53659	858	2.77294	0.442941	871	Top 10 most abundant
IGHV3OR16-12	Immunoglobulin heavy variable 3/OR16-12 (non-functional) (Fragment)	1213.91	3.08419	833	932.885	2.96983	825	0.768494	-0.114359	156	neutral
CLU	Clusterin;Isoform 2 of Clusterin;Isoform 4 of Clusterin;Isoform 5 of Clusterin;Isoform 6 of Clusterin	1187.05	3.07447	832	850.039	2.92944	823	0.716092	-0.145031	104	neutral
IGHV3-72	Immunoglobulin heavy variable 3-72	1186.42	3.07424	831	933.85	2.97028	826	0.787117	-0.103961	181	neutral
CST2	Cystatin-SA	1118.02	3.04845	830	1119.58	3.04905	838	1.00139	0.000605166	586	neutral
IGLV1-47	Immunoglobulin lambda variable 1-47	1056.54	3.02389	829	784.857	2.89479	821	0.742855	-0.129096	134	neutral
IGKV1D-33	Immunoglobulin kappa variable 1-33	1044.16	3.01877	828	776.637	2.89022	819	0.743789	-0.12855	136	neutral
SLPI	Antileukoproteinase	1040.15	3.0171	827	703.008	2.84696	812	0.675869	-0.170137	72	neutral
IGHM	Immunoglobulin heavy constant mu	1005.07	3.0022	826	943.031	2.97453	827	0.938276	-0.0276696	430	neutral
IGHV4-34	Immunoglobulin heavy variable 4-34	997.71	2.999	825	715.484	2.8546	815	0.717126	-0.144404	105	neutral
Ig-like domain-containing protein (Fragment)	Ig-like domain-containing protein (Fragment)	987.26	2.99443	824	558.261	2.74684	799	0.565465	-0.247594	21	neutral
Ig-like domain-containing protein (Fragment)	Ig-like domain-containing protein (Fragment)	987.26	2.99443	823	558.261	2.74684	799	0.565465	-0.247594	21	neutral
ENO1	Alpha-enolase	967.102	2.98547	822	1110.94	3.04569	837	1.14873	0.0602191	802	neutral
GSTP1	Glutathione S-transferase P	955.805	2.98037	821	958.796	2.98173	828	1.00313	0.00135682	594	neutral
ANXA1	Annexin A1	945.56	2.97569	820	1110.56	3.04554	836	1.1745	0.0698535	815	neutral
S100A4	Protein S100-A4	925.364	2.96631	819	735.459	2.86656	816	0.794779	-0.0997537	188	neutral
S100A8	Protein S100-A8	923.915	2.96563	818	706.823	2.84931	814	0.76503	-0.116322	153	neutral
CST1	Cystatin-SN	888.208	2.94851	817	518.47	2.71472	794	0.583726	-0.233791	25	neutral
IGHV3-7	Immunoglobulin heavy variable 3-7	872.023	2.94053	816	589.265	2.77031	803	0.675746	-0.170217	71	neutral
C3	Complement C3	867.947	2.93849	815	650.174	2.81303	810	0.749094	-0.125464	139	neutral
SERPINA1	Alpha-1-antitrypsin	844.03	2.92636	814	767.992	2.88536	818	0.909911	-0.0410011	364	neutral
MPO	Myeloperoxidase;Isoform H14 of Myeloperoxidase;Isoform H7 of Myeloperoxidase	821.152	2.91442	813	117.765	2.07102	637	0.143414	-0.843408	2	Top 10 least abundant
ALDH1A1	Retinal dehydrogenase 1	819.797	2.91371	812	915.452	2.96164	824	1.11668	0.0479291	786	neutral
KRT9	Keratin, type I cytoskeletal 9	817.164	2.91231	811	1063.42	3.0267	832	1.30135	0.114394	843	neutral
PRDX1	Peroxiredoxin-1	799.178	2.90264	810	813.007	2.91009	822	1.0173	0.00745065	629	neutral
S100A9	Protein S100-A9	794.216	2.89994	809	624.42	2.79548	808	0.78621	-0.104462	178	neutral
PKM	Pyruvate kinase PKM	720.846	2.85784	808	756.588	2.87886	817	1.04958	0.0210173	703	neutral
IGHV6-1	Immunoglobulin heavy variable 6-1	703.161	2.84705	807	491.076	2.69115	791	0.698383	-0.155906	88	neutral
EEF1A1;EEF1A1P5	Elongation factor 1-alpha 1;Putative elongation factor 1-alpha-like 3	679.589	2.83225	806	706.242	2.84895	813	1.03922	0.0167069	681	neutral
ACTC1;ACTA1	Actin, alpha cardiac muscle 1;Actin, alpha skeletal muscle	666.058	2.82351	805	679.481	2.83218	811	1.02015	0.00866514	643	neutral
HPX	Hemopexin	641.997	2.80753	804	579.679	2.76319	801	0.90293	-0.0443458	353	neutral
PPIA	Peptidyl-prolyl cis-trans isomerase A	639.461	2.80581	803	592.104	2.7724	804	0.925943	-0.033416	403	neutral
IGHV1-2	Immunoglobulin heavy variable 1-2	625.659	2.79634	802	375.068	2.57411	777	0.599477	-0.222228	29	neutral
LDHA	L-lactate dehydrogenase A chain	622.073	2.79384	801	604.274	2.78123	805	0.971389	-0.012607	502	neutral
KRT2	Keratin, type II cytoskeletal 2 epidermal	589.824	2.77072	800	1192.7	3.07653	839	2.02213	0.305809	861	neutral
YWHAZ	14-3-3 protein zeta/delta	585.343	2.76741	799	615.645	2.78933	806	1.05177	0.0219203	711	neutral
KRT6A	Keratin, type II cytoskeletal 6A	579.56	2.7631	798	1311.49	3.11777	841	2.26291	0.354666	866	neutral
ALDH3A1	Aldehyde dehydrogenase, dimeric NADP-preferring	578.873	2.76258	797	496.834	2.69621	792	0.858278	-0.0663718	263	neutral
PRDX5	Peroxiredoxin-5, mitochondrial;Isoform Cytoplasmic+peroxisomal of Peroxiredoxin-5, mitochondrial	572.318	2.75764	796	543.101	2.73488	797	0.94895	-0.0227565	456	neutral
FABP5	Fatty acid-binding protein 5	563.953	2.75124	795	587.928	2.76932	802	1.04251	0.0180815	690	neutral
TXN	Thioredoxin	553.844	2.74339	794	448.741	2.652	785	0.810231	-0.0913911	203	neutral
CST3	Cystatin-C	552.987	2.74272	793	364.855	2.56212	774	0.659788	-0.180595	51	neutral
IGHV1OR15-1	Immunoglobulin heavy variable 1/OR15-1 (non-functional) (Fragment)	539.734	2.73218	792	341.238	2.53306	770	0.632235	-0.199122	41	neutral
SERPINB1	Leukocyte elastase inhibitor	538.381	2.73109	791	620.813	2.79296	807	1.15311	0.0618714	804	neutral
SERPINA3	Alpha-1-antichymotrypsin	527.935	2.72258	790	383.152	2.58337	778	0.725757	-0.139209	114	neutral
TGM2	Protein-glutamine gamma-glutamyltransferase 2	519.968	2.71598	789	471.035	2.67305	789	0.905893	-0.0429232	357	neutral
IGKV2D-24;IGKV2-24	Probable non-functional immunoglobulin kappa variable 2D-24;Immunoglobulin kappa variable 2-24	513.873	2.71086	788	339.62	2.53099	769	0.660904	-0.179862	52	neutral
hCG_2039566;;H2AC4;H2AC11;H2AC7;HIST2H2AC;HIST2H2AA3;HIST3H2A;HIST1H2AC;HIST1H2AH;H2AC14;H2AFJ	Histone H2A;Histone H2A;Histone H2A type 1-B/E;Histone H2A type 1;Histone H2A type 1-D;Histone H2A type 2-C;Histone H2A type 2-A;Histone H2A type 3;Histone H2A type 1-C;Histone H2A type 1-H;Histone H2A type 1-J;Histone H2A.J	505.454	2.70368	787	430.187	2.63366	783	0.851089	-0.0700248	252	neutral
GAPDH	Glyceraldehyde-3-phosphate dehydrogenase	502.298	2.70096	786	508.352	2.70616	793	1.01205	0.00520309	615	neutral
IGKV1-5	Immunoglobulin kappa variable 1-5	479.628	2.6809	785	401.749	2.60396	781	0.837627	-0.0769492	237	neutral
IGLV7-43	Immunoglobulin lambda variable 7-43	474.739	2.67645	784	372.227	2.57081	776	0.784068	-0.105647	175	neutral
PRDX6	Peroxiredoxin-6	472.812	2.67469	783	455.568	2.65855	788	0.963529	-0.0161352	485	neutral
S100A6	Protein S100-A6;Protein S100 (Fragment)	467.046	2.66936	782	523.645	2.71904	795	1.12118	0.0496773	790	neutral
IGHV2-70D;IGHV2-70	Immunoglobulin heavy variable 2-70D;Immunoglobulin heavy variable 2-70 (Fragment)	465.407	2.66783	781	396.396	2.59813	780	0.85172	-0.0697033	253	neutral
KRT17	Keratin, type I cytoskeletal 17	461.946	2.66459	780	1086.69	3.03611	833	2.35242	0.371514	867	Top 10 most abundant
IGHV3-35	Probable non-functional immunoglobulin heavy variable 3-35	455.182	2.65818	779	371.158	2.56956	775	0.815406	-0.0886263	207	neutral
SELENBP1	Methanethiol oxidase;Isoform 4 of Methanethiol oxidase	453.929	2.65699	778	442.57	2.64598	784	0.974976	-0.011006	517	neutral
IGHV3-49	Immunoglobulin heavy variable 3-49	435.877	2.63936	777	326.592	2.51401	764	0.749275	-0.125359	140	neutral
LGALS3BP	Galectin-3-binding protein	433.244	2.63673	776	300.075	2.47723	754	0.692625	-0.159502	83	neutral
GSN	Gelsolin (Isoform 2)	425.088	2.62848	775	449.545	2.65277	787	1.05753	0.0242938	725	neutral
GSN	Gelsolin	425.088	2.62848	774	449.545	2.65277	787	1.05753	0.0242938	725	neutral
ANXA2	Annexin A2	421.282	2.62457	773	473.897	2.67568	790	1.12489	0.0511112	794	neutral
MSLN	Isoform 3 of Mesothelin;Isoform 2 of Mesothelin;Isoform 4 of Mesothelin	411.759	2.61464	772	278.683	2.44511	750	0.67681	-0.169533	74	neutral
SFRP1	Secreted frizzled-related protein 1	409.341	2.61209	771	333.843	2.52354	767	0.815563	-0.0885424	208	neutral
HSPA1B;HSPA1A;HSPA1B	Heat shock 70 kDa protein 1B;Heat shock 70 kDa protein 1A;Heat shock 70 kDa protein 1B	406.226	2.60877	770	403.916	2.60629	782	0.994312	-0.00247721	569	neutral
IGHV3-64D	Immunoglobulin heavy variable 3-64D	404.865	2.60731	769	285.463	2.45555	753	0.705083	-0.15176	96	neutral
LPO	Lactoperoxidase	400.18	2.60226	768	362.203	2.55895	773	0.9051	-0.0433035	356	neutral
KRT13	Keratin, type I cytoskeletal 13	394.69	2.59626	767	1109.57	3.04515	835	2.81124	0.448898	872	Top 10 most abundant
IGLV3-21	Immunoglobulin lambda variable 3-21	393.117	2.59452	766	262.758	2.41956	743	0.668396	-0.174966	62	neutral
B2M	Beta-2-microglobulin	388.334	2.58921	765	278.577	2.44495	749	0.717365	-0.14426	106	neutral
IGHV5-51	Immunoglobulin heavy variable 5-51	387.231	2.58797	764	304.007	2.48288	756	0.785078	-0.105087	177	neutral
GLOD4	Glyoxalase domain-containing protein 4;Isoform 2 of Glyoxalase domain-containing protein 4	385.42	2.58593	763	391.327	2.59254	779	1.01533	0.00660513	623	neutral
IGHV5-10-1	Immunoglobulin heavy variable 5-10-1	381.235	2.58119	762	357.457	2.55322	771	0.937628	-0.0279693	428	neutral
PGD	6-phosphogluconate dehydrogenase, decarboxylating;Isoform 2 of 6-phosphogluconate dehydrogenase, decarboxylating	378.834	2.57845	761	333.293	2.52283	766	0.879787	-0.0556225	297	neutral
CP	Ceruloplasmin	376.96	2.57629	760	250.304	2.39847	739	0.664006	-0.177828	56	neutral
SERPINB8	Serpin B8	368.884	2.56689	759	327.529	2.51525	765	0.887892	-0.0516399	314	neutral
BNC2	Zinc finger protein basonuclin-2 (Fragment);Zinc finger protein basonuclin-2;Zinc finger protein basonuclin-2;Zinc finger protein basonuclin-2 (Fragment);Basonuclin 2 (Fragment);Zinc finger protein basonuclin-2;Isoform 2 of Zinc finger protein basonuclin-2	366.752	2.56437	758	361.835	2.55851	772	0.986594	-0.00586168	547	neutral
PLTP	Phospholipid transfer protein	363.167	2.56011	757	274.582	2.43867	747	0.756078	-0.121434	144	neutral
AQP5	Aquaporin-5	360.063	2.55638	756	216.708	2.33588	719	0.601863	-0.220502	30	neutral
PRTN3	Myeloblastin	357.65	2.55346	755	122.807	2.08922	642	0.343373	-0.464234	5	Top 10 least abundant
IGKV3D-15	Immunoglobulin kappa variable 3D-15	351.774	2.54626	754	219.353	2.34114	721	0.623561	-0.205121	36	neutral
IGLV1-40	Immunoglobulin lambda variable 1-40	348.014	2.5416	753	317.811	2.50217	762	0.913214	-0.0394274	369	neutral
TCN1	Transcobalamin-1	346.938	2.54025	752	237.458	2.37559	728	0.684441	-0.164664	77	neutral
CALM1;CALM2;CALM3	Calmodulin-1;Calmodulin-2;Calmodulin-3	342.501	2.53466	751	250.761	2.39926	740	0.732146	-0.135402	122	neutral
IGLV2-8	Immunoglobulin lambda variable 2-8	326.724	2.51418	750	262.339	2.41886	742	0.80294	-0.0953169	196	neutral
TPI1	Triosephosphate isomerase;Isoform 2 of Triosephosphate isomerase	324.694	2.51147	749	334.154	2.52395	768	1.02913	0.0124723	662	neutral
CFL1	Cofilin-1	323.184	2.50945	748	301.808	2.47973	755	0.933859	-0.0297187	419	neutral
LYPD2	Ly6/PLAUR domain-containing protein 2	320.207	2.50543	747	238.125	2.3768	729	0.743659	-0.128626	135	neutral
APOA1	Apolipoprotein A-I	318.921	2.50368	746	305.224	2.48462	758	0.957053	-0.0190641	472	neutral
KRT16	Keratin, type I cytoskeletal 16	310.285	2.49176	745	634.322	2.80231	809	2.04432	0.310548	862	neutral
PFN1	Profilin-1	307.514	2.48787	744	267.804	2.42782	744	0.870868	-0.0600479	279	neutral
TALDO1	Transaldolase	307.005	2.48715	743	307	2.48714	759	0.999985	-6.51182e-06	581	neutral
ALDH16A1	Aldehyde dehydrogenase family 16 member A1	297.759	2.47387	742	139.249	2.14379	665	0.467656	-0.330073	11	Validated protein signature
ALDOA	Fructose-bisphosphate aldolase;Fructose-bisphosphate aldolase A	283.526	2.45259	741	317.787	2.50214	761	1.12084	0.0495434	789	neutral
DYNC1H1	Cytoplasmic dynein 1 heavy chain 1	281.145	2.44893	740	98.9683	1.9955	602	0.352019	-0.453434	6	Top 10 least abundant
RDX	Radixin;Radixin;Isoform 5 of Radixin	278.751	2.44522	739	242.42	2.38457	733	0.869663	-0.0606491	278	neutral
HSPA8	Heat shock cognate 71 kDa protein	278.508	2.44484	738	317.187	2.50132	760	1.13888	0.0564782	797	neutral
ACTG1	Actin, cytoplasmic 2	276.679	2.44198	737	275.044	2.4394	748	0.994091	-0.00257372	567	neutral
H4C1	Histone H4	276.553	2.44178	736	284.269	2.45373	752	1.0279	0.0119504	661	neutral
TUBA1B	Tubulin alpha-1B chain	274.699	2.43886	735	268.531	2.429	745	0.977547	-0.00986251	525	neutral
IGLV3-10	Immunoglobulin lambda variable 3-10	274.671	2.43881	734	220.639	2.34368	722	0.803285	-0.0951305	197	neutral
CTSB	Cathepsin B	269.745	2.43095	733	209.461	2.3211	717	0.776514	-0.10985	164	neutral
IGHV3-43D	Immunoglobulin heavy variable 3-43D	266.583	2.42583	732	212.241	2.32683	718	0.796156	-0.0990019	190	neutral
HSPG2	Basement membrane-specific heparan sulfate proteoglycan core protein	266.409	2.42555	731	241.36	2.38267	731	0.905976	-0.0428832	358	neutral
IGHV4-28	Immunoglobulin heavy variable 4-28	263.374	2.42057	730	244.273	2.38787	735	0.927473	-0.0326986	407	neutral
IGKV2D-28	Immunoglobulin kappa variable 2D-28	262.271	2.41875	729	131.365	2.11848	650	0.500876	-0.30027	15	neutral
ORM1	Alpha-1-acid glycoprotein 1	258.672	2.41275	728	140.683	2.14824	667	0.543866	-0.264508	19	neutral
ORM2	Alpha-1-acid glycoprotein 2	252.228	2.40179	727	111.249	2.04629	624	0.441064	-0.355498	9	Top 10 least abundant
PEBP1	Phosphatidylethanolamine-binding protein 1	250.923	2.39954	726	245.017	2.3892	736	0.976463	-0.010344	523	neutral
CAPN1	Calpain-1 catalytic subunit	249.51	2.39709	725	243.677	2.38681	734	0.976622	-0.0102733	524	neutral
IGLV1-51	Immunoglobulin lambda variable 1-51	249.335	2.39678	724	240.701	2.38148	730	0.965371	-0.0153058	488	neutral
APOD	Apolipoprotein D (Fragment);Apolipoprotein D	243.812	2.38706	723	224.822	2.35184	724	0.922113	-0.0352158	395	neutral
PTMA	Prothymosin alpha;Prothymosin alpha;Isoform 2 of Prothymosin alpha	243.713	2.38688	722	269.839	2.4311	746	1.1072	0.044226	778	neutral
MDH1	Malate dehydrogenase, cytoplasmic;Isoform 3 of Malate dehydrogenase, cytoplasmic	243.556	2.3866	721	246.45	2.39173	737	1.01188	0.00512923	614	neutral
APOBEC3A	DNA dC->dU-editing enzyme APOBEC-3A	239.035	2.37846	720	203.388	2.30833	714	0.850871	-0.0701361	250	neutral
CMPK1	UMP-CMP kinase;Isoform 3 of UMP-CMP kinase	237.598	2.37584	719	218.792	2.34003	720	0.920848	-0.035812	389	neutral
CLIC1	Chloride intracellular channel protein 1	237.25	2.37521	718	223.631	2.34953	723	0.942594	-0.0256753	436	neutral
IGKV1-8	Immunoglobulin kappa variable 1-8	235.672	2.37231	717	168.639	2.22696	695	0.715566	-0.14535	103	neutral
IGHV3-43	Immunoglobulin heavy variable 3-43	227.255	2.35651	716	225.369	2.35289	725	0.991702	-0.00361895	557	neutral
IGHV3OR15-7	Immunoglobulin heavy variable 3/OR15-7 (pseudogene) (Fragment)	226.274	2.35464	715	153.024	2.18476	688	0.676275	-0.169877	73	neutral
TUBB	Tubulin beta chain	219.444	2.34132	714	196.309	2.29294	711	0.894575	-0.0483831	332	neutral
IGHV3-38	Probable non-functional immunoglobulin heavy variable 3-38	214.793	2.33202	713	148.8	2.1726	681	0.692763	-0.159416	84	neutral
IGLV8-61	Immunoglobulin lambda variable 8-61	214.661	2.33175	712	191.722	2.28267	708	0.893138	-0.0490816	327	neutral
IGKV4-1	Immunoglobulin kappa variable 4-1	213.881	2.33017	711	137.179	2.13729	660	0.641378	-0.192886	44	neutral
RNASE4	Ribonuclease 4	211.781	2.32589	710	142.816	2.15478	670	0.674359	-0.171109	70	neutral
RPS27A	Ubiquitin-40S ribosomal protein S27a	211.454	2.32522	709	171.799	2.23502	699	0.812466	-0.0901949	204	neutral
MSN	Moesin	209.802	2.32181	708	102.982	2.01276	607	0.490853	-0.309048	13	neutral
CTSD	Cathepsin D	206.841	2.31564	707	261.033	2.4167	741	1.262	0.10106	842	neutral
TIMP1	Metalloproteinase inhibitor 1	206.568	2.31506	706	135.792	2.13288	655	0.657374	-0.182187	50	neutral
TUBB4B	Tubulin beta-4B chain	204.899	2.31154	705	209.307	2.32078	716	1.02151	0.00924358	648	neutral
ASS1	Argininosuccinate synthase	202.346	2.30609	704	205.997	2.31386	715	1.01805	0.00776738	631	neutral
RARRES1	Retinoic acid receptor responder protein 1;Isoform 1 of Retinoic acid receptor responder protein 1	199.802	2.3006	703	137.238	2.13747	661	0.686868	-0.163127	80	neutral
A2M	Alpha-2-macroglobulin	197.836	2.29631	702	132.534	2.12233	652	0.66992	-0.173977	65	neutral
ANXA5	Annexin A5	196.838	2.29411	701	199.619	2.3002	712	1.01413	0.00609392	620	neutral
CNDP2	Cytosolic non-specific dipeptidase	196.126	2.29254	700	195.825	2.29187	710	0.998462	-0.000668418	577	neutral
NSFL1C	NSFL1 cofactor p47;Isoform 3 of NSFL1 cofactor p47;Isoform 4 of NSFL1 cofactor p47	195.911	2.29206	699	88.5614	1.94724	574	0.45205	-0.344814	10	Top 10 least abundant
H2BC12;H2BFS;HIST1H2BD;H2BC4;HIST2H2BF;HIST2H2BF;HIST1H2BH;H2BC15;H2BC14;H2BC13;H2BC15	Histone H2B type 1-K;Histone H2B type F-S;Histone H2B type 1-D;Histone H2B type 1-C/E/F/G/I;Histone H2B type 2-F;Isoform 2 of Histone H2B type 2-F;Histone H2B type 1-H;Histone H2B type 1-N;Histone H2B type 1-M;Histone H2B type 1-L;Histone H2B	194.263	2.28839	698	236.174	2.37323	727	1.21575	0.084843	830	neutral
IGHV3-15	Immunoglobulin heavy variable 3-15	193.286	2.2862	697	135.963	2.13342	656	0.703433	-0.152777	92	neutral
IGLV3-19	Immunoglobulin lambda variable 3-19	192.014	2.28333	696	175.448	2.24415	704	0.913727	-0.0391835	370	neutral
NUCB2	Nucleobindin-2;Isoform 2 of Nucleobindin-2	190.987	2.281	695	137.851	2.13941	663	0.721778	-0.141596	108	neutral
PGK1	Phosphoglycerate kinase 1	190.976	2.28098	694	175.203	2.24354	703	0.917409	-0.0374372	379	neutral
ARF3;ARF1	ADP-ribosylation factor 3;ADP-ribosylation factor 1	189.289	2.27712	693	171.904	2.23529	700	0.908158	-0.0418387	362	neutral
IGLV2-18	Immunoglobulin lambda variable 2-18	188.102	2.27439	692	125.221	2.09768	646	0.665704	-0.176719	58	neutral
H3-3A;H3-3A;H3-3B;H3-3B;H3-3B;H3C1;H3-3A;HIST3H3;HIST2H3A	Histone H3;Histone H3;Histone H3 (Fragment);Histone H3;Histone H3.3 (Fragment);Histone H3.1;Histone H3.3;Histone H3.1t;Histone H3.2	187.635	2.27331	691	190.59	2.2801	707	1.01575	0.00678656	624	neutral
MIF	Macrophage migration inhibitory factor	187.54	2.27309	690	194.131	2.28809	709	1.03514	0.015	674	neutral
PSAP	Prosaposin;Prosaposin;Isoform Sap-mu-6 of Prosaposin;Isoform Sap-mu-9 of Prosaposin	185.632	2.26865	689	136.364	2.1347	659	0.73459	-0.133955	125	neutral
PEBP4	Phosphatidylethanolamine-binding protein 4	185.194	2.26763	688	149.233	2.17386	682	0.805821	-0.0937612	200	neutral
IGKV1-39;IGKV1D-39	Immunoglobulin kappa variable 1-39;Immunoglobulin kappa variable 1D-39	184.415	2.2658	687	150.958	2.17886	684	0.818574	-0.086942	211	neutral
CTNNA1	Catenin alpha-1;Isoform 2 of Catenin alpha-1	183.501	2.26364	686	165.101	2.21775	693	0.899732	-0.0458866	345	neutral
GPI	Glucose-6-phosphate isomerase;Glucose-6-phosphate isomerase;Isoform 2 of Glucose-6-phosphate isomerase	179.464	2.25398	685	144.355	2.15943	672	0.804369	-0.0945449	198	neutral
RHOC	Rho-related GTP-binding protein RhoC;Rho-related GTP-binding protein RhoC (Fragment)	178.392	2.25138	684	131.877	2.12017	651	0.739254	-0.131206	132	neutral
MYL12A;MYL12B;MYL12A	Myosin regulatory light chain 12A;Myosin regulatory light chain 12B;Myosin regulatory light chain 12A	175.031	2.24312	683	182.17	2.26048	706	1.04079	0.0173618	686	neutral
CEACAM5	Carcinoembryonic antigen-related cell adhesion molecule 5;Carcinoembryonic antigen-related cell adhesion molecule 5;Carcinoembryonic antigen-related cell adhesion molecule 5;Isoform 2 of Carcinoembryonic antigen-related cell adhesion molecule 5	174.82	2.24259	682	51.3918	1.71089	398	0.293969	-0.531699	3	Top 10 least abundant
A2ML1	Alpha-2-macroglobulin-like protein 1	174.244	2.24116	681	146.634	2.16623	675	0.841544	-0.0749231	241	neutral
TKT	Transketolase;Isoform 2 of Transketolase	174.115	2.24084	680	108.671	2.03611	620	0.624132	-0.204723	37	neutral
GSR	Glutathione reductase, mitochondrial;Isoform Cytoplasmic of Glutathione reductase, mitochondrial	173.51	2.23933	679	152.175	2.18234	686	0.877036	-0.0569824	291	neutral
AKR1A1	Aldo-keto reductase family 1 member A1	171.081	2.2332	678	165.637	2.21916	694	0.96818	-0.014044	493	neutral
SFN	14-3-3 protein sigma;Isoform 2 of 14-3-3 protein sigma	170.104	2.23071	677	170.899	2.23274	698	1.00467	0.00202392	600	neutral
ADH7	All-trans-retinol dehydrogenase [NAD(+)] ADH7	163.704	2.21406	676	147.306	2.16822	678	0.899828	-0.0458406	346	neutral
ALDH1A3	Aldehyde dehydrogenase family 1 member A3	163.043	2.2123	675	176.763	2.24739	705	1.08414	0.0350871	752	neutral
AGR2	Anterior gradient protein 2 homolog	162.586	2.21108	674	139.138	2.14345	664	0.85578	-0.0676379	260	neutral
GSTO1	Glutathione S-transferase omega-1	161.388	2.20787	673	135.981	2.13348	657	0.842573	-0.0743924	242	neutral
HSP90AA1	Heat shock protein HSP 90-alpha;Isoform 2 of Heat shock protein HSP 90-alpha	161.317	2.20768	672	174.828	2.24261	702	1.08376	0.0349313	750	neutral
KRT3	Keratin, type II cytoskeletal 3	160.74	2.20612	671	201.952	2.30525	713	1.25639	0.099124	840	neutral
CHI3L2	Chitinase-3-like protein 2;Isoform 3 of Chitinase-3-like protein 2	160.419	2.20525	670	111.216	2.04617	623	0.693287	-0.159087	86	neutral
IDH1	Isocitrate dehydrogenase [NADP] cytoplasmic	159.671	2.20323	669	147.658	2.16926	680	0.924768	-0.0339674	401	neutral
EZR	Ezrin	158.391	2.19973	668	160.201	2.20466	690	1.01143	0.00493487	612	neutral
KNG1	Isoform LMW of Kininogen-1	157.245	2.19658	667	130.631	2.11605	649	0.830747	-0.0805312	230	neutral
S100A11	Protein S100-A11	155.588	2.19198	666	172.012	2.23556	701	1.10556	0.0435814	777	neutral
PRDX2	Peroxiredoxin-2	151.395	2.18011	665	169.102	2.22815	697	1.11696	0.0480372	787	neutral
MYH14	Isoform 6 of Myosin-14	151.303	2.17985	664	110.001	2.0414	622	0.727024	-0.138451	117	neutral
LGALS3	Galectin-3	151.113	2.1793	663	164.278	2.21558	692	1.08712	0.0362768	755	neutral
SERPING1	Plasma protease C1 inhibitor;Plasma protease C1 inhibitor;Isoform 2 of Plasma protease C1 inhibitor;Isoform 3 of Plasma protease C1 inhibitor	149.859	2.17568	662	117.377	2.06958	636	0.78325	-0.1061	172	neutral
FGB	Fibrinogen beta chain	149.604	2.17494	661	125.887	2.09998	647	0.841469	-0.0749621	240	neutral
PCBP1	Poly(rC)-binding protein 1	149.379	2.17429	660	134.776	2.12961	654	0.902244	-0.0446762	352	neutral
CRIP1	Cysteine-rich protein 1	148.8	2.1726	659	162.42	2.21064	691	1.09154	0.0380388	764	neutral
A1BG	Alpha-1B-glycoprotein	148.376	2.17136	658	107.126	2.02989	616	0.721989	-0.14147	109	neutral
FGA	Fibrinogen alpha chain;Isoform 2 of Fibrinogen alpha chain	148.32	2.1712	657	88.7623	1.94823	575	0.598453	-0.22297	27	neutral
SERPINB5	Serpin B5	146.792	2.1667	656	145.659	2.16334	673	0.99228	-0.00336585	559	neutral
ACTN1	Alpha-actinin-1;Isoform 2 of Alpha-actinin-1;Isoform 3 of Alpha-actinin-1	146.614	2.16617	655	143.054	2.1555	671	0.97572	-0.0106746	521	neutral
ARPC4-TTLL3;ARPC4	Actin-related protein 2/3 complex subunit 4	145.131	2.16176	654	137.273	2.13758	662	0.945856	-0.0241749	443	neutral
FGG	Fibrinogen gamma chain;Fibrinogen gamma chain;Fibrinogen gamma chain;Isoform Gamma-A of Fibrinogen gamma chain	145.128	2.16175	653	99.5768	1.99816	603	0.686133	-0.163591	79	neutral
IGHV2-26	Immunoglobulin heavy variable 2-26	145.019	2.16143	652	114.986	2.06065	632	0.792902	-0.10078	185	neutral
FBP2	Fructose-1,6-bisphosphatase isozyme 2	144.609	2.16019	651	168.744	2.22723	696	1.1669	0.0670349	811	neutral
IGLL1	Immunoglobulin lambda-like polypeptide 1	142.641	2.15424	650	92.7805	1.96746	589	0.650447	-0.186788	47	neutral
CSTB	Cystatin-B	142.521	2.15388	649	125.126	2.09735	645	0.877949	-0.0565308	292	neutral
KRT5	Keratin, type II cytoskeletal 5	142.513	2.15386	648	279.969	2.44711	751	1.96451	0.293255	859	neutral
EEF2	Elongation factor 2	141.486	2.15071	647	147.344	2.16833	679	1.0414	0.0176174	688	neutral
CAPNS1	Calpain small subunit 1 (Fragment);Calpain small subunit 1;Calpain small subunit 1 (Fragment);Calpain small subunit 1	141.319	2.1502	646	151.808	2.1813	685	1.07422	0.0310948	738	neutral
AHSG	Alpha-2-HS-glycoprotein	140.969	2.14912	645	127.367	2.10506	648	0.903512	-0.0440662	354	neutral
YWHAB	14-3-3 protein beta/alpha	140.426	2.14745	644	146.19	2.16492	674	1.04105	0.0174696	687	neutral
IGHG3	Immunoglobulin heavy constant gamma 3 (Fragment);Immunoglobulin heavy constant gamma 3 (Fragment);Immunoglobulin heavy constant gamma 3	138.687	2.14204	643	152.691	2.18381	687	1.10098	0.0417775	771	neutral
DSTN	Destrin	137.952	2.13973	642	141.712	2.15141	669	1.02726	0.0116785	659	neutral
RAC1	Ras-related C3 botulinum toxin substrate 1;Isoform B of Ras-related C3 botulinum toxin substrate 1	137.656	2.1388	641	133.089	2.12414	653	0.966825	-0.0146522	490	neutral
cDNA FLJ55673, highly similar to Complement factor B	cDNA FLJ55673, highly similar to Complement factor B	133.588	2.12577	640	136.046	2.13369	658	1.0184	0.00791892	632	neutral
NME2;NME1-NME2	Isoform 3 of Nucleoside diphosphate kinase B;Nucleoside diphosphate kinase	133.231	2.12461	639	113.24	2.054	627	0.849949	-0.0706073	248	neutral
PGAM1	Phosphoglycerate mutase 1	130.761	2.11648	638	123.875	2.09299	644	0.947339	-0.0234947	449	neutral
DCD	Dermcidin;Isoform 2 of Dermcidin	128.847	2.11007	637	229.768	2.36129	726	1.78326	0.251215	855	neutral
GDI2	Rab GDP dissociation inhibitor beta	128.217	2.10794	636	123.416	2.09137	643	0.96256	-0.0165721	480	neutral
TPM3	Isoform 2 of Tropomyosin alpha-3 chain	127.262	2.1047	635	76.598	1.88422	536	0.601894	-0.22048	31	neutral
VTN	Vitronectin	127.123	2.10422	634	108.142	2.03399	618	0.850688	-0.0702295	249	neutral
APMAP	Adipocyte plasma membrane-associated protein (Fragment);Adipocyte plasma membrane-associated protein;Isoform 2 of Adipocyte plasma membrane-associated protein	126.91	2.10349	633	113.683	2.0557	629	0.89578	-0.0477987	334	neutral
IGLV9-49	Immunoglobulin lambda variable 9-49	125.685	2.09928	632	92.0768	1.96415	587	0.732597	-0.135135	123	neutral
CDH1	Cadherin-1	125.525	2.09873	631	96.107	1.98275	594	0.765639	-0.115976	154	neutral
PLS3	Plastin-3	125.38	2.09823	630	120.801	2.08207	638	0.963483	-0.0161561	484	neutral
C4B_2;C4B;C4B	Complement C4-B	121.639	2.08507	629	85.3502	1.9312	564	0.70167	-0.153867	90	neutral
LAMP2	Lysosome-associated membrane glycoprotein 2;Isoform LAMP-2B of Lysosome-associated membrane glycoprotein 2;Isoform LAMP-2C of Lysosome-associated membrane glycoprotein 2	120.826	2.08216	628	53.1167	1.72523	412	0.439614	-0.356928	8	Top 10 least abundant
LDHB	L-lactate dehydrogenase B chain	120.127	2.07964	627	90.3422	1.95589	581	0.752054	-0.123751	142	neutral
PSMA4	Proteasome subunit alpha type (Fragment);Proteasome subunit alpha type (Fragment);Proteasome subunit alpha type-4	120.044	2.07934	626	84.5508	1.92712	562	0.70433	-0.152224	94	neutral
TRIM25	E3 ubiquitin/ISG15 ligase TRIM25	119.906	2.07884	625	112.305	2.0504	626	0.936614	-0.0284393	426	neutral
ARHGDIA	Rho GDP-dissociation inhibitor 1 (Fragment);Rho GDP-dissociation inhibitor 1;Rho GDP-dissociation inhibitor 1	119.323	2.07672	624	106.912	2.02903	615	0.895988	-0.0476977	336	neutral
AKR1C1	Aldo-keto reductase family 1 member C1	119.277	2.07656	623	104.746	2.02014	611	0.87817	-0.0564213	293	neutral
CALU	Calumenin;Isoform 3 of Calumenin	119.256	2.07648	622	81.1544	1.90931	549	0.680505	-0.167169	76	neutral
PRSS8	Prostasin	118.86	2.07504	621	83.9471	1.92401	559	0.706269	-0.15103	98	neutral
LAP3	Cytosol aminopeptidase;Isoform 2 of Cytosol aminopeptidase	118.192	2.07259	620	121.956	2.0862	640	1.03185	0.0136162	666	neutral
GSTA1	Glutathione S-transferase A1	118.19	2.07258	619	146.914	2.16706	677	1.24303	0.0944827	837	neutral
PLG	Plasminogen	117.99	2.07185	618	92.7846	1.96748	590	0.786376	-0.10437	179	neutral
QSOX1	Sulfhydryl oxidase 1	117.427	2.06977	617	82.6277	1.91713	551	0.70365	-0.152644	93	neutral
WARS	Tryptophan--tRNA ligase, cytoplasmic	117.398	2.06966	616	248.121	2.39466	738	2.11351	0.325004	864	neutral
RNH1	Ribonuclease inhibitor	116.318	2.06565	615	113.728	2.05587	630	0.977729	-0.00978149	526	neutral
CD55	Complement decay-accelerating factor;Complement decay-accelerating factor (Fragment);Complement decay-accelerating factor;Complement decay-accelerating factor;Isoform 1 of Complement decay-accelerating factor;Isoform 3 of Complement decay-accelerating factor;Isoform 4 of Complement decay-accelerating factor;Isoform 5 of Complement decay-accelerating factor;Isoform 6 of Complement decay-accelerati…	116.27	2.06547	614	87.6147	1.94258	570	0.753548	-0.122889	143	neutral
STAT1	Signal transducer and activator of transcription 1-alpha/beta	115.792	2.06368	613	54.4944	1.73635	424	0.470623	-0.327327	12	neutral
PSME1	Proteasome activator complex subunit 1	114.148	2.05747	612	97.5146	1.98907	599	0.854282	-0.0683985	256	neutral
TAGLN2	Transgelin-2;Isoform 2 of Transgelin-2	113.484	2.05494	611	105.458	2.02308	612	0.929278	-0.0318543	411	neutral
ARHGDIB	Rho GDP-dissociation inhibitor 2 (Fragment);Rho GDP-dissociation inhibitor 2	112.614	2.05159	610	115.183	2.06139	633	1.02281	0.00979604	651	neutral
GC	Vitamin D-binding protein;Vitamin D-binding protein;Isoform 3 of Vitamin D-binding protein	111.966	2.04908	609	116.118	2.0649	635	1.03708	0.0158136	676	neutral
ANXA11	Annexin A11;Isoform 2 of Annexin A11	111.472	2.04717	608	106.247	2.02632	613	0.953125	-0.0208503	463	neutral
HTRA1	Serine protease HTRA1	110.415	2.04303	607	75.6326	1.87871	535	0.684987	-0.164318	78	neutral
PARK7	Protein/nucleic acid deglycase DJ-1	110.205	2.0422	606	103.014	2.01289	608	0.934747	-0.0293061	421	neutral
CFH	Complement factor H	109.764	2.04046	605	86.7621	1.93833	568	0.79044	-0.102131	183	neutral
KRT74;KRT74;KRT73	Keratin, type II cytoskeletal 74;Keratin, type II cytoskeletal 74;Keratin, type II cytoskeletal 73	108.865	2.03689	604	241.562	2.38303	732	2.21891	0.346139	865	neutral
S100P	Protein S100-P	108.541	2.03559	603	91.1971	1.95998	585	0.840209	-0.0756129	239	neutral
RNASET2	Ribonuclease T2;Ribonuclease T2 (Fragment);Ribonuclease T2	107.685	2.03215	602	70.0167	1.8452	514	0.6502	-0.186953	46	neutral
IGHV3-13	Immunoglobulin heavy variable 3-13	107.551	2.03161	601	113.631	2.0555	628	1.05654	0.0238845	722	neutral
PYGB	Glycogen phosphorylase, brain form	107.448	2.0312	600	108.176	2.03413	619	1.00678	0.00293249	604	neutral
IL1RN	Isoform 2 of Interleukin-1 receptor antagonist protein	107.086	2.02973	599	99.6431	1.99845	604	0.930497	-0.031285	412	neutral
PPIB	Peptidyl-prolyl cis-trans isomerase B	107.086	2.02973	598	82.6671	1.91733	552	0.771971	-0.112399	160	neutral
RAN	GTP-binding nuclear protein Ran	105.892	2.02486	597	106.658	2.02799	614	1.00723	0.00312742	605	neutral
GANAB	Neutral alpha-glucosidase AB;Isoform 2 of Neutral alpha-glucosidase AB	105.586	2.02361	596	82.7725	1.91789	553	0.783935	-0.10572	174	neutral
TBCA	Tubulin-specific chaperone A	105.496	2.02324	595	60.1558	1.77928	460	0.57022	-0.243958	23	neutral
GLO1	Lactoylglutathione lyase;Isoform 2 of Lactoylglutathione lyase	105.263	2.02227	594	91.0543	1.9593	583	0.865019	-0.0629742	272	neutral
KRT14	Keratin, type I cytoskeletal 14	105.061	2.02144	593	139.383	2.14421	666	1.32669	0.122768	844	neutral
CBR1	Carbonyl reductase [NADPH] 1	105.032	2.02132	592	93.4945	1.97079	591	0.890151	-0.0505366	321	neutral
YWHAE	14-3-3 protein epsilon	104.419	2.01878	591	109.179	2.03814	621	1.04558	0.0193583	695	neutral
IGHV3-64	Immunoglobulin heavy variable 3-64	104.415	2.01876	590	69.6339	1.84282	509	0.666893	-0.175944	60	neutral
RHOA	Transforming protein RhoA	103.325	2.01421	589	88.2526	1.94573	573	0.854124	-0.068479	255	neutral
PSCA	Prostate stem cell antigen	102.994	2.01281	588	90.6001	1.95713	582	0.879662	-0.0556839	296	neutral
CAPN2	Calpain-2 catalytic subunit	102.409	2.01034	587	96.9014	1.98633	597	0.94622	-0.0240078	445	neutral
CALML3	Calmodulin-like protein 3	102.046	2.00879	586	103.778	2.0161	610	1.01697	0.00730955	628	neutral
MYL6	Myosin light polypeptide 6;Myosin light polypeptide 6;Myosin light polypeptide 6;Myosin light polypeptide 6;Myosin light polypeptide 6;Myosin light polypeptide 6;Isoform Smooth muscle of Myosin light polypeptide 6	101.923	2.00827	585	107.438	2.03116	617	1.05411	0.022884	714	neutral
FBP1	Fructose-1,6-bisphosphatase 1	101.666	2.00717	584	101.279	2.00552	606	0.996197	-0.00165475	573	neutral
HSP90AB1	Heat shock protein HSP 90-beta	101.418	2.00612	583	89.7123	1.95285	578	0.884579	-0.0532631	305	neutral
CD14	Monocyte differentiation antigen CD14	100.81	2.00351	582	82.4404	1.91614	550	0.817777	-0.0873653	210	neutral
EIF4A1	Eukaryotic initiation factor 4A-I	100.072	2.00031	581	90.0362	1.95442	579	0.899715	-0.0458953	344	neutral
PDIA3	Protein disulfide-isomerase A3	99.2308	1.99665	580	121.808	2.08568	639	1.22752	0.0890291	833	neutral
SERPINC1	Antithrombin-III	99.0881	1.99602	579	52.0976	1.71682	402	0.525771	-0.279204	16	Validated protein signature
VCP	Transitional endoplasmic reticulum ATPase	99.0338	1.99578	578	89.0323	1.94955	577	0.899009	-0.046236	343	neutral
RAB11B	Ras-related protein Rab-11B	98.379	1.9929	577	84.1453	1.92503	560	0.855317	-0.0678727	259	neutral
NAMPT	Nicotinamide phosphoribosyltransferase	98.2208	1.9922	576	96.2368	1.98334	596	0.979801	-0.00886203	529	neutral
WDR1	WD repeat-containing protein 1	97.9063	1.99081	575	87.7939	1.94346	571	0.896714	-0.0473462	338	neutral
CD59;;CD59;CD59	CD59 glycoprotein (Fragment);UPAR/Ly6 domain-containing protein;CD59 glycoprotein;Isoform 2 of CD59 glycoprotein	97.8289	1.99047	574	67.6173	1.83006	501	0.691179	-0.160409	82	neutral
DNAJC3	DnaJ homolog subfamily C member 3	97.7753	1.99023	573	81.063	1.90882	547	0.829075	-0.0814064	226	neutral
HSPA1L	Heat shock 70 kDa protein 1-like;HSPA1L (Fragment)	97.4497	1.98878	572	122.359	2.08764	641	1.25561	0.098855	839	neutral
RAP1A	Ras-related protein Rap-1A	97.234	1.98782	571	87.5519	1.94227	569	0.900425	-0.0455525	348	neutral
IGKV6-21	Immunoglobulin kappa variable 6-21	97.1861	1.9876	570	83.2231	1.92024	557	0.856327	-0.0673604	261	neutral
ANXA3	Annexin A3	96.8798	1.98623	569	101.037	2.00448	605	1.04291	0.0182481	691	neutral
IGKV1-17	Immunoglobulin kappa variable 1-17	96.1327	1.98287	568	86.5839	1.93744	566	0.90067	-0.0454344	349	neutral
PTGES3	Prostaglandin E synthase 3;Prostaglandin E synthase 3;Isoform 3 of Prostaglandin E synthase 3;Isoform 4 of Prostaglandin E synthase 3	95.7785	1.98127	567	74.1983	1.87039	528	0.774687	-0.110874	162	neutral
ACTN4	Alpha-actinin-4	95.2406	1.97882	566	97.1393	1.98739	598	1.01994	0.00857282	640	neutral
HRG	Histidine-rich glycoprotein	95.19	1.97859	565	65.6813	1.81744	493	0.690002	-0.16115	81	neutral
AMY1A	Alpha-amylase 1	95.0399	1.97791	564	47.2205	1.67413	369	0.496849	-0.303775	14	neutral
AHCY	Adenosylhomocysteinase	94.3918	1.97493	563	91.7109	1.96242	586	0.971597	-0.0125137	503	neutral
PSMA6	Proteasome subunit alpha type;Proteasome subunit alpha type;Proteasome subunit alpha type-6	94.0102	1.97317	562	94.257	1.97431	592	1.00262	0.00113852	592	neutral
GLUL	Glutamine synthetase	93.9507	1.9729	561	111.452	2.04709	625	1.18628	0.0741862	822	neutral
GRN	Progranulin	92.9511	1.96825	560	61.5536	1.78925	471	0.662215	-0.179001	53	neutral
FLG2	Filaggrin-2	92.2768	1.96509	559	113.935	2.05666	631	1.23471	0.0915635	834	neutral
AMBP	Protein AMBP	91.9577	1.96359	558	70.0905	1.84566	515	0.762204	-0.117929	151	neutral
ADH1C	Alcohol dehydrogenase 1C	91.7967	1.96283	557	80.3516	1.90499	545	0.875322	-0.0578321	287	neutral
ASAH1	Acid ceramidase;Acid ceramidase;Acid ceramidase;Acid ceramidase;Acid ceramidase;Acid ceramidase;Acid ceramidase (Fragment);Acid ceramidase;Acid ceramidase;Acid ceramidase;Isoform 2 of Acid ceramidase	91.6007	1.9619	556	88.8963	1.94888	576	0.970477	-0.0130149	500	neutral
NCCRP1	F-box only protein 50	91.5862	1.96183	555	97.7362	1.99006	601	1.06715	0.0282256	734	neutral
F5	Coagulation factor V	90.9665	1.95888	554	319.937	2.50507	763	3.51709	0.546184	875	Top 10 most abundant
BTD	Biotinidase;Isoform 2 of Biotinidase;Isoform 3 of Biotinidase;Isoform 4 of Biotinidase	90.7323	1.95776	553	69.8614	1.84424	513	0.769972	-0.113525	158	neutral
DKK4	Dickkopf-related protein 4	90.443	1.95637	552	55.7151	1.74597	431	0.616025	-0.210402	35	neutral
APOH	Beta-2-glycoprotein 1	90.3955	1.95615	551	71.2945	1.85306	519	0.788695	-0.103091	182	neutral
APRT	Adenine phosphoribosyltransferase;Isoform 2 of Adenine phosphoribosyltransferase	89.6086	1.95235	550	87.8714	1.94385	572	0.980614	-0.00850205	533	neutral
GPX1	Glutathione peroxidase;Glutathione peroxidase 1	88.6346	1.9476	549	86.1813	1.93541	565	0.972321	-0.0121902	506	neutral
SDC1	Syndecan-1;Syndecan-1 (Fragment);Syndecan-1	88.2521	1.94573	548	84.3217	1.92594	561	0.955464	-0.0197856	468	neutral
PPA1	Inorganic pyrophosphatase	87.8743	1.94386	547	85.0133	1.92949	563	0.967442	-0.0143749	491	neutral
ARPC5	Actin-related protein 2/3 complex subunit 5	87.793	1.94346	546	77.4971	1.88929	538	0.882725	-0.0541744	302	neutral
MYH9	Myosin-9	87.4176	1.9416	545	52.3848	1.7192	405	0.599247	-0.222394	28	neutral
CAPZB	Isoform 2 of F-actin-capping protein subunit beta	87.359	1.94131	544	78.7081	1.89602	540	0.900973	-0.0452884	351	neutral
UBE2D3;UBE2D2;UBE2D3;UBE2D3;UBE2D2;UBE2D3;UBE2D3;UBE2D3;UBE2D3;UBE2D2;UBE2D2	Ubiquitin-conjugating enzyme E2 D3;Ubiquitin-conjugating enzyme E2 D2;Ubiquitin-conjugating enzyme E2 D3;Ubiquitin-conjugating enzyme E2 D3 (Fragment);Ubiquitin-conjugating enzyme E2 D2 (Fragment);Ubiquitin-conjugating enzyme E2 D3;Ubiquitin-conjugating enzyme E2 D3;Isoform 2 of Ubiquitin-conjugating enzyme E2 D3;Isoform 3 of Ubiquitin-conjugating enzyme E2 D3;Ubiquitin-conjugating enzyme E2 D2;I…	86.9407	1.93922	543	94.4321	1.97512	593	1.08617	0.0358961	753	neutral
UBA1	Ubiquitin-like modifier-activating enzyme 1;Isoform 2 of Ubiquitin-like modifier-activating enzyme 1	85.2612	1.93075	542	82.9384	1.91876	555	0.972757	-0.0119958	509	neutral
IGKV1-16	Immunoglobulin kappa variable 1-16	85.1741	1.93031	541	59.0292	1.77107	452	0.693042	-0.159241	85	neutral
DPP3	Dipeptidyl peptidase 3	85.0695	1.92977	540	66.6527	1.82382	495	0.783508	-0.105957	173	neutral
SPARCL1	SPARC-like protein 1;Isoform 2 of SPARC-like protein 1	85.0324	1.92958	539	63.5399	1.80305	480	0.747243	-0.126538	138	neutral
ADGRV1	Adhesion G-protein-coupled receptor V1;Adhesion G-protein-coupled receptor V1 (Fragment);Adhesion G-protein coupled receptor V1;Isoform 2 of Adhesion G-protein coupled receptor V1	84.6635	1.9277	538	53.7251	1.73018	416	0.634572	-0.197519	42	neutral
TUBA4A	Tubulin alpha-4A chain;Isoform 2 of Tubulin alpha-4A chain	84.3403	1.92604	537	97.5505	1.98923	600	1.15663	0.0631945	806	neutral
FMOD	Fibromodulin	84.3274	1.92597	536	58.5359	1.76742	446	0.694151	-0.158546	87	neutral
UGP2	UTP--glucose-1-phosphate uridylyltransferase	83.473	1.92155	535	78.8393	1.89674	541	0.944488	-0.0248034	438	neutral
YWHAG	14-3-3 protein gamma	83.3773	1.92105	534	83.6309	1.92237	558	1.00304	0.00131897	593	neutral
AK1	Adenylate kinase isoenzyme 1	82.8513	1.9183	533	90.3014	1.95569	580	1.08992	0.0373954	763	neutral
IGHV1-18	Immunoglobulin heavy variable 1-18	82.5168	1.91654	532	68.3742	1.83489	505	0.82861	-0.0816501	225	neutral
CAPG	Macrophage-capping protein	82.2245	1.915	531	75.1552	1.87596	534	0.914024	-0.0390424	371	neutral
GSS	Glutathione synthetase	81.9951	1.91379	530	77.471	1.88914	537	0.944825	-0.0246488	439	neutral
CAP1	Adenylyl cyclase-associated protein 1;Isoform 2 of Adenylyl cyclase-associated protein 1	81.5822	1.9116	529	74.7075	1.87336	532	0.915733	-0.0382312	375	neutral
NPEPPS	Aminopeptidase;Puromycin-sensitive aminopeptidase	81.4998	1.91116	528	72.9231	1.86286	525	0.894763	-0.0482917	333	neutral
GMDS	GDP-mannose 4,6 dehydratase;Isoform 2 of GDP-mannose 4,6 dehydratase	81.2381	1.90976	527	80.325	1.90485	544	0.98876	-0.00490911	552	neutral
RNPEP	Aminopeptidase B	80.419	1.90536	526	69.7896	1.84379	512	0.867825	-0.0615676	274	neutral
ANG	Angiogenin	79.6474	1.90117	525	62.1186	1.79322	474	0.77992	-0.10795	168	neutral
TYMP	Thymidine phosphorylase	79.5267	1.90051	524	86.6701	1.93787	567	1.08982	0.0373567	762	neutral
LXN	Latexin	79.4559	1.90013	523	83.2081	1.92017	556	1.04722	0.0200396	698	neutral
BLMH	Bleomycin hydrolase (Fragment);Bleomycin hydrolase (Fragment);Bleomycin hydrolase (Fragment);Bleomycin hydrolase	79.2222	1.89885	522	82.8154	1.91811	554	1.04536	0.0192642	694	neutral
TTR	Transthyretin	78.702	1.89599	521	44.2632	1.64604	343	0.562415	-0.249943	20	neutral
IGKV1D-16	Immunoglobulin kappa variable 1D-16	78.5456	1.89512	520	64.7503	1.81124	488	0.824366	-0.0838799	218	neutral
FUCA1	Tissue alpha-L-fucosidase	78.4555	1.89462	519	69.6612	1.84299	510	0.887907	-0.0516323	315	neutral
MFGE8	Lactadherin	78.3413	1.89399	518	47.6999	1.67852	376	0.608873	-0.215473	32	neutral
ACTR2	Actin-related protein 2	78.1142	1.89273	517	72.3982	1.85973	521	0.926826	-0.0330018	405	neutral
TXNDC17	Thioredoxin domain-containing protein 17	78.0081	1.89214	516	81.1521	1.9093	548	1.0403	0.0171604	684	neutral
PDCD6IP	Programmed cell death 6-interacting protein	77.8425	1.89122	515	115.705	2.06335	634	1.48639	0.172134	850	neutral
RBP4	Retinol-binding protein 4;Retinol-binding protein	77.1438	1.8873	514	64.1664	1.80731	485	0.831777	-0.0799931	231	neutral
PGLS	6-phosphogluconolactonase	76.9763	1.88636	513	78.1961	1.89319	539	1.01585	0.00682806	626	neutral
HSP90B1	Endoplasmin	76.5476	1.88393	512	66.7803	1.82465	496	0.872402	-0.0592832	280	neutral
HEBP2	Heme-binding protein 2	76.3114	1.88259	511	80.1818	1.90408	543	1.05072	0.0214864	709	neutral
LRG1	Leucine-rich alpha-2-glycoprotein	76.2314	1.88213	510	69.4571	1.84172	508	0.911135	-0.040417	366	neutral
PCBP2	Poly(rC)-binding protein 2;Poly(rC)-binding protein 2 (Fragment);Poly(rC)-binding protein 2;Isoform 2 of Poly(rC)-binding protein 2;Isoform 3 of Poly(rC)-binding protein 2;Isoform 4 of Poly(rC)-binding protein 2;Isoform 5 of Poly(rC)-binding protein 2;Isoform 6 of Poly(rC)-binding protein 2;Isoform 7 of Poly(rC)-binding protein 2;Isoform 8 of Poly(rC)-binding protein 2	76.2179	1.88206	509	70.4562	1.84792	516	0.924404	-0.0341382	400	neutral
GALM	Aldose 1-epimerase	76.1019	1.8814	508	74.7877	1.87383	533	0.982732	-0.00756512	537	neutral
CTSL	Cathepsin L1	75.9626	1.8806	507	58.8934	1.77007	449	0.775294	-0.110533	163	neutral
IL18	Interleukin-18;Isoform 2 of Interleukin-18	75.9412	1.88048	506	62.9043	1.79868	477	0.828329	-0.0817971	224	neutral
PSMB8	Proteasome subunit beta type-8;Isoform 2 of Proteasome subunit beta type-8;Proteasome subunit beta	75.8315	1.87985	505	92.4139	1.96574	588	1.21867	0.0858879	831	neutral
IGLV3-27	Immunoglobulin lambda variable 3-27	75.7066	1.87913	504	57.5989	1.76041	441	0.760818	-0.118719	150	neutral
BLVRB	Flavin reductase (NADPH)	75.1268	1.87579	503	74.6367	1.87295	531	0.993476	-0.00284261	562	neutral
XDH	Xanthine dehydrogenase/oxidase	74.6505	1.87303	502	73.6177	1.86698	526	0.986165	-0.0060503	545	neutral
SORD	Sorbitol dehydrogenase	74.1879	1.87033	501	74.2934	1.87095	529	1.00142	0.000617456	587	neutral
GPX3	Glutathione peroxidase;Glutathione peroxidase 3	74.0904	1.86976	500	65.3981	1.81556	491	0.882679	-0.0541974	301	neutral
PLOD1	Procollagen-lysine,2-oxoglutarate 5-dioxygenase 1;Isoform 2 of Procollagen-lysine,2-oxoglutarate 5-dioxygenase 1	73.7188	1.86758	499	55.3787	1.74334	429	0.751216	-0.124235	141	neutral
DIAPH1	Protein diaphanous homolog 1	73.7154	1.86756	498	78.922	1.8972	542	1.07063	0.0296397	735	neutral
ACTR3	Actin-related protein 3	73.0768	1.86378	497	67.2719	1.82783	500	0.920564	-0.0359462	387	neutral
NPC2	NPC intracellular cholesterol transporter 2;NPC intracellular cholesterol transporter 2 (Fragment);NPC intracellular cholesterol transporter 2;NPC intracellular cholesterol transporter 2;NPC intracellular cholesterol transporter 2	72.0832	1.85783	496	61.8752	1.79152	473	0.858386	-0.0663172	264	neutral
BPNT1	3'(2'),5'-bisphosphate nucleotidase 1;Isoform 4 of 3'(2'),5'-bisphosphate nucleotidase 1	71.9466	1.85701	495	45.1081	1.65425	350	0.626966	-0.202756	38	neutral
PTPA	Serine/threonine-protein phosphatase 2A activator;Serine/threonine-protein phosphatase 2A activator;Serine/threonine-protein phosphatase 2A activator;Isoform 1 of Serine/threonine-protein phosphatase 2A activator	71.9148	1.85682	494	67.1053	1.82676	499	0.933122	-0.0300615	414	neutral
UBE2V2	Ubiquitin-conjugating enzyme E2 variant 2	71.6986	1.85551	493	70.7338	1.84963	518	0.986543	-0.00588383	546	neutral
CRYAB	Alpha-crystallin B chain	71.6937	1.85548	492	68.3258	1.83458	504	0.953023	-0.0208964	462	neutral
TMEM189-UBE2V1;UBE2V1;UBE2V1;UBE2V1;UBE2V1	HCG2044781;Ubiquitin-conjugating enzyme E2 variant 1;Isoform 1 of Ubiquitin-conjugating enzyme E2 variant 1;Isoform 2 of Ubiquitin-conjugating enzyme E2 variant 1;Isoform 5 of Ubiquitin-conjugating enzyme E2 variant 1	71.5085	1.85436	491	96.1104	1.98277	595	1.34404	0.128413	845	neutral
ARL3	ADP-ribosylation factor-like protein 3	70.7583	1.84978	490	69.6739	1.84307	511	0.984675	-0.00670711	541	neutral
EIF5A	Eukaryotic translation initiation factor 5A (Fragment);Eukaryotic translation initiation factor 5A-1;Eukaryotic translation initiation factor 5A-1;Isoform 2 of Eukaryotic translation initiation factor 5A-1	70.6973	1.8494	489	61.145	1.78636	468	0.864885	-0.0630418	271	neutral
LHPP	Phospholysine phosphohistidine inorganic pyrophosphate phosphatase;Phospholysine phosphohistidine inorganic pyrophosphate phosphatase;Isoform 2 of Phospholysine phosphohistidine inorganic pyrophosphate phosphatase	70.6168	1.84891	488	47.2136	1.67407	368	0.66859	-0.17484	63	neutral
UBE2L3	Ubiquitin-conjugating enzyme E2 L3;Isoform 2 of Ubiquitin-conjugating enzyme E2 L3;Isoform 3 of Ubiquitin-conjugating enzyme E2 L3	70.453	1.8479	487	64.4532	1.80924	486	0.914839	-0.0386554	373	neutral
PDXK	Pyridoxal kinase	70.4296	1.84776	486	74.444	1.87183	530	1.057	0.0240747	723	neutral
ARPC3	Actin-related protein 2/3 complex subunit 3	70.3981	1.84756	485	62.7216	1.79742	476	0.890957	-0.0501433	322	neutral
LTA4H	Leukotriene A-4 hydrolase	69.9812	1.84498	484	66.87	1.82523	497	0.955542	-0.0197502	469	neutral
ITIH2	Inter-alpha-trypsin inhibitor heavy chain H2	69.165	1.83989	483	72.6	1.86094	523	1.04966	0.0210506	704	neutral
PYGL	Glycogen phosphorylase, liver form;Isoform 2 of Glycogen phosphorylase, liver form	68.8402	1.83784	482	66.9402	1.82569	498	0.9724	-0.012155	507	neutral
AGT	Angiotensinogen	68.6792	1.83683	481	65.4488	1.8159	492	0.952964	-0.0209233	461	neutral
ST13	Hsc70-interacting protein	68.5665	1.83611	480	67.8182	1.83135	502	0.989087	-0.0047653	553	neutral
EML2	Echinoderm microtubule-associated protein-like 2;Isoform 2 of Echinoderm microtubule-associated protein-like 2;Isoform 3 of Echinoderm microtubule-associated protein-like 2	68.4167	1.83516	479	65.8651	1.81866	494	0.962704	-0.0165071	481	neutral
MUC5AC	Mucin-5AC	67.7475	1.83089	478	56.5062	1.7521	435	0.83407	-0.0787974	233	neutral
NAPRT	Nicotinate phosphoribosyltransferase	67.4105	1.82873	477	72.4929	1.8603	522	1.07539	0.0315675	740	neutral
PSME2	Proteasome activator complex subunit 2	67.2955	1.82799	476	71.7508	1.85583	520	1.06621	0.0278408	731	neutral
PRSS3	Trypsin-3 (Fragment);Trypsin-3;Isoform 2 of Trypsin-3;Isoform 3 of Trypsin-3;Isoform 4 of Trypsin-3;Isoform 5 of Trypsin-3	67.1852	1.82727	475	69.1456	1.83976	507	1.02918	0.0124911	663	neutral
VPS4A	Vacuolar protein sorting-associated protein 4A	67.0772	1.82657	474	63.5674	1.80323	481	0.947676	-0.0233403	452	neutral
NQO1	NAD(P)H dehydrogenase [quinone] 1;NAD(P)H dehydrogenase [quinone] 1;Isoform 2 of NAD(P)H dehydrogenase [quinone] 1;Isoform 3 of NAD(P)H dehydrogenase [quinone] 1	66.9935	1.82603	473	65.3671	1.81536	490	0.975722	-0.010674	522	neutral
PSMB1	Proteasome subunit beta type-1	66.9164	1.82553	472	68.2576	1.83415	503	1.02004	0.00861815	641	neutral
TNFSF12-TNFSF13;TNFSF13;TNFSF12;TNFSF13;TNFSF13;TNFSF13;TNFSF13;TNFSF13	Protein TNFSF12-TNFSF13;Tumor necrosis factor ligand superfamily member 13;Isoform TWE-PRIL of Tumor necrosis factor ligand superfamily member 12;Tumor necrosis factor ligand superfamily member 13;Isoform Beta of Tumor necrosis factor ligand superfamily member 13;Isoform 4 of Tumor necrosis factor ligand superfamily member 13;Isoform 5 of Tumor necrosis factor ligand superfamily member 13;Tumor n…	66.6619	1.82388	471	54.2816	1.73465	420	0.814282	-0.089225	206	neutral
IQGAP1	Ras GTPase-activating-like protein IQGAP1	66.3533	1.82186	470	54.9497	1.73997	428	0.828138	-0.0818974	223	neutral
ALDH9A1	4-trimethylaminobutyraldehyde dehydrogenase	66.1141	1.82029	469	64.0252	1.80635	484	0.968404	-0.0139433	495	neutral
CAPZA1	F-actin-capping protein subunit alpha-1	66.0689	1.82	468	58.9042	1.77015	450	0.891557	-0.0498508	323	neutral
ALDOC	Fructose-bisphosphate aldolase;Fructose-bisphosphate aldolase C (Fragment);Fructose-bisphosphate aldolase C (Fragment);Fructose-bisphosphate aldolase C (Fragment);Fructose-bisphosphate aldolase C	66.0173	1.81966	467	65.0755	1.81342	489	0.985734	-0.00624012	542	neutral
P4HB	Protein disulfide-isomerase	65.8485	1.81855	466	57.8295	1.76215	442	0.878221	-0.0563961	294	neutral
CCT8	T-complex protein 1 subunit theta	65.7126	1.81765	465	63.6686	1.80393	482	0.968895	-0.0137232	498	neutral
STIP1	Stress-induced-phosphoprotein 1	65.6809	1.81744	464	56.283	1.75038	433	0.856915	-0.0670621	262	neutral
ANXA4	Annexin A4	65.5381	1.81649	463	61.2773	1.7873	469	0.934988	-0.0291939	422	neutral
PAM	Peptidyl-glycine alpha-amidating monooxygenase;Isoform 2 of Peptidyl-glycine alpha-amidating monooxygenase;Isoform 3 of Peptidyl-glycine alpha-amidating monooxygenase;Isoform 4 of Peptidyl-glycine alpha-amidating monooxygenase;Isoform 5 of Peptidyl-glycine alpha-amidating monooxygenase;Isoform 6 of Peptidyl-glycine alpha-amidating monooxygenase	64.9025	1.81226	462	43.0412	1.63388	336	0.663168	-0.178377	55	neutral
EIF6	Eukaryotic translation initiation factor 6	64.8702	1.81205	461	70.5295	1.84837	517	1.08724	0.0363259	758	neutral
ADH5	Alcohol dehydrogenase class-3	64.8297	1.81177	460	63.7897	1.80475	483	0.983958	-0.00702346	539	neutral
HNRNPA2B1	Heterogeneous nuclear ribonucleoproteins A2/B1	64.7426	1.81119	459	60.7931	1.78385	464	0.938998	-0.0273355	432	neutral
SHMT1	Serine hydroxymethyltransferase, cytosolic;Isoform 2 of Serine hydroxymethyltransferase, cytosolic	64.1531	1.80722	458	60.8481	1.78425	465	0.948484	-0.0229702	454	neutral
IGHV1-46	Immunoglobulin heavy variable 1-46	64.0203	1.80632	457	45.9324	1.66212	356	0.717467	-0.144198	107	neutral
ADSS2	Adenylosuccinate synthetase isozyme 2	63.9892	1.80611	456	58.2251	1.76511	445	0.90992	-0.0409968	365	neutral
TP53I3	Quinone oxidoreductase PIG3	63.976	1.80602	455	59.2791	1.7729	454	0.926583	-0.0331157	404	neutral
NDRG2	Protein NDRG2;Isoform 2 of Protein NDRG2	63.712	1.80422	454	64.4577	1.80927	487	1.0117	0.00505331	613	neutral
ANXA7	Annexin A7;Isoform 2 of Annexin A7	63.6535	1.80382	453	61.1069	1.78609	466	0.959992	-0.0177325	476	neutral
CAPZA2	F-actin-capping protein subunit alpha-2	63.0978	1.80001	452	48.4038	1.68488	385	0.767123	-0.115135	155	Validated protein signature
HSPA5	Endoplasmic reticulum chaperone BiP	63.008	1.7994	451	73.6998	1.86747	527	1.16969	0.0680706	813	neutral
KRT4	Keratin, type II cytoskeletal 4	62.9424	1.79894	450	33.1847	1.52094	215	0.527223	-0.278006	17	neutral
GALE	UDP-glucose 4-epimerase	62.2651	1.79424	449	59.8662	1.77718	458	0.961473	-0.0170631	478	neutral
SERPINA6	Corticosteroid-binding globulin	61.8629	1.79143	448	43.9056	1.64252	342	0.709725	-0.14891	101	neutral
RPS25	40S ribosomal protein S25	61.6269	1.78977	447	61.8613	1.79142	472	1.0038	0.00164862	599	neutral
COMT	Catechol O-methyltransferase;Isoform Soluble of Catechol O-methyltransferase	61.4367	1.78843	446	58.5902	1.76782	447	0.953667	-0.020603	465	neutral
NUCB1	Nucleobindin-1	61.0994	1.78604	445	46.409	1.6666	360	0.759566	-0.119434	149	neutral
PSMA7	Proteasome subunit alpha type-7	60.7365	1.78345	444	62.9868	1.79925	478	1.03705	0.0157999	675	neutral
SERPINF1	Pigment epithelium-derived factor	60.5643	1.78222	443	60.7576	1.7836	463	1.00319	0.0013839	595	neutral
H1-4	Histone H1.4	60.4078	1.78109	442	62.6571	1.79697	475	1.03724	0.0158775	678	neutral
UBE2N	Ubiquitin-conjugating enzyme E2 N	59.9355	1.77768	441	59.1569	1.77201	453	0.987008	-0.00567927	548	neutral
RAB5C	Ras-related protein Rab-5C;Isoform 2 of Ras-related protein Rab-5C	59.7803	1.77656	440	48.3762	1.68463	384	0.809233	-0.0919265	202	neutral
GBA	Glucosylceramidase;Glucosylceramidase;Lysosomal acid glucosylceramidase;Isoform Short of Lysosomal acid glucosylceramidase;Isoform 4 of Lysosomal acid glucosylceramidase	59.5658	1.775	439	61.5429	1.78918	470	1.03319	0.0141813	667	neutral
OAF	Out at first protein homolog	59.5476	1.77486	438	43.3093	1.63658	339	0.727306	-0.138283	118	neutral
HMGB1	High mobility group protein B1	59.4015	1.7738	437	52.7779	1.72245	408	0.888494	-0.0513453	319	neutral
PRKCSH	Glucosidase 2 subunit beta;Glucosidase 2 subunit beta;Isoform 2 of Glucosidase 2 subunit beta	59.3481	1.77341	436	57.8698	1.76245	443	0.975092	-0.0109543	518	neutral
CAND1	Cullin-associated NEDD8-dissociated protein 1	59.303	1.77308	435	52.9264	1.72367	411	0.892474	-0.0494045	325	neutral
ATIC	Bifunctional purine biosynthesis protein PURH	59.2723	1.77285	434	57.5535	1.76007	440	0.971001	-0.0127803	501	neutral
PSMB9	Proteasome subunit beta;Proteasome subunit beta;Proteasome subunit beta type-9;Isoform LMP2.S of Proteasome subunit beta type-9	59.2489	1.77268	433	54.4493	1.73599	422	0.918993	-0.036688	384	neutral
NANS	Sialic acid synthase	59.1809	1.77218	432	56.9614	1.75558	437	0.962495	-0.0166013	479	neutral
HEXB	Beta-hexosaminidase subunit beta	58.767	1.76913	431	46.7747	1.67001	363	0.795934	-0.099123	189	neutral
PPP2R1A	Serine/threonine-protein phosphatase 2A 65 kDa regulatory subunit A alpha isoform	58.6546	1.7683	430	58.9376	1.77039	451	1.00482	0.00209036	602	neutral
TSTA3	GDP-L-fucose synthase	58.6353	1.76816	429	60.4035	1.78106	461	1.03016	0.0129031	665	neutral
SCIN	Adseverin	58.5401	1.76745	428	50.6786	1.70482	393	0.865708	-0.0626286	273	neutral
KPRP	Keratinocyte proline-rich protein	58.4341	1.76667	427	103.738	2.01594	609	1.7753	0.249272	854	neutral
AHCYL1	S-adenosylhomocysteine hydrolase-like protein 1	58.3818	1.76628	426	59.5149	1.77463	457	1.01941	0.00834821	634	neutral
TPM4	Tropomyosin alpha-4 chain	58.1498	1.76455	425	37.2427	1.57104	273	0.640461	-0.193507	43	neutral
FOLR1	Folate receptor alpha	58.0652	1.76392	424	45.1369	1.65453	351	0.777348	-0.109384	166	neutral
IGKV6D-21	Immunoglobulin kappa variable 6D-21	58.028	1.76364	423	60.0495	1.77851	459	1.03484	0.0148718	673	neutral
CD9	Tetraspanin;Tetraspanin;Tetraspanin;CD9 antigen	57.9351	1.76294	422	41.2565	1.61549	317	0.712116	-0.147449	102	neutral
LUM	Lumican	57.8876	1.76259	421	47.875	1.68011	379	0.827032	-0.0824775	221	neutral
G6PD	Glucose-6-phosphate 1-dehydrogenase;Isoform Long of Glucose-6-phosphate 1-dehydrogenase	57.7894	1.76185	420	53.9369	1.73189	417	0.933335	-0.0299626	415	neutral
CEACAM7	Carcinoembryonic antigen-related cell adhesion molecule 7	57.6603	1.76088	419	52.8415	1.72298	409	0.916428	-0.0379017	376	neutral
ITIH4	Inter-alpha-trypsin inhibitor heavy chain H4	57.3167	1.75828	418	52.7701	1.72239	407	0.920674	-0.0358939	388	neutral
CD44	CD44 antigen (Fragment);CD44 antigen (Fragment);CD44 antigen;CD44 antigen (Fragment);CD44 antigen;Isoform 10 of CD44 antigen;Isoform 11 of CD44 antigen;Isoform 12 of CD44 antigen;Isoform 13 of CD44 antigen;Isoform 14 of CD44 antigen;Isoform 15 of CD44 antigen;Isoform 16 of CD44 antigen;Isoform 17 of CD44 antigen;Isoform 18 of CD44 antigen;Isoform 3 of CD44 antigen;Isoform 4 of CD44 antigen;Isofor…	56.5219	1.75222	417	35.5674	1.55105	253	0.629268	-0.201165	40	neutral
SERPINB3	Serpin B3	56.504	1.75208	416	80.6376	1.90654	546	1.42711	0.154459	848	neutral
SAR1A	GTP-binding protein SAR1a	56.2282	1.74995	415	59.2808	1.77291	455	1.05429	0.02296	715	neutral
MUC16	Mucin-16	56.2003	1.74974	414	35.26	1.54728	245	0.627399	-0.202456	39	neutral
CASP3	Caspase-3	55.9625	1.7479	413	54.8662	1.7393	425	0.980411	-0.00859198	532	neutral
NSF	Vesicle-fusing ATPase	55.8897	1.74733	412	47.5587	1.67723	374	0.850937	-0.0701026	251	neutral
PFAS	Phosphoribosylformylglycinamidine synthase	55.7468	1.74622	411	141.532	2.15086	668	2.53884	0.404636	869	Top 10 most abundant
SOD3	Extracellular superoxide dismutase [Cu-Zn]	55.3462	1.74309	410	54.4752	1.7362	423	0.984263	-0.0068889	540	neutral
RAB7A	Ras-related protein Rab-7a	55.3159	1.74285	409	55.4944	1.74425	430	1.00323	0.00139919	596	neutral
GBP1	Guanylate-binding protein 1	54.9263	1.73978	408	146.789	2.16669	676	2.67247	0.426913	870	Top 10 most abundant
EEF1B2	Elongation factor 1-beta	54.8526	1.7392	407	54.9479	1.73995	427	1.00174	0.000754406	590	neutral
PRPS1	Ribose-phosphate pyrophosphokinase;Ribose-phosphate pyrophosphokinase 1;Ribose-phosphate pyrophosphokinase 1	54.8132	1.73889	406	51.858	1.71482	399	0.946085	-0.0240697	444	neutral
BROX	BRO1 domain-containing protein BROX	54.8099	1.73886	405	63.473	1.80259	479	1.15806	0.06373	807	neutral
CAPS	Isoform 3 of Calcyphosin	54.8018	1.7388	404	57.5168	1.7598	438	1.04954	0.0209999	702	neutral
APEH	Acylamino-acid-releasing enzyme	54.534	1.73667	403	55.7396	1.74616	432	1.02211	0.00949625	649	neutral
AP1B1	Isoform C of AP-1 complex subunit beta-1	53.9391	1.7319	402	39.5223	1.59684	302	0.732721	-0.135062	124	neutral
PSMA5	Proteasome subunit alpha type-5	53.5543	1.72879	401	53.9772	1.73221	419	1.0079	0.00341591	608	neutral
GOT1	Aspartate aminotransferase, cytoplasmic;Isoform 2 of Aspartate aminotransferase, cytoplasmic	53.1424	1.72544	400	46.8379	1.6706	365	0.881365	-0.054844	299	neutral
ACP1	Low molecular weight phosphotyrosine protein phosphatase	53.1234	1.72529	399	58.6586	1.76833	448	1.1042	0.0430459	775	neutral
KRT6B	Keratin, type II cytoskeletal 6B	52.88	1.72329	398	155.934	2.19294	689	2.94883	0.469649	874	Top 10 most abundant
RPS3	40S ribosomal protein S3	52.8463	1.72301	397	52.4656	1.71987	406	0.992795	-0.00314028	560	neutral
HNRNPA1	Heterogeneous nuclear ribonucleoprotein A1;Heterogeneous nuclear ribonucleoprotein A1;Isoform A1-A of Heterogeneous nuclear ribonucleoprotein A1;Isoform 2 of Heterogeneous nuclear ribonucleoprotein A1	52.7648	1.72234	396	54.8735	1.73936	426	1.03996	0.0170183	683	neutral
ARPC2	Actin-related protein 2/3 complex subunit 2	52.6919	1.72174	395	48.7797	1.68824	387	0.925754	-0.0335042	402	neutral
PSAPL1	Proactivator polypeptide-like 1	52.6027	1.72101	394	72.8168	1.86223	524	1.38428	0.141223	847	neutral
KRT77	Keratin, type II cytoskeletal 1b	52.4245	1.71953	393	149.716	2.17527	683	2.85584	0.455733	873	Top 10 most abundant
AKR1C2	Aldo-keto reductase family 1 member C2	52.2283	1.71791	392	46.3522	1.66607	358	0.887491	-0.0518359	312	neutral
KRT19	Keratin, type I cytoskeletal 19	52.0755	1.71663	391	46.7919	1.67017	364	0.898538	-0.0464634	342	neutral
PLIN3	Perilipin-3;Isoform 4 of Perilipin-3	51.7673	1.71406	390	47.829	1.67969	378	0.923922	-0.0343648	398	neutral
DDB1	DNA damage-binding protein 1	51.3535	1.71057	389	304.773	2.48398	757	5.9348	0.773406	876	Top 10 most abundant
GMPPB	Mannose-1-phosphate guanyltransferase beta;Isoform 2 of Mannose-1-phosphate guanyltransferase beta	51.3044	1.71015	388	50.0048	1.69901	390	0.974668	-0.0111431	513	neutral
PFKL	ATP-dependent 6-phosphofructokinase, liver type	51.2487	1.70968	387	42.9454	1.63292	334	0.83798	-0.0767663	238	Validated protein signature
CORO1B	Coronin-1B	51.2168	1.70941	386	54.342	1.73514	421	1.06102	0.0257229	728	neutral
CCT3	T-complex protein 1 subunit gamma	51.1525	1.70887	385	50.8437	1.70624	395	0.993962	-0.00263033	565	neutral
YWHAQ	14-3-3 protein theta	51.0022	1.70759	384	53.4874	1.72825	415	1.04873	0.0206628	700	neutral
SSH3	Protein phosphatase Slingshot homolog 3	50.8927	1.70666	383	48.3552	1.68444	383	0.95014	-0.0222125	460	neutral
AFM	Afamin	50.8049	1.70591	382	45.0047	1.65326	349	0.885833	-0.0526482	309	neutral
C4BPA	C4b-binding protein alpha chain	50.7651	1.70556	381	35.6496	1.55205	255	0.702246	-0.15351	91	neutral
NAGK	N-acetyl-D-glucosamine kinase	50.6765	1.70481	380	56.3324	1.75076	434	1.11161	0.0459522	783	neutral
TXNL1	Thioredoxin-like protein 1	50.5435	1.70367	379	50.7917	1.70579	394	1.00491	0.00212705	603	neutral
PODXL	Podocalyxin;Isoform 2 of Podocalyxin	50.4772	1.70309	378	33.7951	1.52885	223	0.669512	-0.174241	64	neutral
PSMB4	Proteasome subunit beta type-4	50.4482	1.70285	377	47.7958	1.67939	377	0.947422	-0.0234564	450	neutral
ATP6V1A	V-type proton ATPase catalytic subunit A;Isoform 2 of V-type proton ATPase catalytic subunit A	50.3712	1.70218	376	50.2143	1.70083	391	0.996885	-0.001355	575	neutral
BLVRA	Biliverdin reductase A	50.1103	1.69993	375	48.4868	1.68562	386	0.967602	-0.014303	492	neutral
GYG1	Glycogenin-1;Isoform GN-1 of Glycogenin-1	50.0611	1.6995	374	52.8526	1.72307	410	1.05576	0.0235666	720	neutral
LSR	Lipolysis-stimulated lipoprotein receptor;Isoform 4 of Lipolysis-stimulated lipoprotein receptor;Isoform 5 of Lipolysis-stimulated lipoprotein receptor;Isoform 6 of Lipolysis-stimulated lipoprotein receptor;Lipolysis-stimulated lipoprotein receptor	49.9144	1.69823	373	38.9539	1.59055	292	0.780415	-0.107675	169	neutral
CLTC	Clathrin heavy chain;Clathrin heavy chain 1;Isoform 2 of Clathrin heavy chain 1	49.8805	1.69793	372	46.2963	1.66555	357	0.928144	-0.0323846	410	neutral
CRYM	Ketimine reductase mu-crystallin	49.7681	1.69695	371	41.1767	1.61465	316	0.827371	-0.0822999	222	Validated protein signature
PGM1	Phosphoglucomutase-1	49.7338	1.69665	370	52.2488	1.71808	403	1.05057	0.021425	707	neutral
PDLIM1	PDZ and LIM domain protein 1	49.5447	1.695	369	47.2524	1.67442	370	0.953733	-0.0205732	466	neutral
IMPA1	Inositol monophosphatase 1;Isoform 3 of Inositol monophosphatase 1	49.415	1.69386	368	47.3345	1.67518	372	0.957899	-0.0186802	473	neutral
CDC42	Cell division control protein 42 homolog	49.2548	1.69245	367	57.5401	1.75997	439	1.16821	0.0675222	812	neutral
PPP1CB	Serine/threonine-protein phosphatase PP1-beta catalytic subunit	49.2444	1.69236	366	47.9163	1.68048	380	0.97303	-0.0118739	510	neutral
LYPLA1	Acyl-protein thioesterase 1;Acyl-protein thioesterase 1;Isoform 2 of Acyl-protein thioesterase 1	49.2356	1.69228	365	59.3315	1.77329	456	1.20505	0.081006	827	neutral
KYNU	Kynureninase	49.1962	1.69193	364	45.1614	1.65477	352	0.917987	-0.0371637	381	neutral
IGKV1-27	Immunoglobulin kappa variable 1-27	49.1819	1.69181	363	36.2718	1.55957	263	0.737504	-0.132236	129	neutral
GGCT	Gamma-glutamylcyclotransferase	48.9808	1.69003	362	61.1158	1.78615	467	1.24775	0.0961273	838	neutral
C11orf54	Ester hydrolase C11orf54;Ester hydrolase C11orf54;Isoform 2 of Ester hydrolase C11orf54	48.9272	1.68955	361	46.882	1.67101	366	0.958201	-0.0185436	474	neutral
TCP1	T-complex protein 1 subunit alpha	48.8769	1.6891	360	43.6455	1.63994	341	0.892966	-0.0491649	326	neutral
CALML5	Calmodulin-like protein 5	48.5459	1.68615	359	39.1034	1.59221	296	0.805493	-0.0939383	199	neutral
PPP1R7	Protein phosphatase 1 regulatory subunit 7	48.5224	1.68594	358	58.0408	1.76373	444	1.19616	0.0777911	825	neutral
RAB1B	Ras-related protein Rab-1B	48.5096	1.68583	357	53.9469	1.73197	418	1.11209	0.0461391	784	neutral
EFHD2	EF-hand domain-containing protein D2	48.3318	1.68423	356	42.9323	1.63278	333	0.888281	-0.0514496	318	neutral
FAM3B	Protein FAM3B;Protein FAM3B;Isoform A of Protein FAM3B	48.3148	1.68408	355	40.3386	1.60572	307	0.834912	-0.0783591	234	neutral
PSMA2	Proteasome subunit alpha type;Proteasome subunit alpha type-2	48.2087	1.68312	354	45.5767	1.65874	354	0.945406	-0.0243818	442	neutral
EEF1G	Elongation factor 1-gamma	48.1746	1.68282	353	49.8496	1.69766	389	1.03477	0.0148432	671	neutral
EEF1D	Elongation factor 1-delta (Fragment);Elongation factor 1-delta	48.1138	1.68227	352	50.5298	1.70355	392	1.05022	0.0212783	705	neutral
RACK1	Receptor of activated protein C kinase 1	48.0562	1.68175	351	41.0795	1.61362	315	0.854821	-0.0681249	258	neutral
ST3GAL1	CMP-N-acetylneuraminate-beta-galactosamide-alpha-2,3-sialyltransferase 1	47.9423	1.68072	350	39.4814	1.59639	301	0.82352	-0.084326	217	neutral
USP5	Ubiquitin carboxyl-terminal hydrolase 5;Isoform Short of Ubiquitin carboxyl-terminal hydrolase 5	47.8963	1.6803	349	49.5624	1.69515	388	1.03478	0.0148499	672	neutral
PSMA3	Proteasome subunit alpha type-3;Isoform 2 of Proteasome subunit alpha type-3	47.6824	1.67836	348	52.3638	1.71903	404	1.09818	0.0406729	770	neutral
C9	Complement component C9	47.5296	1.67696	347	38.9783	1.59082	293	0.820085	-0.0861409	215	neutral
SERPINB6	Serpin B6	47.3126	1.67498	346	37.5536	1.57465	277	0.793734	-0.100325	187	neutral
RPS9	40S ribosomal protein S9	47.2281	1.6742	345	44.4825	1.64819	345	0.941865	-0.0260111	435	neutral
GPD1L	Glycerol-3-phosphate dehydrogenase 1-like protein	47.1873	1.67383	344	48.0102	1.68133	382	1.01744	0.00750847	630	neutral
CXCL17	C-X-C motif chemokine 17	47.1533	1.67351	343	31.4258	1.49729	191	0.666459	-0.176226	59	neutral
ADK	Adenosine kinase;Isoform 2 of Adenosine kinase;Isoform 3 of Adenosine kinase	46.9959	1.67206	342	46.6722	1.66906	362	0.993113	-0.00300137	561	neutral
OTUB1	Ubiquitin thioesterase OTUB1;Ubiquitin thioesterase;Ubiquitin thioesterase OTUB1	46.9602	1.67173	341	41.0187	1.61298	314	0.873478	-0.0587483	284	neutral
VCL	Vinculin;Isoform 1 of Vinculin	46.9411	1.67155	340	47.5798	1.67742	375	1.0136	0.00586873	619	neutral
F2	Prothrombin	46.7159	1.66946	339	46.4387	1.66688	361	0.994065	-0.00258506	566	neutral
MDH2	Malate dehydrogenase, mitochondrial	46.6906	1.66923	338	36.7169	1.56487	269	0.786388	-0.104363	180	neutral
ALAD	Delta-aminolevulinic acid dehydratase	46.5468	1.66789	337	41.6313	1.61942	319	0.894397	-0.0484698	331	neutral
RPS14	40S ribosomal protein S14 (Fragment);40S ribosomal protein S14	46.5362	1.66779	336	44.4991	1.64835	346	0.956225	-0.0194398	471	neutral
PREP	Prolyl endopeptidase	45.7153	1.66006	335	44.7141	1.65044	348	0.978099	-0.00961731	527	neutral
DPP4	Dipeptidyl peptidase 4	45.64	1.65935	334	32.3183	1.50945	203	0.708113	-0.149898	100	neutral
PFKP	ATP-dependent 6-phosphofructokinase, platelet type	45.5951	1.65892	333	38.025	1.58007	282	0.833972	-0.0788485	232	neutral
CTPS1	CTP synthase;CTP synthase 1	45.5842	1.65881	332	39.9253	1.60125	304	0.875857	-0.0575669	288	neutral
GFPT1	Glutamine--fructose-6-phosphate aminotransferase [isomerizing] 1;Isoform 2 of Glutamine--fructose-6-phosphate aminotransferase [isomerizing] 1	45.5088	1.6581	331	40.8142	1.61081	310	0.896843	-0.0472838	339	neutral
CCT6A	T-complex protein 1 subunit zeta	45.4989	1.658	330	42.0274	1.62353	323	0.923703	-0.0344676	397	neutral
ABHD14B	Protein ABHD14B	44.8111	1.65139	329	41.8412	1.6216	321	0.933723	-0.0297818	416	neutral
APOA4	Apolipoprotein A-IV	44.7991	1.65127	328	51.382	1.71081	397	1.14694	0.0595413	801	neutral
COASY	Bifunctional coenzyme A synthase;Isoform 2 of Bifunctional coenzyme A synthase	44.585	1.64919	327	40.9376	1.61212	312	0.918192	-0.0370667	383	neutral
PTGR1	Prostaglandin reductase 1;Prostaglandin reductase 1;Isoform 2 of Prostaglandin reductase 1	44.0828	1.64427	326	38.8704	1.58962	290	0.88176	-0.0546495	300	neutral
CTSC	Dipeptidyl peptidase 1	44.0589	1.64403	325	36.4032	1.56114	266	0.826238	-0.0828946	220	neutral
CALR	Calreticulin	43.9142	1.64261	324	41.9917	1.62316	322	0.956221	-0.0194415	470	neutral
PDCD10	Programmed cell death protein 10	43.535	1.63884	323	39.0202	1.59129	294	0.896295	-0.0475491	337	neutral
MTAP	S-methyl-5'-thioadenosine phosphorylase	43.3594	1.63708	322	42.8675	1.63213	332	0.988657	-0.00495443	551	neutral
SDF4	45 kDa calcium-binding protein	43.3578	1.63707	321	35.5537	1.55088	252	0.820007	-0.0861824	214	neutral
CCT2	T-complex protein 1 subunit beta	43.3331	1.63682	320	43.0835	1.63431	337	0.99424	-0.00250886	568	neutral
DSG1	Desmoglein-1	43.3222	1.63671	319	53.1382	1.72541	414	1.22658	0.0886961	832	neutral
PSMA1	Proteasome subunit alpha type-1;Isoform Long of Proteasome subunit alpha type-1	43.3162	1.63665	318	47.1407	1.6734	367	1.08829	0.0367465	761	neutral
RAB2A	Ras-related protein Rab-2A	43.302	1.63651	317	42.7541	1.63098	329	0.987347	-0.00553023	550	neutral
SERPINB2	Plasminogen activator inhibitor 2	43.0985	1.63446	316	40.9114	1.61184	311	0.949253	-0.0226181	457	neutral
CTTN	Src substrate cortactin	42.5099	1.62849	315	43.0316	1.63379	335	1.01227	0.00529676	616	neutral
GPX4	Glutathione peroxidase;Glutathione peroxidase;Glutathione peroxidase (Fragment);Phospholipid hydroperoxide glutathione peroxidase;Isoform Cytoplasmic of Phospholipid hydroperoxide glutathione peroxidase	42.4642	1.62802	314	44.4091	1.64747	344	1.0458	0.0194488	696	neutral
TWF1	Twinfilin-1	42.1761	1.62507	313	36.8315	1.56622	271	0.87328	-0.0588465	282	neutral
SERPIND1	Heparin cofactor 2	42.1135	1.62442	312	30.7818	1.48829	183	0.730925	-0.136127	120	neutral
XPNPEP1	Isoform 3 of Xaa-Pro aminopeptidase 1	41.2337	1.61525	311	38.8982	1.58993	291	0.94336	-0.0253226	437	neutral
CRIP2	Cysteine-rich protein 2	41.2082	1.61498	310	42.234	1.62566	326	1.02489	0.0106782	656	neutral
PSMB3	Proteasome subunit beta type-3 (Fragment);Proteasome subunit beta type-3	41.1404	1.61427	309	35.7232	1.55295	257	0.868324	-0.061318	276	neutral
SLC34A2	Sodium-dependent phosphate transport protein 2B;Isoform 2 of Sodium-dependent phosphate transport protein 2B	41.1293	1.61415	308	43.3844	1.63733	340	1.05483	0.0231818	718	neutral
SIL1	Nucleotide exchange factor SIL1	41.0683	1.61351	307	26.7905	1.42798	128	0.652342	-0.185525	48	neutral
RBBP9	Serine hydrolase RBBP9;Isoform 2 of Serine hydrolase RBBP9	41.01	1.61289	306	47.285	1.67472	371	1.15301	0.0618337	803	neutral
CFI	Complement factor I	40.9667	1.61243	305	37.5584	1.57471	278	0.916804	-0.0377233	377	neutral
RPL22;;RPL22;RPL22;RPL22;RPL22;RPL22	60S ribosomal protein L22 (Fragment);Uncharacterized protein;60S ribosomal protein L22 (Fragment);60S ribosomal protein L22 (Fragment);60S ribosomal protein L22 (Fragment);60S ribosomal protein L22;60S ribosomal protein L22	40.869	1.61139	304	47.9266	1.68058	381	1.17269	0.0691824	814	neutral
NARS1	Asparagine--tRNA ligase, cytoplasmic	40.8287	1.61097	303	45.8152	1.66101	355	1.12213	0.0500441	792	neutral
ATRN	Attractin;Isoform 2 of Attractin;Isoform 3 of Attractin	40.7407	1.61003	302	31.0695	1.49233	185	0.762617	-0.117694	152	neutral
SCRN1	Secernin-1;Isoform 2 of Secernin-1	40.6937	1.60953	301	39.585	1.59753	303	0.972755	-0.0119967	508	neutral
LASP1	LIM and SH3 domain protein 1;Isoform 2 of LIM and SH3 domain protein 1	40.6659	1.60923	300	37.3786	1.57262	275	0.919164	-0.036607	385	neutral
FOLH1	Glutamate carboxypeptidase 2;Isoform PSMA' of Glutamate carboxypeptidase 2;Isoform PSMA-7 of Glutamate carboxypeptidase 2;Isoform PSMA-8 of Glutamate carboxypeptidase 2;Isoform PSMA-9 of Glutamate carboxypeptidase 2	40.5721	1.60823	299	29.4905	1.46968	153	0.726866	-0.138546	116	neutral
CAPNS2	Calpain small subunit 2	40.5497	1.60799	298	46.4067	1.66658	359	1.14444	0.0585931	798	neutral
ESD	S-formylglutathione hydrolase	40.4995	1.60745	297	42.0887	1.62417	324	1.03924	0.0167155	682	neutral
NUTF2	Nuclear transport factor 2	40.3144	1.60546	296	42.2618	1.62595	327	1.0483	0.0204876	699	neutral
PDGFC	Platelet-derived growth factor C	40.2901	1.6052	295	36.2727	1.55958	264	0.900287	-0.0456192	347	neutral
MAPK1	Mitogen-activated protein kinase 1	40.224	1.60449	294	40.0609	1.60272	305	0.995946	-0.00176405	571	neutral
F11R	Junctional adhesion molecule A	40.2174	1.60441	293	42.4099	1.62747	328	1.05451	0.0230524	716	neutral
GOLM1	Golgi membrane protein 1;Isoform 2 of Golgi membrane protein 1	40.1154	1.60331	292	31.2653	1.49506	188	0.779383	-0.108249	167	neutral
CCDC6	Coiled-coil domain-containing protein 6	40.04	1.60249	291	39.0429	1.59154	295	0.975098	-0.0109516	519	neutral
ARPC1B	Actin-related protein 2/3 complex subunit 1B	40.0235	1.60232	290	34.9983	1.54405	243	0.874444	-0.0582678	286	neutral
CTSZ	Cathepsin Z	39.9846	1.60189	289	35.5529	1.55087	251	0.889164	-0.0510181	320	neutral
RPS8	40S ribosomal protein S8	39.8954	1.60092	288	39.2176	1.59348	298	0.983011	-0.00744183	538	neutral
NEU1	Sialidase-1	39.8047	1.59993	287	33.0318	1.51893	212	0.829845	-0.0810029	229	neutral
CDC37	Hsp90 co-chaperone Cdc37	39.5339	1.59697	286	40.3668	1.60602	308	1.02107	0.00905474	645	neutral
SET	Protein SET;Protein SET;Isoform 2 of Protein SET;Isoform 3 of Protein SET;Isoform 4 of Protein SET	39.5155	1.59677	285	42.8263	1.63171	331	1.08378	0.0349431	751	neutral
PSMC3	26S proteasome regulatory subunit 6A	39.3972	1.59547	284	35.7744	1.55357	258	0.908045	-0.0418927	361	neutral
AKR7A2	Aflatoxin B1 aldehyde reductase member 2 (Fragment);Aflatoxin B1 aldehyde reductase member 2	39.3113	1.59452	283	37.3385	1.57216	274	0.949815	-0.022361	458	neutral
PPCS	Phosphopantothenate--cysteine ligase	39.2497	1.59384	282	39.3964	1.59546	300	1.00374	0.00162023	597	neutral
GDI1	Rab GDP dissociation inhibitor alpha	39.0909	1.59208	281	39.2392	1.59372	299	1.00379	0.00164396	598	neutral
PAFAH1B1	Platelet-activating factor acetylhydrolase IB subunit alpha	39.0118	1.5912	280	35.883	1.55489	261	0.919799	-0.036307	386	neutral
HSPA4	Heat shock 70 kDa protein 4	38.9495	1.5905	279	35.6346	1.55187	254	0.914892	-0.0386301	374	neutral
DSP	Desmoplakin	38.9369	1.59036	278	56.5211	1.75221	436	1.45161	0.16185	849	neutral
CTSS	Cathepsin S	38.8528	1.58942	277	34.3313	1.53569	233	0.883626	-0.0537316	303	neutral
ADGRG6	Adhesion G-protein coupled receptor G6;Isoform 2 of Adhesion G-protein coupled receptor G6;Isoform 3 of Adhesion G-protein coupled receptor G6;Isoform 4 of Adhesion G-protein coupled receptor G6	38.7313	1.58806	276	28.3253	1.45217	143	0.731328	-0.135888	121	neutral
EIF4G1	Eukaryotic translation initiation factor 4 gamma 1;Eukaryotic translation initiation factor 4 gamma 1;Eukaryotic translation initiation factor 4 gamma 1;Eukaryotic translation initiation factor 4 gamma 1;Isoform B of Eukaryotic translation initiation factor 4 gamma 1;Isoform C of Eukaryotic translation initiation factor 4 gamma 1;Isoform D of Eukaryotic translation initiation factor 4 gamma 1;Iso…	38.6278	1.5869	275	30.1581	1.4794	175	0.780737	-0.107495	171	neutral
PDCD4	Programmed cell death protein 4;Isoform 2 of Programmed cell death protein 4	38.592	1.5865	274	40.5801	1.60831	309	1.05152	0.0218159	710	neutral
IGLV6-57	Immunoglobulin lambda variable 6-57	38.5261	1.58575	273	27.176	1.43418	132	0.705392	-0.15157	97	neutral
TSN	Translin	38.4878	1.58532	272	40.2983	1.60529	306	1.04704	0.0199636	697	neutral
CPPED1	Serine/threonine-protein phosphatase CPPED1	38.4805	1.58524	271	42.1853	1.62516	325	1.09628	0.0399197	768	neutral
PSMB2	Proteasome subunit beta type-2	38.4448	1.58484	270	45.4292	1.65734	353	1.18167	0.0724976	819	neutral
PPP2CA	Serine/threonine-protein phosphatase 2A catalytic subunit alpha isoform	38.3967	1.58429	269	36.9657	1.5678	272	0.962731	-0.0164951	482	neutral
PGM2	Phosphoglucomutase-2	38.3819	1.58413	268	41.3026	1.61598	318	1.07609	0.0318504	741	neutral
TMSB4X	Thymosin beta-4	38.3445	1.5837	267	34.0562	1.5322	228	0.888165	-0.0515065	317	neutral
HYOU1	Hypoxia up-regulated protein 1	38.2723	1.58288	266	25.9079	1.41343	115	0.676935	-0.169453	75	neutral
GNPDA1	Glucosamine-6-phosphate isomerase 1	38.1314	1.58128	265	38.5418	1.58593	286	1.01076	0.00464939	610	neutral
NIBAN2	Protein Niban 2;Isoform 2 of Protein Niban 2	38.0459	1.58031	264	35.7176	1.55288	256	0.938803	-0.0274257	431	neutral
RCN1	Reticulocalbin-1	37.9816	1.57957	263	34.9807	1.54383	239	0.920992	-0.0357441	390	neutral
CHID1	Chitinase domain-containing protein 1;Isoform 2 of Chitinase domain-containing protein 1;Isoform 3 of Chitinase domain-containing protein 1	37.9714	1.57946	262	26.5289	1.42372	124	0.698655	-0.155737	89	neutral
PHGDH	D-3-phosphoglycerate dehydrogenase	37.918	1.57885	261	40.9526	1.61228	313	1.08003	0.0334363	745	neutral
VWA5A	von Willebrand factor A domain-containing protein 5A	37.8978	1.57861	260	35.5269	1.55056	250	0.937438	-0.0280574	427	neutral
CANT1	Soluble calcium-activated nucleotidase 1;Isoform 3 of Soluble calcium-activated nucleotidase 1	37.8365	1.57791	259	33.0811	1.51958	214	0.874318	-0.0583307	285	neutral
SMS	Spermine synthase;Isoform 2 of Spermine synthase	37.8359	1.5779	258	31.2133	1.49434	186	0.824964	-0.0835651	219	neutral
OLA1	Obg-like ATPase 1	37.8255	1.57778	257	38.4309	1.58468	285	1.016	0.00689584	627	neutral
FDPS	Farnesyl pyrophosphate synthase;Isoform 2 of Farnesyl pyrophosphate synthase	37.805	1.57755	256	41.6934	1.62007	320	1.10285	0.0425174	774	neutral
PLS1	Plastin-1	37.7236	1.57661	255	38.6451	1.58709	289	1.02443	0.0104819	654	neutral
CARHSP1	Calcium-regulated heat-stable protein 1	37.6849	1.57617	254	36.5052	1.56236	267	0.968696	-0.0138126	497	neutral
HNRNPD	Heterogeneous nuclear ribonucleoprotein D0 (Fragment);Heterogeneous nuclear ribonucleoprotein D0 (Fragment);Heterogeneous nuclear ribonucleoprotein D0;Isoform 2 of Heterogeneous nuclear ribonucleoprotein D0;Isoform 3 of Heterogeneous nuclear ribonucleoprotein D0;Isoform 4 of Heterogeneous nuclear ribonucleoprotein D0	37.6805	1.57612	253	44.6633	1.64995	347	1.18532	0.0738342	821	neutral
SARS;SARS1	Serine--tRNA ligase, cytoplasmic;Seryl-tRNA synthetase 1	37.5184	1.57424	252	34.31	1.53542	232	0.914486	-0.038823	372	neutral
LGALS7	Galectin-7	37.2284	1.57087	251	91.0739	1.95939	584	2.44635	0.388519	868	Top 10 most abundant
PEPD	Xaa-Pro dipeptidase	37.1014	1.56939	250	37.5961	1.57514	279	1.01333	0.00575209	618	neutral
USP14	Ubiquitin carboxyl-terminal hydrolase 14;Isoform 2 of Ubiquitin carboxyl-terminal hydrolase 14	37.0976	1.56935	249	35.172	1.5462	244	0.948095	-0.0231484	453	neutral
ALDH7A1	Isoform 2 of Alpha-aminoadipic semialdehyde dehydrogenase	37.0065	1.56828	248	38.5546	1.58608	287	1.04183	0.0177989	689	neutral
ENOPH1	Enolase-phosphatase E1	36.9759	1.56792	247	32.4977	1.51185	205	0.878889	-0.0560662	295	neutral
PROM1	Prominin-1;Isoform 2 of Prominin-1;Isoform 3 of Prominin-1;Isoform 4 of Prominin-1;Isoform 5 of Prominin-1;Isoform 6 of Prominin-1;Isoform 7 of Prominin-1	36.8485	1.56642	246	29.432	1.46882	151	0.79873	-0.0976002	191	neutral
EHD1	EH domain-containing protein 1	36.68	1.56443	245	42.7581	1.63102	330	1.16571	0.0665892	810	neutral
MANBA	Beta-mannosidase	36.5955	1.56343	244	29.9688	1.47667	168	0.818919	-0.0867592	213	neutral
THBS1	Thrombospondin-1	36.5926	1.56339	243	31.015	1.49157	184	0.847576	-0.0718212	246	neutral
DCXR	L-xylulose reductase (Fragment);L-xylulose reductase (Fragment);L-xylulose reductase	36.4753	1.562	242	43.3054	1.63654	338	1.18725	0.074543	823	neutral
SPTAN1	Spectrin alpha chain, non-erythrocytic 1;Isoform 3 of Spectrin alpha chain, non-erythrocytic 1	36.4399	1.56158	241	24.2393	1.38452	81	0.665184	-0.177058	57	neutral
SLC9A3R1	Na(+)/H(+) exchange regulatory cofactor NHE-RF1	36.4349	1.56152	240	34.1776	1.53374	230	0.938044	-0.0277766	429	neutral
DSC2	Desmocollin-2;Isoform 2B of Desmocollin-2	36.4085	1.5612	239	27.5952	1.44083	134	0.757933	-0.120369	147	neutral
APOB	Apolipoprotein B-100	36.1888	1.55857	238	26.2826	1.41967	120	0.726263	-0.138906	115	neutral
TPP1	Tripeptidyl-peptidase 1	36.1611	1.55824	237	32.0038	1.5052	197	0.885034	-0.0530401	306	neutral
MTHFD1	C-1-tetrahydrofolate synthase, cytoplasmic	36.0195	1.55654	236	36.0385	1.55677	262	1.00053	0.000228985	585	neutral
GALNT5	Polypeptide N-acetylgalactosaminyltransferase 5	35.9971	1.55627	235	19.4249	1.28836	19	0.539623	-0.26791	18	neutral
NDRG1	Protein NDRG1	35.9813	1.55608	234	37.5397	1.57449	276	1.04331	0.0184149	692	neutral
ETF1	Eukaryotic peptide chain release factor subunit 1;Eukaryotic peptide chain release factor subunit 1;Isoform 2 of Eukaryotic peptide chain release factor subunit 1	35.9299	1.55546	233	32.2751	1.50887	202	0.89828	-0.0465881	341	neutral
UPK3BL1;UPK3BL2	Uroplakin-3b-like protein 1;Uroplakin-3b-like protein 2	35.8272	1.55421	232	33.2364	1.52161	217	0.927687	-0.0325986	408	neutral
TPT1	Translationally-controlled tumor protein	35.797	1.55385	231	34.8002	1.54158	236	0.972155	-0.0122644	505	neutral
ATP6V1B2	V-type proton ATPase subunit B, brain isoform	35.6852	1.55249	230	39.1787	1.59305	297	1.0979	0.0405628	769	neutral
CCT4	T-complex protein 1 subunit delta	35.5823	1.55123	229	35.8404	1.55437	260	1.00725	0.00313941	606	neutral
HLA-C	HLA class I histocompatibility antigen, C alpha chain;HLA class I histocompatibility antigen, C alpha chain;HLA class I histocompatibility antigen, C alpha chain;HLA class I histocompatibility antigen, C alpha chain	35.5486	1.55082	228	31.7788	1.50214	195	0.893954	-0.048685	330	neutral
EIF4H	Eukaryotic translation initiation factor 4H;Isoform Short of Eukaryotic translation initiation factor 4H	35.3496	1.54838	227	33.4877	1.52489	220	0.947329	-0.0234989	448	neutral
ARF4	ADP-ribosylation factor 4	35.2972	1.54774	226	36.6243	1.56377	268	1.0376	0.0160294	680	neutral
CRYZ	Quinone oxidoreductase	35.2176	1.54676	225	33.8015	1.52894	224	0.959792	-0.0178231	475	neutral
TRIP10	Cdc42-interacting protein 4;Isoform 2 of Cdc42-interacting protein 4	35.123	1.54559	224	37.7573	1.577	280	1.075	0.0314087	739	neutral
ASNA1	ATPase ASNA1	35.1105	1.54544	223	35.8079	1.55398	259	1.01986	0.00854194	638	neutral
RPS4X	40S ribosomal protein S4, X isoform	35.0495	1.54468	222	33.2011	1.52115	216	0.947264	-0.0235289	447	neutral
KLK11	Kallikrein-11;Isoform 1 of Kallikrein-11;Isoform 3 of Kallikrein-11;Isoform 4 of Kallikrein-11	34.993	1.54398	221	34.1137	1.53293	229	0.974874	-0.0110517	516	neutral
RPL6	60S ribosomal protein L6	34.9093	1.54294	220	29.4835	1.46958	152	0.844573	-0.0733626	244	neutral
RPSA	40S ribosomal protein SA;40S ribosomal protein SA (Fragment);40S ribosomal protein SA	34.8239	1.54188	219	35.5072	1.55032	249	1.01962	0.00843931	637	neutral
STOM	Erythrocyte band 7 integral membrane protein	34.773	1.54124	218	24.5112	1.38937	88	0.704892	-0.151877	95	neutral
HPRT1	Hypoxanthine-guanine phosphoribosyltransferase	34.7112	1.54047	217	30.5426	1.48491	180	0.879907	-0.0555634	298	neutral
EPS8L2	Epidermal growth factor receptor kinase substrate 8-like protein 2;Isoform 3 of Epidermal growth factor receptor kinase substrate 8-like protein 2	34.5583	1.53855	216	33.8733	1.52986	226	0.980178	-0.00869485	531	neutral
ANXA8L1	Annexin A8-like protein 1	34.4898	1.53769	215	38.1138	1.58108	284	1.10507	0.0433913	776	neutral
SERPINI1	Neuroserpin	34.4642	1.53737	214	25.3716	1.40435	106	0.736173	-0.13302	127	neutral
STK39	STE20/SPS1-related proline-alanine-rich protein kinase;Isoform 2 of STE20/SPS1-related proline-alanine-rich protein kinase	34.4383	1.53704	213	32.3721	1.51017	204	0.940004	-0.0268702	433	neutral
TRIM16	Tripartite motif-containing protein 16	34.3767	1.53626	212	30.0252	1.47749	169	0.873418	-0.058778	283	neutral
GRHPR	Glyoxylate reductase/hydroxypyruvate reductase	34.3415	1.53582	211	38.5639	1.58618	288	1.12295	0.0503617	793	neutral
;TGM3	TGc domain-containing protein;Protein-glutamine gamma-glutamyltransferase E	34.2828	1.53508	210	52.0793	1.71667	400	1.51911	0.181589	851	neutral
SOD1	Superoxide dismutase [Cu-Zn]	34.2744	1.53497	209	30.367	1.4824	177	0.885998	-0.0525674	310	neutral
ARG1	Arginase-1;Isoform 2 of Arginase-1	33.9951	1.53142	208	68.6737	1.83679	506	2.0201	0.305373	860	neutral
ITIH1	Inter-alpha-trypsin inhibitor heavy chain H1	33.9471	1.5308	207	34.4312	1.53695	234	1.01426	0.00614952	621	neutral
TUBA1C	Tubulin alpha chain;Tubulin alpha-1C chain	33.8505	1.52956	206	32.9655	1.51806	210	0.973858	-0.0115045	511	neutral
BAG1	BAG family molecular chaperone regulator 1;BAG family molecular chaperone regulator 1;Isoform 2 of BAG family molecular chaperone regulator 1;Isoform 3 of BAG family molecular chaperone regulator 1;Isoform 4 of BAG family molecular chaperone regulator 1	33.8503	1.52956	205	38.1124	1.58107	283	1.12591	0.0515044	795	neutral
CASP7	Caspase-7;Isoform Alpha' of Caspase-7	33.8063	1.529	204	32.6205	1.51349	208	0.964925	-0.0155063	487	neutral
HEXA	Beta-hexosaminidase;Beta-hexosaminidase;Beta-hexosaminidase subunit alpha	33.7004	1.52763	203	29.914	1.47587	164	0.887647	-0.0517598	313	neutral
CAST	Calpastatin;Calpastatin;Calpastatin (Fragment);Calpastatin;Calpastatin;Calpastatin;Isoform 10 of Calpastatin;Isoform 2 of Calpastatin;Isoform 3 of Calpastatin;Isoform 4 of Calpastatin;Isoform 5 of Calpastatin;Isoform 6 of Calpastatin;Isoform 7 of Calpastatin;Isoform 8 of Calpastatin;Isoform 9 of Calpastatin	33.6283	1.5267	202	34.9945	1.544	242	1.04063	0.0172956	685	neutral
AHCYL2	Adenosylhomocysteinase 3;Isoform 2 of Adenosylhomocysteinase 3	33.5611	1.52584	201	35.4274	1.54934	248	1.05561	0.0235028	719	neutral
HARS	Histidine--tRNA ligase, cytoplasmic;Isoform 4 of Histidine--tRNA ligase, cytoplasmic	33.3737	1.5234	200	33.5297	1.52543	221	1.00467	0.00202515	601	neutral
COPA	Coatomer subunit alpha;Isoform 2 of Coatomer subunit alpha	33.3606	1.52323	199	32.0569	1.50592	198	0.960921	-0.0173123	477	neutral
PTGDS	Prostaglandin-H2 D-isomerase	33.3528	1.52313	198	29.7451	1.47342	162	0.891833	-0.0497166	324	neutral
PDLIM5	PDZ and LIM domain protein 5	33.2956	1.52239	197	27.8621	1.44501	137	0.83681	-0.0773732	235	neutral
ANPEP	Aminopeptidase N	33.238	1.52163	196	27.5664	1.44038	133	0.829365	-0.0812542	228	neutral
RPLP0	60S acidic ribosomal protein P0;60S acidic ribosomal protein P0;Isoform 2 of 60S acidic ribosomal protein P0	33.2317	1.52155	195	29.5084	1.46994	154	0.887958	-0.0516077	316	neutral
PMM2	Phosphomannomutase 2	33.1792	1.52087	194	33.8269	1.52926	225	1.01952	0.00839651	635	neutral
MX1	Interferon-induced GTP-binding protein Mx1	33.1616	1.52064	193	30.0564	1.47794	171	0.906362	-0.0426982	359	neutral
NAPA	Alpha-soluble NSF attachment protein	33.0565	1.51926	192	30.4678	1.48384	179	0.921687	-0.0354163	392	neutral
RAB25	Ras-related protein Rab-25	32.9856	1.51832	191	30.6119	1.48589	181	0.928038	-0.0324341	409	neutral
DNPEP	Aspartyl aminopeptidase	32.9175	1.51743	190	33.6243	1.52665	222	1.02147	0.00922623	647	neutral
PSMD14	26S proteasome non-ATPase regulatory subunit 14	32.7261	1.51489	189	29.7392	1.47333	161	0.90873	-0.041565	363	neutral
NIT2	Omega-amidase NIT2	32.6706	1.51416	188	33.4187	1.52399	219	1.0229	0.0098322	652	neutral
RPL7	60S ribosomal protein L7	32.6415	1.51377	187	34.483	1.53761	235	1.05642	0.023836	721	neutral
FAM49B	Protein FAM49B	32.6095	1.51334	186	32.2587	1.50865	201	0.989244	-0.00469659	554	neutral
MELTF	Melanotransferrin	32.3715	1.51016	185	24.5412	1.3899	89	0.758111	-0.120267	148	neutral
DAG1	Dystroglycan	32.3436	1.50979	184	32.2145	1.50805	200	0.996006	-0.00173809	572	neutral
ACO1	Cytoplasmic aconitate hydratase	32.281	1.50895	183	31.8288	1.50282	196	0.985991	-0.00612699	543	neutral
VPS35	Vacuolar protein sorting-associated protein 35	32.2586	1.50865	182	34.2065	1.53411	231	1.06038	0.025463	727	neutral
KPNB1	Importin subunit beta-1	32.1806	1.50759	181	34.8212	1.54184	237	1.08205	0.0342487	748	neutral
MAPK3	Mitogen-activated protein kinase 3	32.1214	1.50679	180	35.4202	1.54925	247	1.1027	0.0424569	773	neutral
SH3BGRL	SH3 domain-binding glutamic acid-rich-like protein	31.9086	1.50391	179	37.7867	1.57734	281	1.18422	0.0734311	820	neutral
JUP	Junction plakoglobin	31.7031	1.5011	178	52.0925	1.71678	401	1.64314	0.215674	853	neutral
DNPH1	2'-deoxynucleoside 5'-phosphate N-hydrolase 1 (Fragment);2'-deoxynucleoside 5'-phosphate N-hydrolase 1	31.5904	1.49956	177	29.9326	1.47614	166	0.947521	-0.0234114	451	neutral
TAX1BP3	Tax1-binding protein 3	31.5351	1.49879	176	36.3908	1.56099	265	1.15398	0.0621972	805	neutral
VPS4B	Vacuolar protein sorting-associated protein 4B	31.5335	1.49877	175	34.948	1.54342	238	1.10828	0.0446507	779	neutral
ERAP1	Endoplasmic reticulum aminopeptidase 1;Isoform 2 of Endoplasmic reticulum aminopeptidase 1	31.2834	1.49531	174	23.1704	1.36493	62	0.740662	-0.13038	133	neutral
TES	Testin;Isoform 2 of Testin	31.2787	1.49525	173	34.9835	1.54386	240	1.11844	0.0486146	788	neutral
RPL14	60S ribosomal protein L14	31.1822	1.49391	172	31.2328	1.49461	187	1.00162	0.000703973	589	neutral
PSMB6	Proteasome subunit beta type-6	31.1449	1.49339	171	47.4643	1.67637	373	1.52398	0.18298	852	neutral
KRT8	Keratin, type II cytoskeletal 8;Isoform 2 of Keratin, type II cytoskeletal 8	31.1289	1.49316	170	25.4866	1.40631	110	0.818743	-0.0868522	212	neutral
MUC1	Mucin-1 (Fragment);Mucin-1;Mucin-1;Mucin-1;Mucin-1;Mucin-1;Mucin-1;Mucin-1;Isoform Y-LSP of Mucin-1;Isoform J13 of Mucin-1;Isoform 2 of Mucin-1;Isoform 3 of Mucin-1;Isoform 4 of Mucin-1;Isoform Y of Mucin-1;Isoform 8 of Mucin-1	31.0724	1.49238	169	29.0148	1.46262	149	0.933781	-0.0297551	417	neutral
BDH2	3-hydroxybutyrate dehydrogenase type 2	30.9841	1.49114	168	31.3755	1.49659	189	1.01263	0.00545137	617	neutral
PSMC2	26S proteasome regulatory subunit 7	30.9599	1.4908	167	30.4085	1.48299	178	0.982189	-0.00780508	535	neutral
BZW1	Basic leucine zipper and W2 domain-containing protein 1;Isoform 3 of Basic leucine zipper and W2 domain-containing protein 1;Isoform 4 of Basic leucine zipper and W2 domain-containing protein 1	30.9464	1.49061	166	33.3072	1.52254	218	1.07629	0.0319287	742	neutral
VPS25	Vacuolar protein-sorting-associated protein 25	30.8592	1.48939	165	32.5283	1.51226	206	1.05409	0.0228765	713	neutral
NT5C	5'(3')-deoxyribonucleotidase, cytosolic type	30.6466	1.48638	164	29.6751	1.47239	156	0.968301	-0.0139896	494	neutral
GMPR2	GMP reductase;GMP reductase;GMP reductase;GMP reductase;GMP reductase;GMP reductase 2;Isoform 2 of GMP reductase 2	30.6306	1.48616	163	33.9768	1.53118	227	1.10925	0.0450277	780	neutral
SH3GL1	Endophilin-A2	30.5486	1.48499	162	26.7697	1.42764	127	0.876298	-0.0573482	289	neutral
FLNB	Filamin-B;Isoform 2 of Filamin-B;Isoform 8 of Filamin-B;Isoform 9 of Filamin-B	30.5009	1.48431	161	24.444	1.38817	85	0.80142	-0.0961397	193	neutral
RAD23B	UV excision repair protein RAD23 homolog B	30.3465	1.48211	160	27.119	1.43327	131	0.893645	-0.048835	328	neutral
HSPA13	Heat shock 70 kDa protein 13	30.2732	1.48106	159	22.3366	1.34902	54	0.737833	-0.132042	130	neutral
VAT1	Synaptic vesicle membrane protein VAT-1 homolog	30.1602	1.47943	158	25.4668	1.40597	109	0.844385	-0.0734596	243	neutral
PRKCD	Protein kinase C delta type;Isoform 2 of Protein kinase C delta type	30.0833	1.47833	157	31.3943	1.49685	190	1.04358	0.0185247	693	neutral
PNP	Purine nucleoside phosphorylase	30.074	1.47819	156	24.0235	1.38064	78	0.798812	-0.0975555	192	neutral
NT5C2	Cytosolic purine 5'-nucleotidase	30.0409	1.47771	155	30.0441	1.47776	170	1.00011	4.57829e-05	583	neutral
CCT7	T-complex protein 1 subunit eta	29.9657	1.47662	154	32.6079	1.51332	207	1.08818	0.0366995	760	neutral
NIT1	Isoform 1 of Deaminated glutathione amidase	29.8532	1.47499	153	25.2142	1.40164	104	0.844605	-0.0733464	245	neutral
GLG1	Golgi apparatus protein 1;Isoform 2 of Golgi apparatus protein 1;Isoform 3 of Golgi apparatus protein 1	29.7658	1.47372	152	22.2387	1.34711	52	0.747124	-0.126607	137	neutral
ARPC5L	Actin-related protein 2/3 complex subunit 5-like protein	29.7145	1.47297	151	29.7214	1.47307	159	1.00023	0.00010057	584	neutral
ATP6V1E1	V-type proton ATPase subunit E 1	29.5677	1.47082	150	29.8784	1.47536	163	1.01051	0.00453948	609	neutral
PON1	Serum paraoxonase/arylesterase 1	29.4964	1.46977	149	28.8965	1.46085	148	0.979662	-0.00892387	528	neutral
CCT5	T-complex protein 1 subunit epsilon	29.4889	1.46966	148	30.113	1.47875	174	1.02117	0.00909629	646	neutral
CASP1	Caspase 1, apoptosis-related cysteine peptidase (Interleukin 1, beta, convertase), isoform CRA_c;Caspase-1;Isoform Beta of Caspase-1	29.4443	1.469	147	33.0397	1.51904	213	1.12211	0.0500348	791	neutral
SDCBP	Syntenin-1;Isoform 3 of Syntenin-1	29.4173	1.4686	146	19.7582	1.29575	23	0.671651	-0.172857	67	neutral
SDCBP	Isoform 2 of Syntenin-1	29.4173	1.4686	145	19.7582	1.29575	23	0.671651	-0.172857	67	neutral
DARS	Aspartate--tRNA ligase, cytoplasmic	29.385	1.46813	144	30.091	1.47844	173	1.02403	0.0103107	653	neutral
RPL18	60S ribosomal protein L18;60S ribosomal protein L18 (Fragment);60S ribosomal protein L18 (Fragment);60S ribosomal protein L18;Isoform 2 of 60S ribosomal protein L18	29.3716	1.46793	143	25.6453	1.40901	111	0.873133	-0.0589198	281	neutral
MCTS1	Malignant T-cell-amplified sequence 1;Isoform 3 of Malignant T-cell-amplified sequence 1	29.3034	1.46692	142	30.0776	1.47824	172	1.02642	0.0113255	657	neutral
SUMO3;SUMO3;SUMO3;SUMO3;SUMO2;SUMO2;SUMO4	Small ubiquitin-related modifier 3;SMT3 suppressor of mif two 3 homolog 3 (Yeast), isoform CRA_d;Small ubiquitin-related modifier 3;Isoform 2 of Small ubiquitin-related modifier 3;Small ubiquitin-related modifier 2;Isoform 2 of Small ubiquitin-related modifier 2;Small ubiquitin-related modifier 4	29.2966	1.46682	141	36.8277	1.56618	270	1.25706	0.0993572	841	neutral
CLIC6	Chloride intracellular channel protein 6;Isoform A of Chloride intracellular channel protein 6	29.296	1.46681	140	35.3024	1.5478	246	1.20502	0.0809958	826	neutral
CUL5	Cullin-5	29.2026	1.46542	139	31.5771	1.49937	192	1.08131	0.0339503	747	neutral
NUDT5	ADP-sugar pyrophosphatase	29.072	1.46348	138	27.9898	1.447	138	0.962775	-0.0164753	483	neutral
DNM2	Dynamin-2;Isoform 4 of Dynamin-2;Isoform 5 of Dynamin-2	28.9598	1.4618	137	25.9475	1.41409	116	0.895983	-0.0477002	335	neutral
CLEC3B	Tetranectin	28.8838	1.46065	136	29.7339	1.47325	160	1.02943	0.0125972	664	neutral
FKBP1A	Peptidyl-prolyl cis-trans isomerase FKBP1A	28.8708	1.46046	135	28.1393	1.44931	139	0.974662	-0.0111458	512	neutral
PPP1CA	Serine/threonine-protein phosphatase PP1-alpha catalytic subunit	28.8373	1.45995	134	32.1509	1.50719	199	1.11491	0.047239	785	neutral
LANCL1	Glutathione S-transferase LANCL1	28.8166	1.45964	133	32.9986	1.5185	211	1.14512	0.0588528	799	neutral
UAP1	UDP-N-acetylhexosamine pyrophosphorylase;Isoform 3 of UDP-N-acetylhexosamine pyrophosphorylase	28.8056	1.45948	132	28.3012	1.45181	142	0.982492	-0.00767098	536	neutral
CASP14	Caspase-14	28.7623	1.45882	131	60.6333	1.78271	462	2.10808	0.323887	863	neutral
SULT2B1	Sulfotransferase 2B1;Isoform 2 of Sulfotransferase 2B1	28.5202	1.45515	130	29.5781	1.47097	155	1.03709	0.0158184	677	neutral
CRYL1	Lambda-crystallin homolog;Isoform 2 of Lambda-crystallin homolog	28.4264	1.45372	129	25.6946	1.40984	113	0.903897	-0.0438809	355	neutral
RARS	Arginine--tRNA ligase, cytoplasmic	28.3309	1.45226	128	53.132	1.72536	413	1.87541	0.273096	856	neutral
SNX1	Sorting nexin-1	28.2851	1.45156	127	34.9934	1.54399	241	1.23717	0.0924287	835	neutral
RPL12	60S ribosomal protein L12	28.1804	1.44995	126	29.9452	1.47633	167	1.06262	0.0263789	729	neutral
VPS26A	Vacuolar protein sorting-associated protein 26A	28.1498	1.44948	125	28.5949	1.45629	145	1.01581	0.00681277	625	neutral
RPL30	60S ribosomal protein L30 (Fragment);60S ribosomal protein L30	28.1192	1.449	124	26.4465	1.42237	121	0.940513	-0.026635	434	neutral
NACA	Nascent polypeptide-associated complex subunit alpha, muscle-specific form;Isoform skNAC-2 of Nascent polypeptide-associated complex subunit alpha, muscle-specific form;Nascent polypeptide-associated complex subunit alpha;Nascent polypeptide-associated complex subunit alpha (Fragment);Nascent polypeptide-associated complex subunit alpha;Nascent polypeptide-associated complex subunit alpha	28.0524	1.44797	123	29.9208	1.47597	165	1.06661	0.0280041	732	neutral
CPNE3	Copine-3	28.0298	1.44762	122	24.8209	1.39482	96	0.885518	-0.0528024	308	neutral
PPP2R2A	Serine/threonine-protein phosphatase 2A 55 kDa regulatory subunit B alpha isoform	27.9332	1.44612	121	29.7071	1.47286	158	1.0635	0.0267393	730	neutral
RPS19	40S ribosomal protein S19	27.8371	1.44462	120	24.6042	1.39101	91	0.883866	-0.0536135	304	neutral
NIBAN1	Protein Niban 1	27.8166	1.4443	119	22.3006	1.34832	53	0.8017	-0.0959881	194	neutral
RPS3A	40S ribosomal protein S3a	27.8073	1.44416	118	28.8523	1.46018	147	1.03758	0.0160208	679	neutral
GALK1	Galactokinase;Isoform 2 of Galactokinase	27.7523	1.4433	117	30.3163	1.48168	176	1.09239	0.0383767	765	neutral
EHD3	EH domain-containing protein 3	27.7008	1.44249	116	24.7591	1.39373	94	0.893806	-0.0487568	329	neutral
CHMP4B	Charged multivesicular body protein 4b	27.6681	1.44198	115	29.0239	1.46276	150	1.049	0.0207769	701	neutral
EFEMP1	EGF-containing fibulin-like extracellular matrix protein 1;Isoform 2 of EGF-containing fibulin-like extracellular matrix protein 1;Isoform 3 of EGF-containing fibulin-like extracellular matrix protein 1;Isoform 4 of EGF-containing fibulin-like extracellular matrix protein 1	27.6302	1.44138	114	26.6484	1.42567	125	0.964464	-0.015714	486	neutral
STK26	Serine/threonine-protein kinase 26	27.6292	1.44137	113	23.7315	1.37532	69	0.858929	-0.0660428	265	neutral
VBP1	Prefoldin subunit 3;Isoform 2 of Prefoldin subunit 3	27.3151	1.4364	112	24.9217	1.39658	99	0.912378	-0.0398254	367	neutral
DDX1	ATP-dependent RNA helicase DDX1	27.2872	1.43596	111	25.1539	1.40061	102	0.92182	-0.0353541	393	neutral
RPS2	40S ribosomal protein S2	27.192	1.43444	110	28.5662	1.45585	144	1.05054	0.0214114	706	neutral
ACTR1A	Alpha-centractin	27.1664	1.43403	109	31.6089	1.49981	193	1.16353	0.0657779	809	neutral
AP1S1	AP complex subunit sigma;AP complex subunit sigma (Fragment);AP-1 complex subunit sigma-1A	26.9506	1.43057	108	24.8494	1.39532	98	0.922035	-0.0352526	394	neutral
KARS1	Lysine--tRNA ligase	26.8358	1.42871	107	26.4641	1.42266	122	0.986149	-0.00605766	544	neutral
PGM3	Phosphoacetylglucosamine mutase;Phosphoacetylglucosamine mutase;Phosphoacetylglucosamine mutase;Isoform 2 of Phosphoacetylglucosamine mutase	26.8109	1.42831	106	28.5992	1.45635	146	1.0667	0.0280417	733	neutral
CHMP3	Charged multivesicular body protein 3	26.723	1.42689	105	29.6931	1.47266	157	1.11115	0.0457708	782	neutral
PFN2	Profilin;Profilin;Isoform IIb of Profilin-2	26.7181	1.42681	104	31.7391	1.5016	194	1.18793	0.0747891	824	neutral
SERPINB12	Serpin B12;Isoform 2 of Serpin B12	26.7152	1.42676	103	50.8938	1.70666	396	1.90505	0.279906	857	neutral
STEAP4	Metalloreductase STEAP4	26.5685	1.42437	102	24.832	1.39501	97	0.934639	-0.029356	420	neutral
GSTZ1	Maleylacetoacetate isomerase	26.5177	1.42354	101	26.0146	1.41522	117	0.981026	-0.0083195	534	neutral
ATP6V1H	V-type proton ATPase subunit H;Isoform 2 of V-type proton ATPase subunit H	26.5165	1.42352	100	23.8848	1.37812	73	0.900751	-0.0453952	350	neutral
SWAP70	Switch-associated protein 70	26.4401	1.42226	99	22.8615	1.3591	58	0.864653	-0.0631582	269	neutral
PPP3CA	Serine/threonine-protein phosphatase 2B catalytic subunit alpha isoform;Isoform 2 of Serine/threonine-protein phosphatase 2B catalytic subunit alpha isoform	26.3723	1.42115	98	30.6413	1.48631	182	1.16188	0.0651604	808	neutral
ALDH1L1	Cytosolic 10-formyltetrahydrofolate dehydrogenase;Isoform 3 of Cytosolic 10-formyltetrahydrofolate dehydrogenase	26.086	1.41641	97	23.9165	1.3787	74	0.916834	-0.0377093	378	neutral
RPL13	60S ribosomal protein L13	25.9352	1.41389	96	23.9684	1.37964	76	0.924164	-0.0342512	399	neutral
DDX39B	Spliceosome RNA helicase DDX39B;Isoform 2 of Spliceosome RNA helicase DDX39B	25.9143	1.41354	95	28.1921	1.45013	141	1.0879	0.0365879	759	neutral
PA2G4	Proliferation-associated protein 2G4	25.7606	1.41096	94	27.8326	1.44455	136	1.08043	0.0335973	746	neutral
TARS1	Threonine--tRNA ligase 1, cytoplasmic;Isoform 2 of Threonine--tRNA ligase 1, cytoplasmic	25.7075	1.41006	93	25.6883	1.40974	112	0.999254	-0.000324064	580	neutral
KIF5B	Kinesin-1 heavy chain	25.6578	1.40922	92	24.4979	1.38913	87	0.954794	-0.0200901	467	neutral
PABPC1	Polyadenylate-binding protein;Polyadenylate-binding protein 1;Isoform 2 of Polyadenylate-binding protein 1	25.6135	1.40847	91	26.1295	1.41713	119	1.02014	0.00866183	642	neutral
HNRNPK	Heterogeneous nuclear ribonucleoprotein K;Isoform 2 of Heterogeneous nuclear ribonucleoprotein K;Isoform 3 of Heterogeneous nuclear ribonucleoprotein K	25.5302	1.40705	90	25.4431	1.40557	108	0.996589	-0.00148385	574	neutral
EIF5	Eukaryotic translation initiation factor 5	25.4733	1.40608	89	27.6929	1.44237	135	1.08714	0.0362843	756	neutral
CAB39L	Calcium-binding protein 39-like (Fragment);Calcium-binding protein 39-like	25.3603	1.40415	88	25.203	1.40145	103	0.993796	-0.00270271	564	neutral
ACAT2	Acetyl-CoA acetyltransferase, cytosolic	25.3381	1.40377	87	21.014	1.32251	39	0.829343	-0.0812656	227	neutral
CTBS	Di-N-acetylchitobiase	25.3132	1.40335	86	19.8621	1.29802	24	0.784654	-0.105322	176	neutral
ATP6V1G1	V-type proton ATPase subunit G 1	25.2739	1.40267	85	25.1339	1.40026	101	0.994462	-0.00241176	570	neutral
COPB2	Coatomer subunit beta';Isoform 2 of Coatomer subunit beta'	25.2081	1.40154	84	24.3565	1.38662	82	0.966219	-0.0149243	489	neutral
GMPPA	Mannose-1-phosphate guanyltransferase alpha;Isoform 2 of Mannose-1-phosphate guanyltransferase alpha	25.1289	1.40017	83	21.4393	1.33121	42	0.853171	-0.0689639	254	neutral
PSMC6	26S proteasome regulatory subunit 10B	25.12	1.40002	82	25.8155	1.41188	114	1.02769	0.0118613	660	neutral
AP2A2	AP-2 complex subunit alpha-2	25.032	1.3985	81	21.5242	1.33293	44	0.859866	-0.0655694	266	neutral
AP1M2	AP-1 complex subunit mu-2	24.9751	1.39751	80	26.7559	1.42742	126	1.0713	0.0299118	737	neutral
DDT	D-dopachrome decarboxylase	24.8501	1.39533	79	24.6905	1.39253	92	0.993578	-0.00279804	563	neutral
DERA	Deoxyribose-phosphate aldolase	24.7263	1.39316	78	25.2743	1.40268	105	1.02216	0.00951987	650	neutral
VTA1	Chromosome 6 open reading frame 55, isoform CRA_b;Vacuolar protein sorting-associated protein VTA1 homolog	24.6726	1.39221	77	26.8226	1.4285	129	1.08714	0.036287	757	neutral
PSMD12	26S proteasome non-ATPase regulatory subunit 12;Isoform 2 of 26S proteasome non-ATPase regulatory subunit 12	24.559	1.39021	76	23.299	1.36734	64	0.948695	-0.0228733	455	neutral
TKFC	Triokinase/FMN cyclase	24.5316	1.38973	75	23.3876	1.36899	65	0.953367	-0.0207398	464	neutral
PSMD5	26S proteasome non-ATPase regulatory subunit 5;Isoform 2 of 26S proteasome non-ATPase regulatory subunit 5	24.5284	1.38967	74	25.0326	1.39851	100	1.02055	0.0088363	644	neutral
ARHGAP1	Rho GTPase-activating protein 1	24.5242	1.38959	73	27.0361	1.43194	130	1.10243	0.0423495	772	neutral
TUBA4B	Putative tubulin-like protein alpha-4B	24.5201	1.38952	72	23.7755	1.37613	71	0.969632	-0.0133929	499	neutral
GSDMB	Gasdermin-B;Isoform 2 of Gasdermin-B;Isoform 3 of Gasdermin-B;Isoform 4 of Gasdermin-B;Isoform 6 of Gasdermin-B	24.5178	1.38948	71	23.7493	1.37565	70	0.968656	-0.0138306	496	neutral
IDE	Insulin-degrading enzyme	24.4324	1.38797	70	22.5143	1.35246	57	0.921493	-0.0355082	391	neutral
RPS6KA3	Ribosomal protein S6 kinase alpha-3	24.1676	1.38323	69	22.4093	1.35043	55	0.927246	-0.032805	406	neutral
SNX2	Sorting nexin-2	24.1377	1.3827	68	23.9423	1.37917	75	0.991905	-0.00352993	558	neutral
DBNL	Drebrin-like protein;Isoform 2 of Drebrin-like protein;Isoform 3 of Drebrin-like protein	24.0962	1.38195	67	25.4145	1.40508	107	1.05471	0.0231322	717	neutral
PBDC1	Protein PBDC1	24.0336	1.38082	66	21.8216	1.33889	47	0.907962	-0.0419325	360	neutral
LRRC47	Leucine-rich repeat-containing protein 47	24.0162	1.38051	65	24.0185	1.38055	77	1.00009	4.04945e-05	582	neutral
BAX	Apoptosis regulator BAX;Isoform Beta of Apoptosis regulator BAX;Isoform Epsilon of Apoptosis regulator BAX;Isoform Sigma of Apoptosis regulator BAX	23.958	1.37945	64	18.6139	1.26984	11	0.776939	-0.109613	165	neutral
PSMC1	26S proteasome regulatory subunit 4	23.859	1.37765	63	26.1293	1.41713	118	1.09515	0.0394756	766	neutral
hCG_2043426;DDX19B;DDX19A;DDX19A;DDX19B;DDX19B;DDX19B	HCG2043426, isoform CRA_b;ATP-dependent RNA helicase DDX19B;ATP-dependent RNA helicase DDX19A;ATP-dependent RNA helicase DDX19A;ATP-dependent RNA helicase DDX19B;Isoform 2 of ATP-dependent RNA helicase DDX19B;Isoform 4 of ATP-dependent RNA helicase DDX19B	23.7252	1.37521	62	24.0824	1.3817	79	1.01506	0.00648979	622	neutral
STARD10	START domain-containing protein 10 (Fragment);START domain-containing protein 10;START domain-containing protein 10	23.6893	1.37455	61	23.0923	1.36347	60	0.974802	-0.0110835	514	neutral
FKBP4	Peptidyl-prolyl cis-trans isomerase FKBP4	23.6057	1.37302	60	18.9436	1.27746	15	0.802501	-0.0955545	195	neutral
GALNT7	N-acetylgalactosaminyltransferase 7	23.5953	1.37282	59	32.6461	1.51383	209	1.38359	0.141006	846	neutral
GART	Trifunctional purine biosynthetic protein adenosine-3	23.3813	1.36887	58	23.8383	1.37728	72	1.01954	0.00840631	636	neutral
C12orf10	UPF0160 protein MYG1, mitochondrial	23.2944	1.36725	57	23.2614	1.36664	63	0.998583	-0.000615949	578	neutral
CYFIP1	Cytoplasmic FMR1-interacting protein 1	23.2654	1.36671	56	22.0165	1.34275	50	0.946319	-0.0239623	446	neutral
PSMD11	26S proteasome non-ATPase regulatory subunit 11;Isoform 2 of 26S proteasome non-ATPase regulatory subunit 11	23.2568	1.36655	55	20.0887	1.30295	30	0.863777	-0.0635983	268	neutral
FNTA	Protein farnesyltransferase/geranylgeranyltransferase type-1 subunit alpha	23.2507	1.36644	54	23.5156	1.37136	67	1.01139	0.00491932	611	neutral
COPG1	Coatomer subunit gamma-1	23.0312	1.36232	53	24.2277	1.38431	80	1.05195	0.0219956	712	neutral
MVP	Major vault protein	23.0207	1.36212	52	21.8705	1.33986	48	0.950035	-0.0222604	459	neutral
YARS	Tyrosine--tRNA ligase, cytoplasmic	23.006	1.36184	51	19.9736	1.30046	27	0.868187	-0.0613865	275	neutral
TJP2;;TJP2;TJP2;TJP2;TJP2;TJP2	Tight junction protein ZO-2;Uncharacterized protein;Tight junction protein ZO-2;Tight junction protein ZO-2 (Fragment);Tight junction protein ZO-2;Isoform C1 of Tight junction protein ZO-2;Isoform 7 of Tight junction protein ZO-2	22.982	1.36139	50	23.1609	1.36475	61	1.00778	0.00336735	607	neutral
AP1G1	AP-1 complex subunit gamma-1;Isoform 2 of AP-1 complex subunit gamma-1	22.9794	1.36134	49	24.7943	1.39435	95	1.07898	0.0330144	744	neutral
EIF3CL;EIF3C;EIF3C	Eukaryotic translation initiation factor 3 subunit C-like protein;Eukaryotic translation initiation factor 3 subunit C;Isoform 2 of Eukaryotic translation initiation factor 3 subunit C	22.8109	1.35814	48	21.3016	1.32841	41	0.933837	-0.029729	418	neutral
CA13	Carbonic anhydrase 13	22.7711	1.35738	47	24.7492	1.39356	93	1.08687	0.0361777	754	neutral
NAP1L4	Nucleosome assembly protein 1-like 4 (Fragment);Nucleosome assembly protein 1-like 4 (Fragment);Nucleosome assembly protein 1-like 4 (Fragment);Nucleosome assembly protein 1-like 4 (Fragment);Nucleosome assembly protein 1-like 4 (Fragment);Nucleosome assembly protein 1-like 4;Isoform 2 of Nucleosome assembly protein 1-like 4	22.7546	1.35707	46	24.3644	1.38676	83	1.07075	0.0296868	736	neutral
QARS	Glutamine--tRNA ligase;Isoform 2 of Glutamine--tRNA ligase	22.7356	1.35671	45	28.1428	1.44937	140	1.23783	0.0926602	836	neutral
GNAI2	Guanine nucleotide-binding protein G(i) subunit alpha-2;Isoform 2 of Guanine nucleotide-binding protein G(i) subunit alpha-2;Isoform 3 of Guanine nucleotide-binding protein G(i) subunit alpha-2;Isoform sGi2 of Guanine nucleotide-binding protein G(i) subunit alpha-2;Isoform 5 of Guanine nucleotide-binding protein G(i) subunit alpha-2;Isoform 6 of Guanine nucleotide-binding protein G(i) subunit alp…	22.6374	1.35483	44	18.4881	1.26689	10	0.816709	-0.0879327	209	neutral
DGKA	Diacylglycerol kinase alpha	22.5772	1.35367	43	24.461	1.38847	86	1.08344	0.0348038	749	neutral
ARCN1	Coatomer subunit delta	22.515	1.35247	42	21.885	1.34015	49	0.97202	-0.0123248	504	neutral
PSMB10	Proteasome subunit beta type-10	22.4793	1.35178	41	21.0384	1.32301	40	0.935904	-0.0287687	424	neutral
PAICS	Multifunctional protein ADE2 (Fragment);Multifunctional protein ADE2;Isoform 2 of Multifunctional protein ADE2	22.363	1.34953	40	20.0841	1.30285	29	0.898096	-0.0466773	340	neutral
PSMD2	26S proteasome non-ATPase regulatory subunit 2	22.3052	1.34841	39	20.5736	1.31331	33	0.922366	-0.0350966	396	neutral
UCHL3	Ubiquitin carboxyl-terminal hydrolase;Ubiquitin carboxyl-terminal hydrolase isozyme L3;Ubiquitin carboxyl-terminal hydrolase isozyme L3 (Fragment)	22.2782	1.34788	38	22.8756	1.35937	59	1.02682	0.0114931	658	neutral
GALNT6	Polypeptide N-acetylgalactosaminyltransferase 6	22.0233	1.34288	37	17.194	1.23538	4	0.780719	-0.107505	170	neutral
PPL	Periplakin	21.9549	1.34153	36	23.6888	1.37454	68	1.07898	0.0330129	743	neutral
EIF2S1	Eukaryotic translation initiation factor 2 subunit 1	21.8922	1.34029	35	19.1903	1.28308	16	0.876578	-0.0572096	290	neutral
C5	Complement C5	21.8293	1.33904	34	26.5165	1.42352	123	1.21472	0.0844758	829	neutral
ACSS2	Acetyl-coenzyme A synthetase, cytoplasmic;Isoform 2 of Acetyl-coenzyme A synthetase, cytoplasmic	21.8078	1.33861	33	21.5925	1.3343	45	0.99013	-0.00430797	555	neutral
EPS8L1	Epidermal growth factor receptor kinase substrate 8-like protein 1	21.7888	1.33823	32	20.59	1.31366	34	0.944982	-0.0245766	440	neutral
APOE	Apolipoprotein E	21.6333	1.33512	31	18.1056	1.25781	8	0.836933	-0.0773091	236	neutral
SEC31A	Protein transport protein Sec31A;Protein transport protein Sec31A;Isoform 10 of Protein transport protein Sec31A;Isoform 2 of Protein transport protein Sec31A;Isoform 3 of Protein transport protein Sec31A;Isoform 4 of Protein transport protein Sec31A;Isoform 6 of Protein transport protein Sec31A;Isoform 8 of Protein transport protein Sec31A;Isoform 9 of Protein transport protein Sec31A	21.526	1.33296	30	21.4963	1.33236	43	0.998621	-0.000599284	579	neutral
EIF4E	Eukaryotic translation initiation factor 4E;Eukaryotic translation initiation factor 4E;Isoform 2 of Eukaryotic translation initiation factor 4E;Isoform 3 of Eukaryotic translation initiation factor 4E	21.3479	1.32935	29	19.9815	1.30063	28	0.935995	-0.0287267	425	neutral
AHNAK	Neuroblast differentiation-associated protein AHNAK	21.1392	1.32509	28	23.4698	1.37051	66	1.11025	0.04542	781	neutral
DPYD	Dihydropyrimidine dehydrogenase [NADP(+)]	20.8966	1.32008	27	20.7163	1.31631	35	0.991372	-0.00376322	556	neutral
GPS1	COP9 signalosome complex subunit 1;COP9 signalosome complex subunit 1;Isoform 4 of COP9 signalosome complex subunit 1;Isoform 2 of COP9 signalosome complex subunit 1	20.8368	1.31883	26	17.7075	1.24816	6	0.849821	-0.0706728	247	neutral
DNAJB1	DnaJ homolog subfamily B member 1	20.8331	1.31875	25	20.8861	1.31986	38	1.00254	0.00110302	591	neutral
TXNRD1	Thioredoxin reductase 1, cytoplasmic;Thioredoxin reductase 1, cytoplasmic;Thioredoxin reductase 1, cytoplasmic;Thioredoxin reductase 1, cytoplasmic;Thioredoxin reductase 1, cytoplasmic;Thioredoxin reductase 1, cytoplasmic;Isoform 2 of Thioredoxin reductase 1, cytoplasmic;Isoform 3 of Thioredoxin reductase 1, cytoplasmic;Isoform 4 of Thioredoxin reductase 1, cytoplasmic;Isoform 5 of Thioredoxin re…	20.7663	1.31736	24	20.3482	1.30853	31	0.979865	-0.00883375	530	neutral
COPB1	Coatomer subunit beta	20.7577	1.31718	23	24.3948	1.3873	84	1.17522	0.0701192	816	neutral
UBA7	Ubiquitin-like modifier-activating enzyme 7	20.696	1.31589	22	19.2847	1.28521	17	0.931808	-0.0306737	413	neutral
PSMD3	26S proteasome non-ATPase regulatory subunit 3	20.5302	1.31239	21	18.8439	1.27517	14	0.917863	-0.037222	380	neutral
MYO6	Myosin VI transcript variant 007	20.4651	1.31101	20	20.8728	1.31958	37	1.01992	0.00856707	639	neutral
PPM1A	Protein phosphatase 1A;Isoform 3 of Protein phosphatase 1A	20.2538	1.30651	19	24.5982	1.3909	90	1.21449	0.0843952	828	neutral
CLINT1	Clathrin interactor 1;Isoform 3 of Clathrin interactor 1	20.195	1.30524	18	22.1246	1.34487	51	1.09554	0.03963	767	neutral
PTER	Phosphotriesterase-related protein;Isoform 2 of Phosphotriesterase-related protein	20.1539	1.30436	17	20.8361	1.31882	36	1.03385	0.0144581	668	neutral
RABGGTA	Geranylgeranyl transferase type-2 subunit alpha	19.7491	1.29555	16	16.8807	1.22739	2	0.854761	-0.0681552	257	neutral
TLN1	Talin-1	19.7058	1.29459	15	19.4509	1.28894	20	0.987063	-0.00565494	549	neutral
PSMD1	26S proteasome non-ATPase regulatory subunit 1	19.5588	1.29134	14	19.9313	1.29954	26	1.01904	0.00819278	633	neutral
FASN	Fatty acid synthase	19.442	1.28874	13	19.4052	1.28792	18	0.998105	-0.000823556	576	neutral
RTCB	RNA-splicing ligase RtcB homolog	19.4224	1.2883	12	19.8992	1.29884	25	1.02455	0.0105317	655	neutral
OSBP	Oxysterol-binding protein 1	19.3841	1.28745	11	17.7943	1.25028	7	0.917988	-0.0371629	382	neutral
AARS	Alanine--tRNA ligase, cytoplasmic	19.3288	1.2862	10	17.1433	1.2341	3	0.886934	-0.0521087	311	neutral
GSPT1	Isoform 2 of Eukaryotic peptide chain release factor GTP-binding subunit ERF3A;Isoform 3 of Eukaryotic peptide chain release factor GTP-binding subunit ERF3A	19.0361	1.27958	9	22.4812	1.35182	56	1.18098	0.0722427	818	neutral
SEPTIN9	Septin-9;Isoform 2 of Septin-9;Isoform 3 of Septin-9;Isoform 5 of Septin-9;Isoform 7 of Septin-9	18.955	1.27772	8	21.7108	1.33668	46	1.14539	0.0589526	800	neutral
PITPNA	Phosphatidylinositol transfer protein alpha isoform	18.566	1.26872	7	19.5066	1.29018	21	1.05066	0.0214625	708	neutral
EIF3B	Eukaryotic translation initiation factor 3 subunit B;Isoform 2 of Eukaryotic translation initiation factor 3 subunit B	18.3132	1.26277	6	18.3416	1.26344	9	1.00155	0.00067112	588	neutral
EIF3F	Eukaryotic translation initiation factor 3 subunit F	18.1308	1.25842	5	18.7484	1.27296	12	1.03406	0.014546	669	neutral
ACTR1B	Beta-centractin	17.8022	1.25047	4	15.3963	1.18742	1	0.864859	-0.0630548	270	neutral
SEPTIN2	Septin-2;Septin-2;Isoform 2 of Septin-2;Isoform 3 of Septin-2	17.7464	1.24911	3	18.7673	1.2734	13	1.05753	0.0242913	724	neutral
FH	Fumarate hydratase, mitochondrial;Isoform Cytoplasmic of Fumarate hydratase, mitochondrial	17.6498	1.24674	2	17.2197	1.23603	5	0.97563	-0.010715	520	neutral
KIF21A	Kinesin-like protein KIF21A;Isoform 2 of Kinesin-like protein KIF21A;Isoform 4 of Kinesin-like protein KIF21A;Isoform 5 of Kinesin-like protein KIF21A;Isoform 6 of Kinesin-like protein KIF21A	17.3641	1.23965	1	20.4226	1.31011	32	1.17614	0.0704589	817	neutral
